# Supplementary material for: Prevalence of chronic kidney disease stages 3–5 in low- and middle-income countries in Asia: A systematic review and meta-analysis
Source: PubMed Central journal article supplement (PMC8880400; doi:10.1371/journal.pone.0264393), 2022-02-25

**S6 Appendix. Other forest plots in chronic kidney disease prevalence and associated risk factors.**

Abbreviations:

CKD, chronic kidney disease; LMICs, low- and middle- income counties; LDLc, low-density lipoprotein cholesterol; HDLc, high-density lipoprotein cholesterol; HT, hypertension; HIV, human immunodeficiency viruses

**Fig S1. Meta-analysis of chronic kidney disease prevalence in LMICs in Asia stratified by quality of study.**

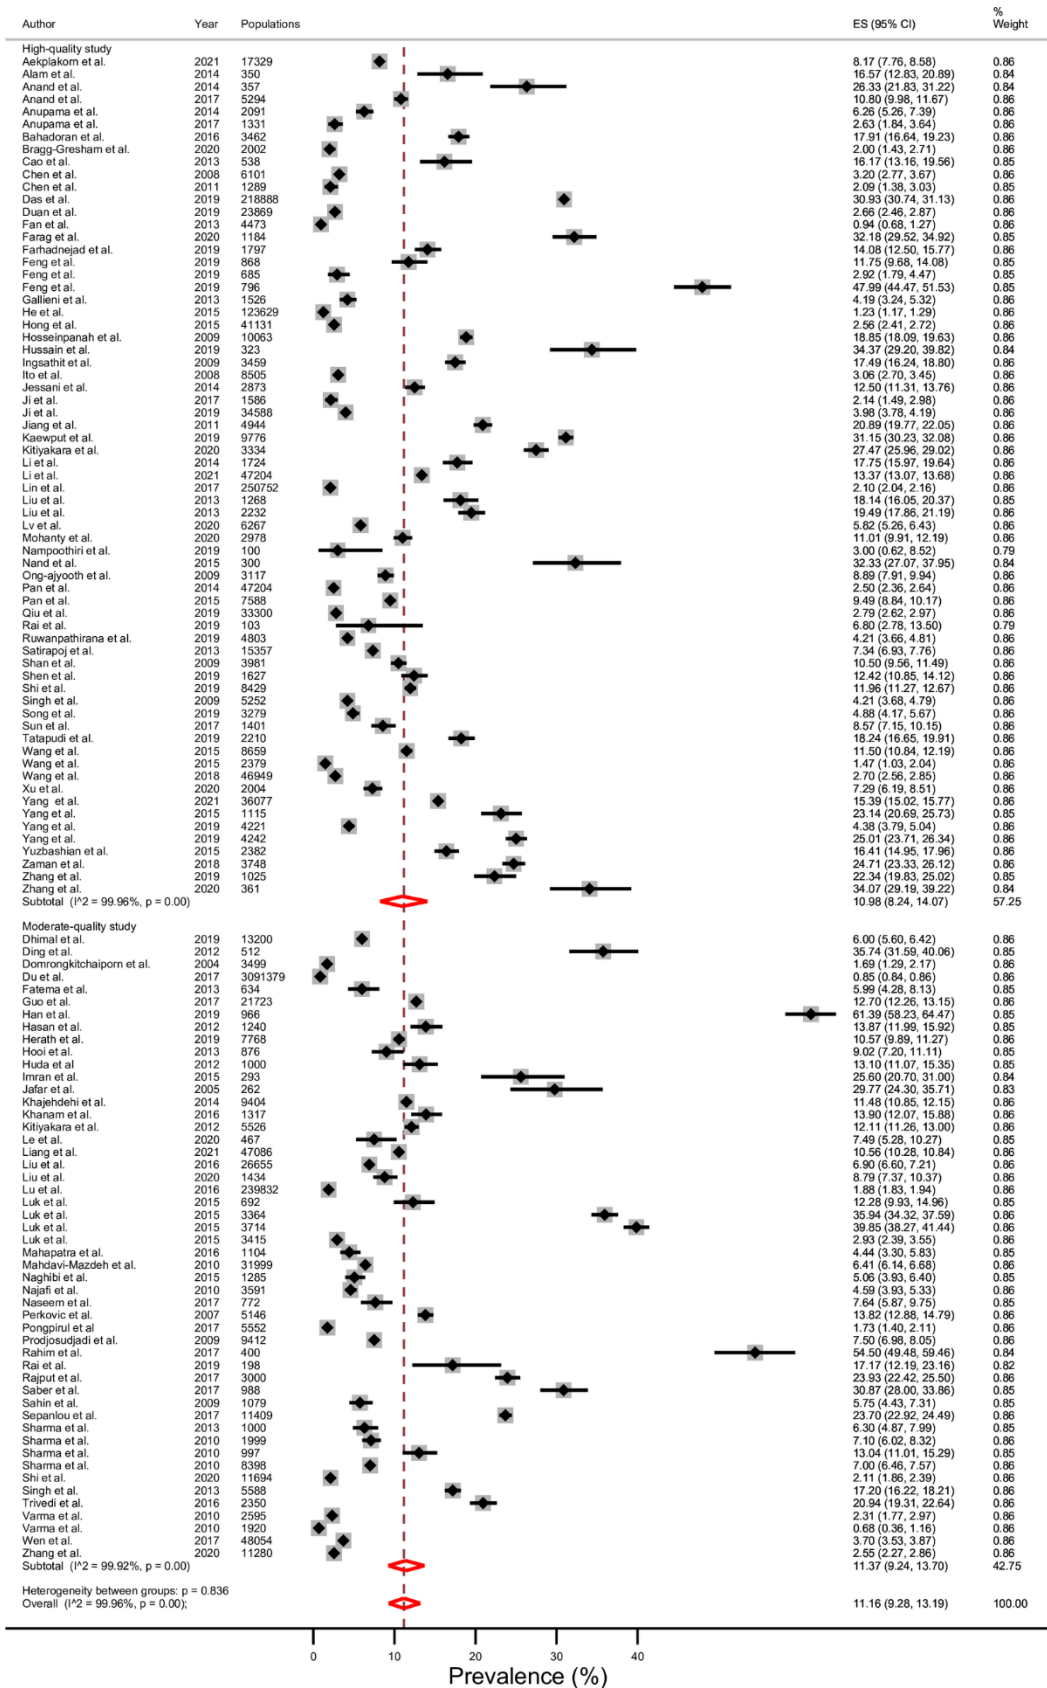

**Fig S2. Meta-analysis of chronic kidney disease prevalence in LMICs in Asia stratified by study design.**

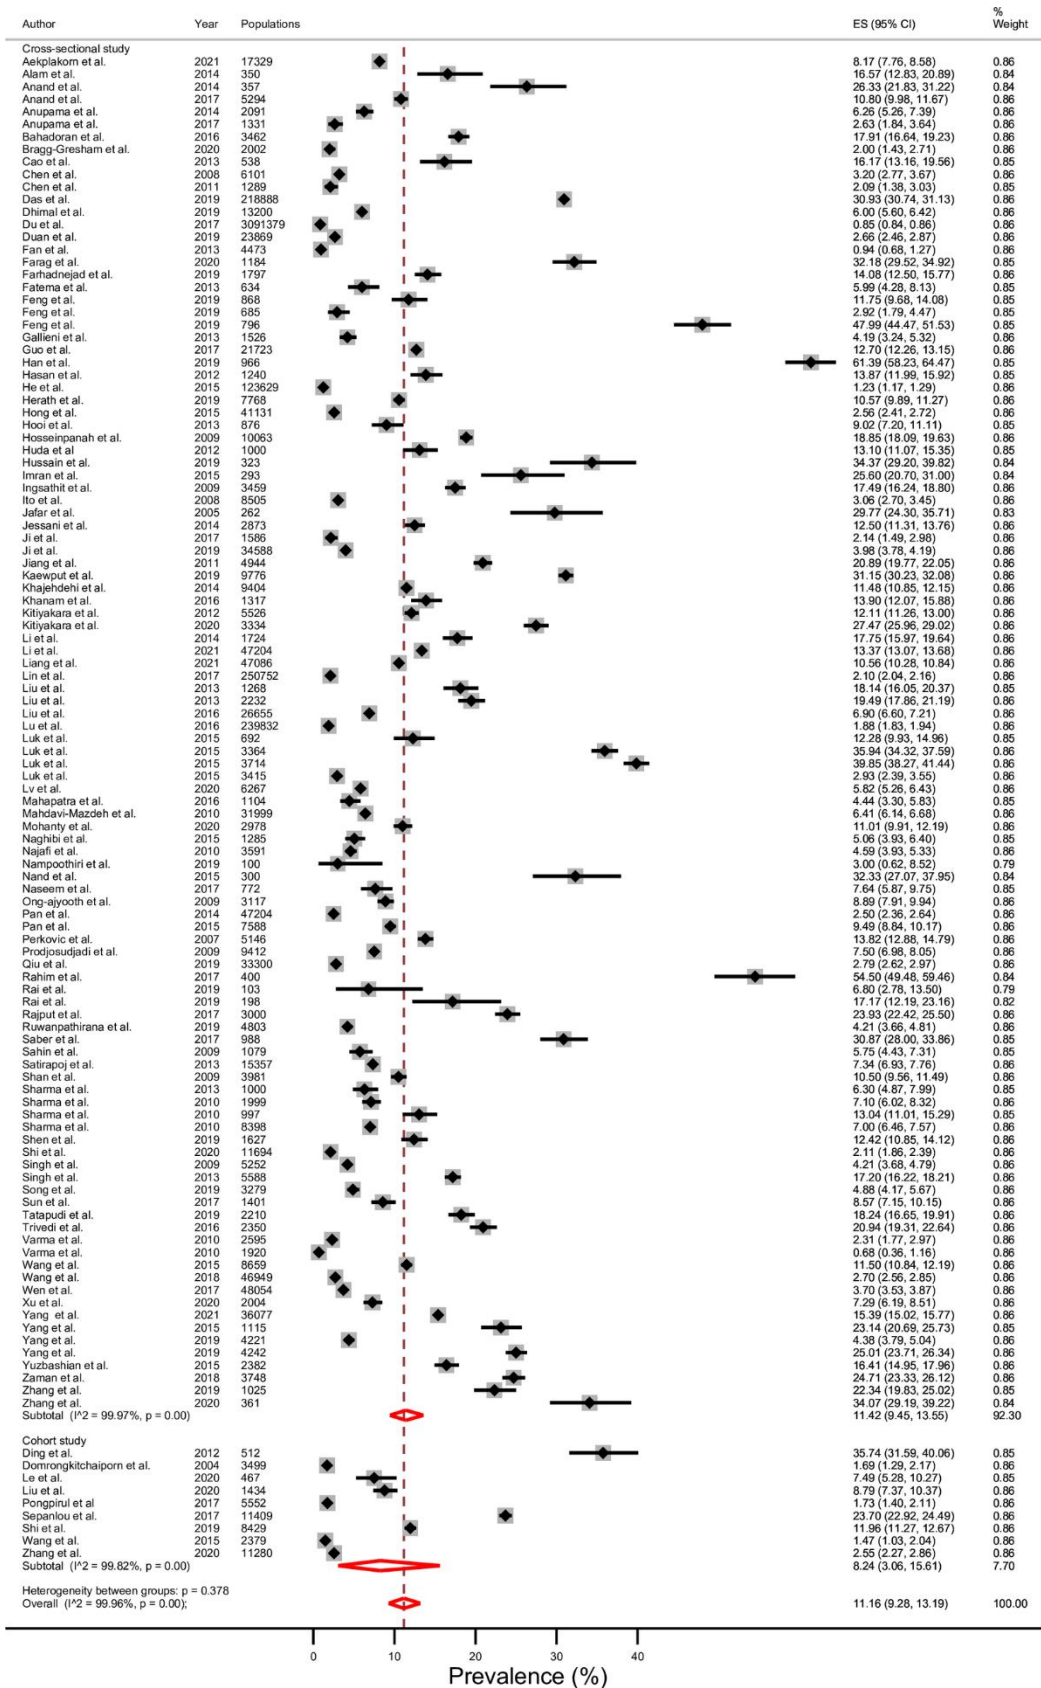

**Fig S3. Meta-analysis of chronic kidney disease prevalence in LMICs in Asia stratified by classification of CKD (methods for measurement of eGFR).**

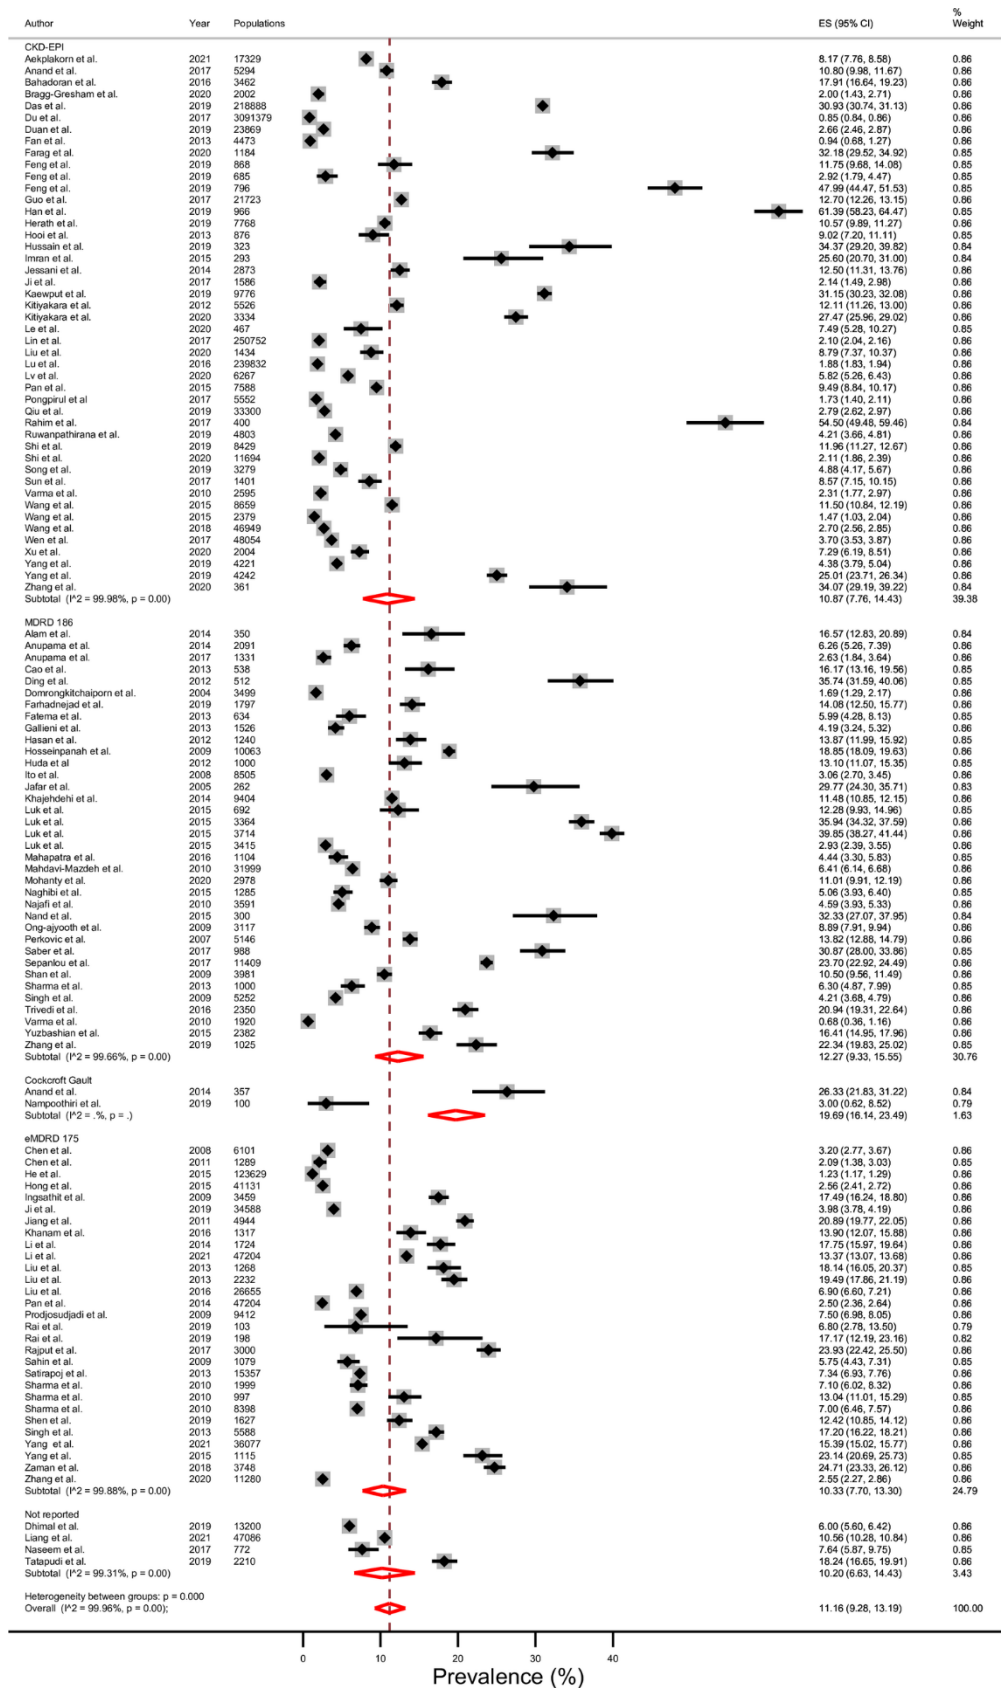

**Fig S4. Meta-analysis of chronic kidney disease prevalence in LMICs in Asia stratified by economic group.**

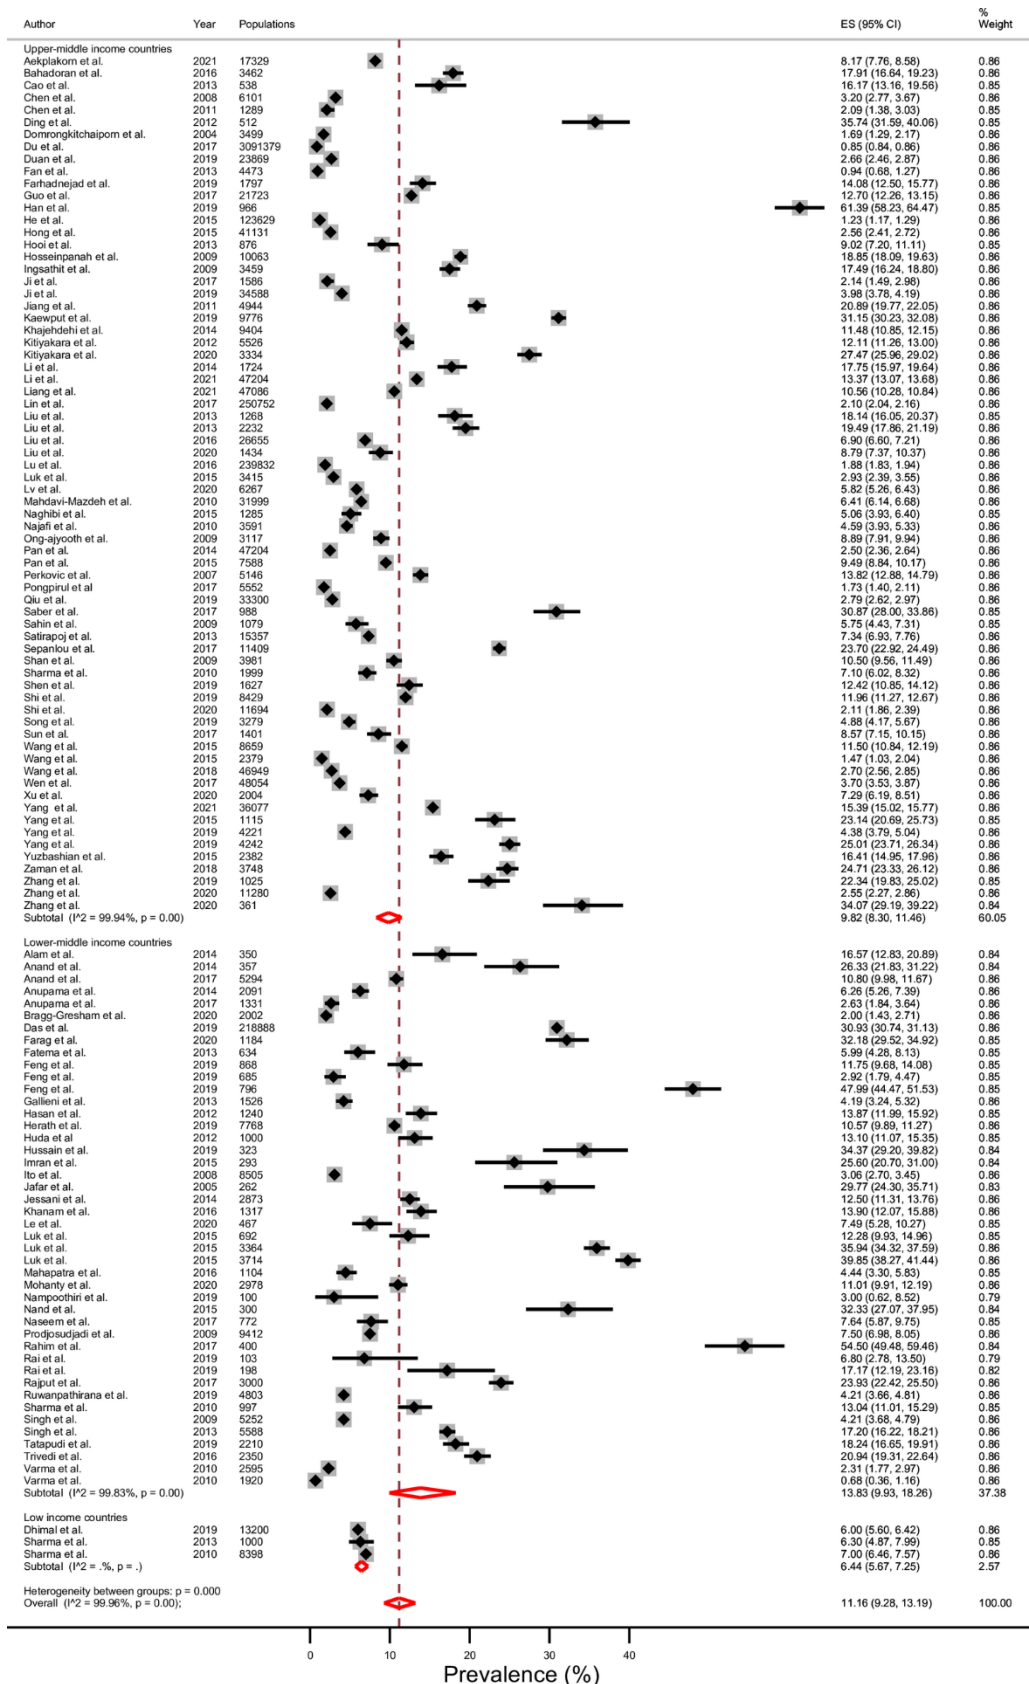

**Fig S5. Meta-analysis of association between chronic kidney disease and elderly age (age  $\geq 60$  years or  $<60$  years).**

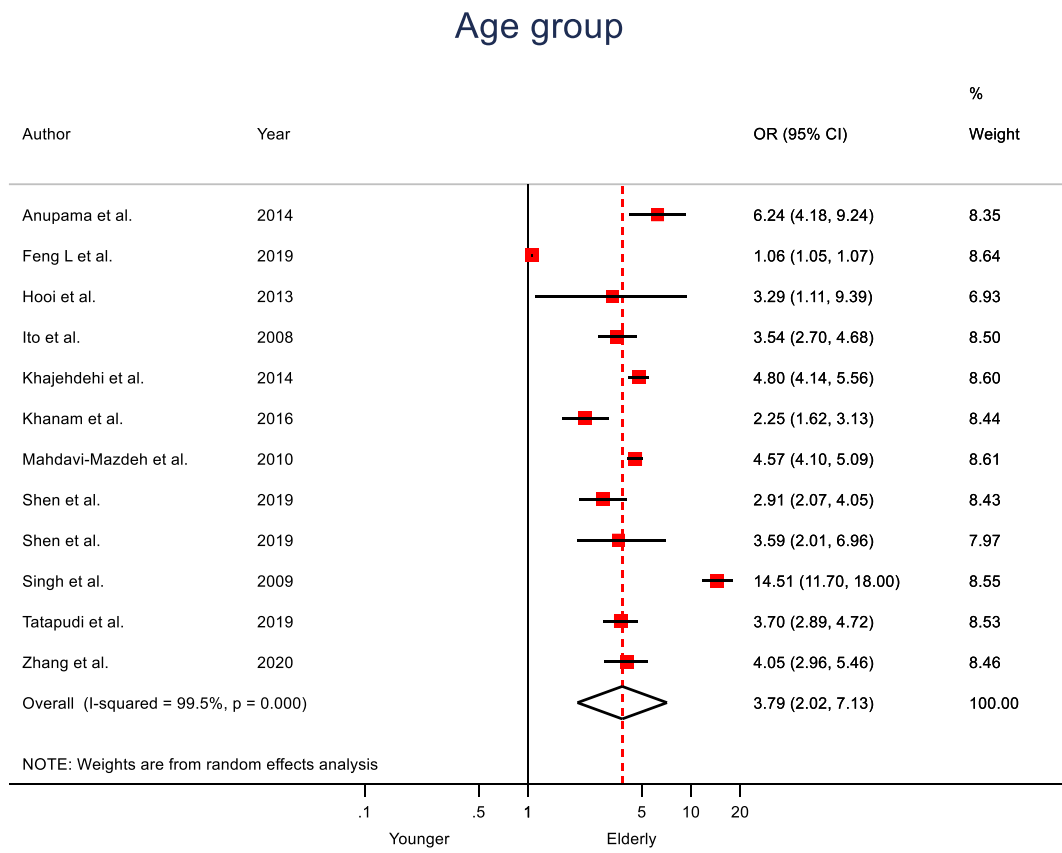



**Fig S6. Meta-analysis of association between chronic kidney disease and gender (male or female).**

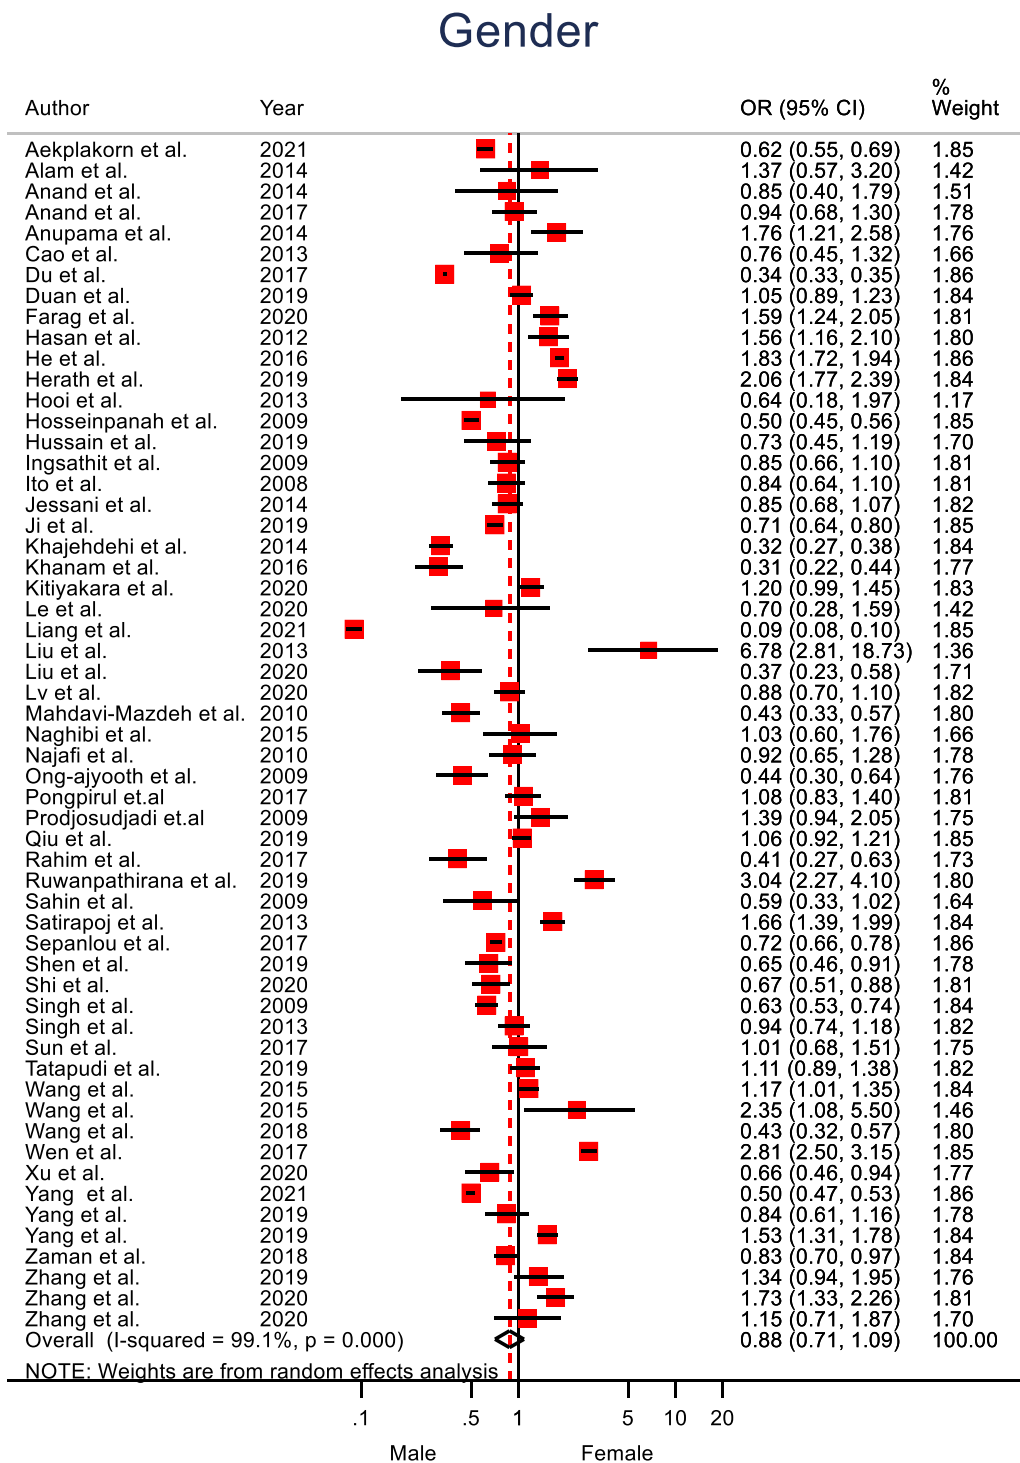

**Fig S7. Meta-analysis of association between chronic kidney disease and obese (BMI  $\geq 25$  or 18-25 kg/m<sup>2</sup>).**

## Obese

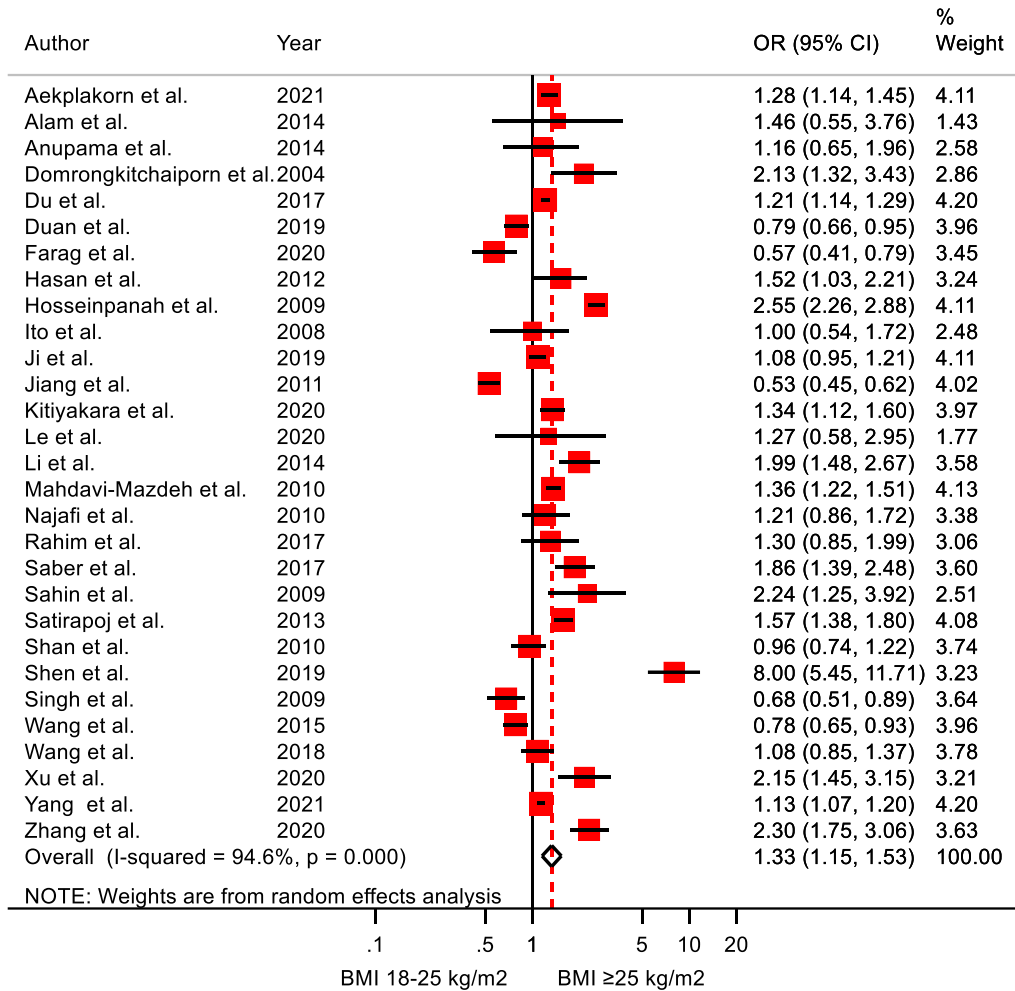



**Fig S8. Meta-analysis of association between chronic kidney disease and lower weight (BMI <18 or 18-25 kg/m<sup>2</sup>).**

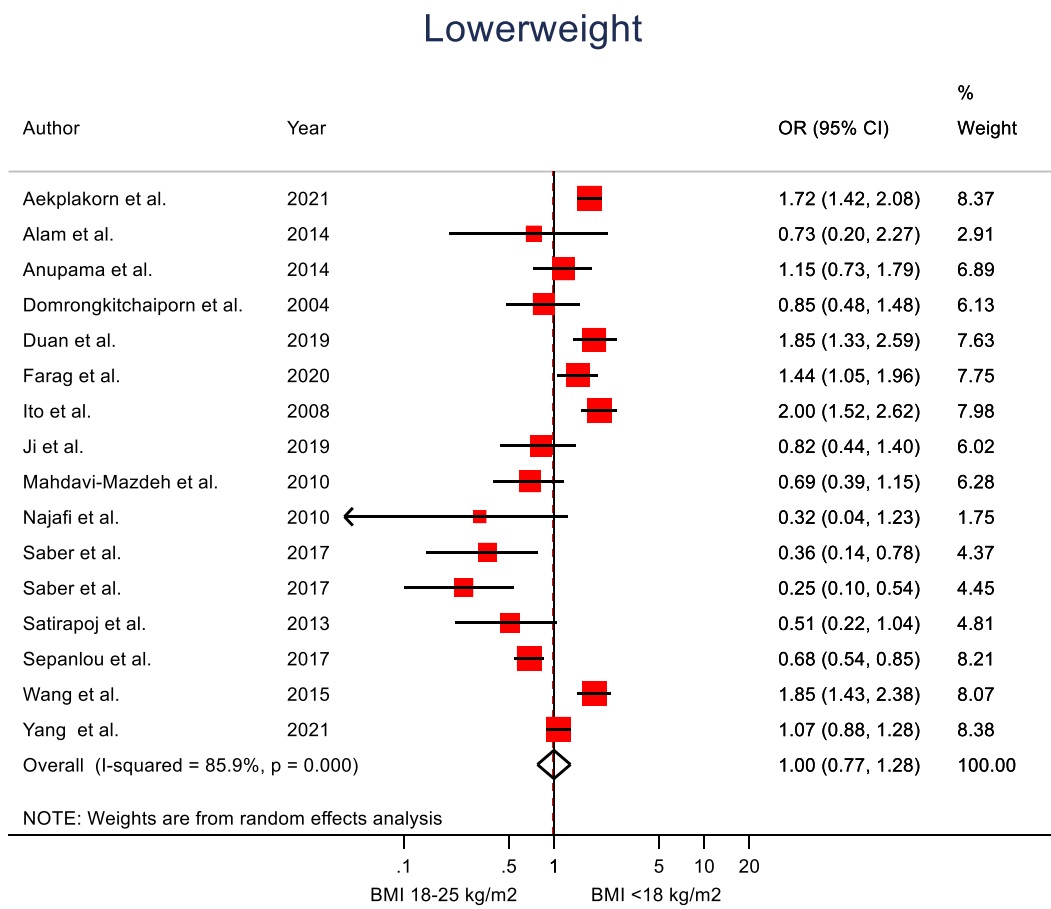

**Fig S9. Meta-analysis of association between chronic kidney disease and hypertension (yes or no).**

## Hypertension

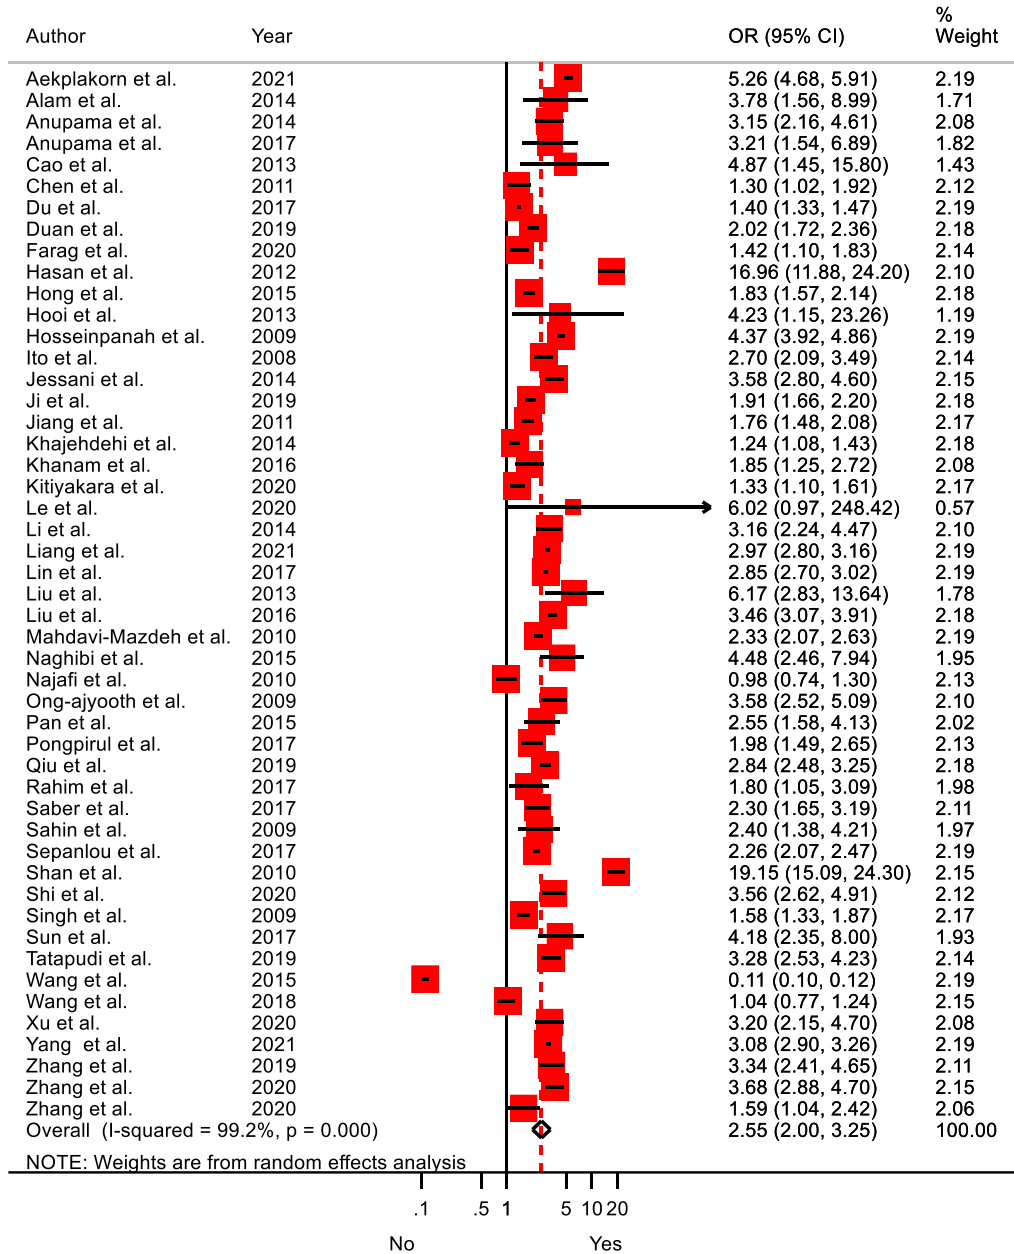



**Fig S11. Meta-analysis of association between chronic kidney disease and dyslipidaemia (yes or no).**

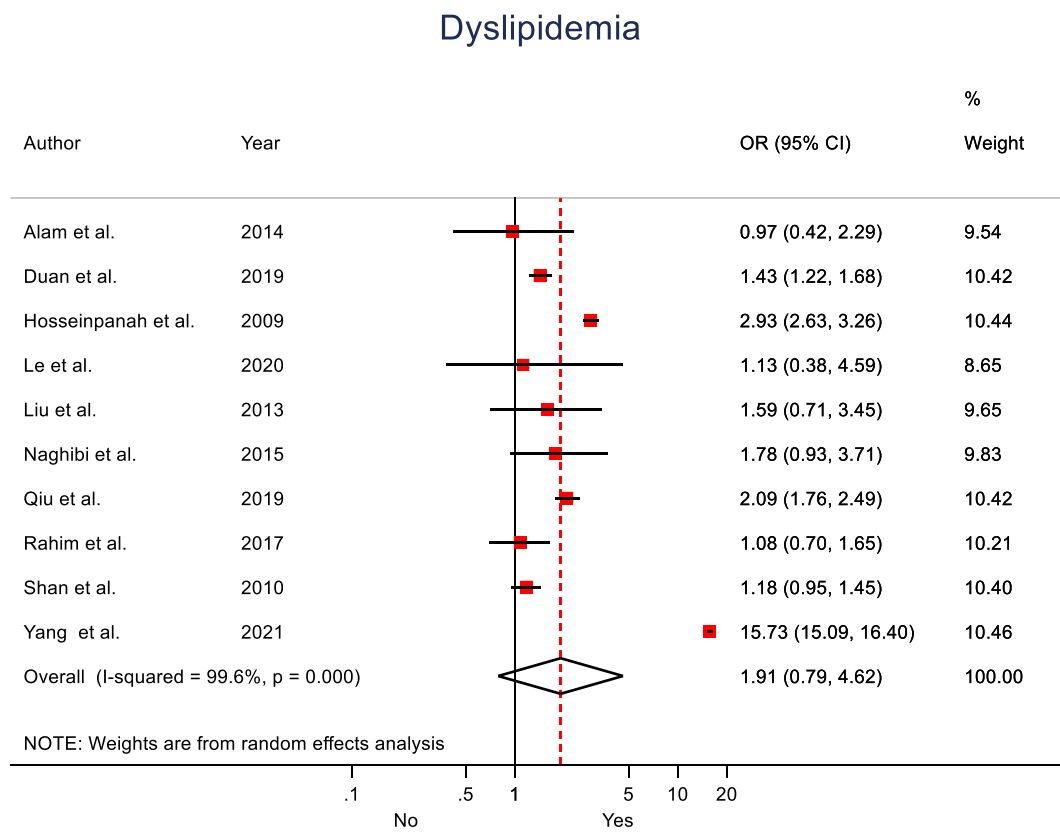

**Fig S12. Meta-analysis of association between chronic kidney disease and Hypertriglyceridemia (yes or no).**

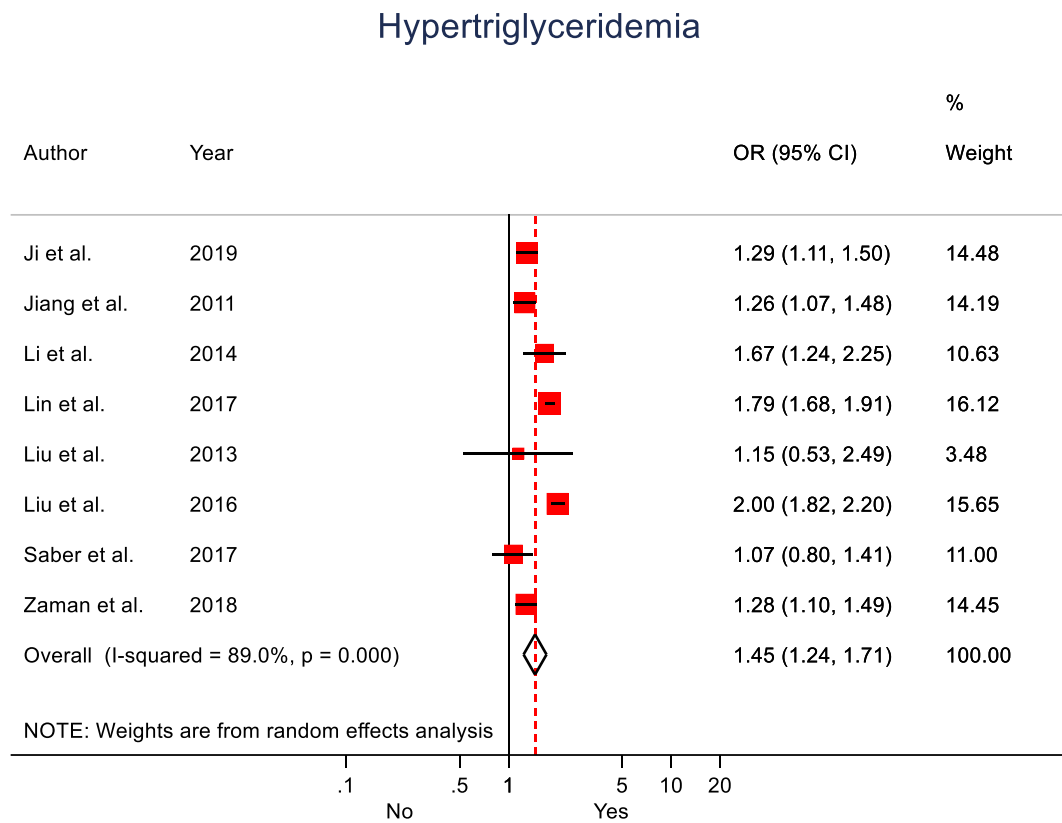

**Fig S13. Meta-analysis of association between chronic kidney disease and Hypercholesterolaemia (yes or no).**

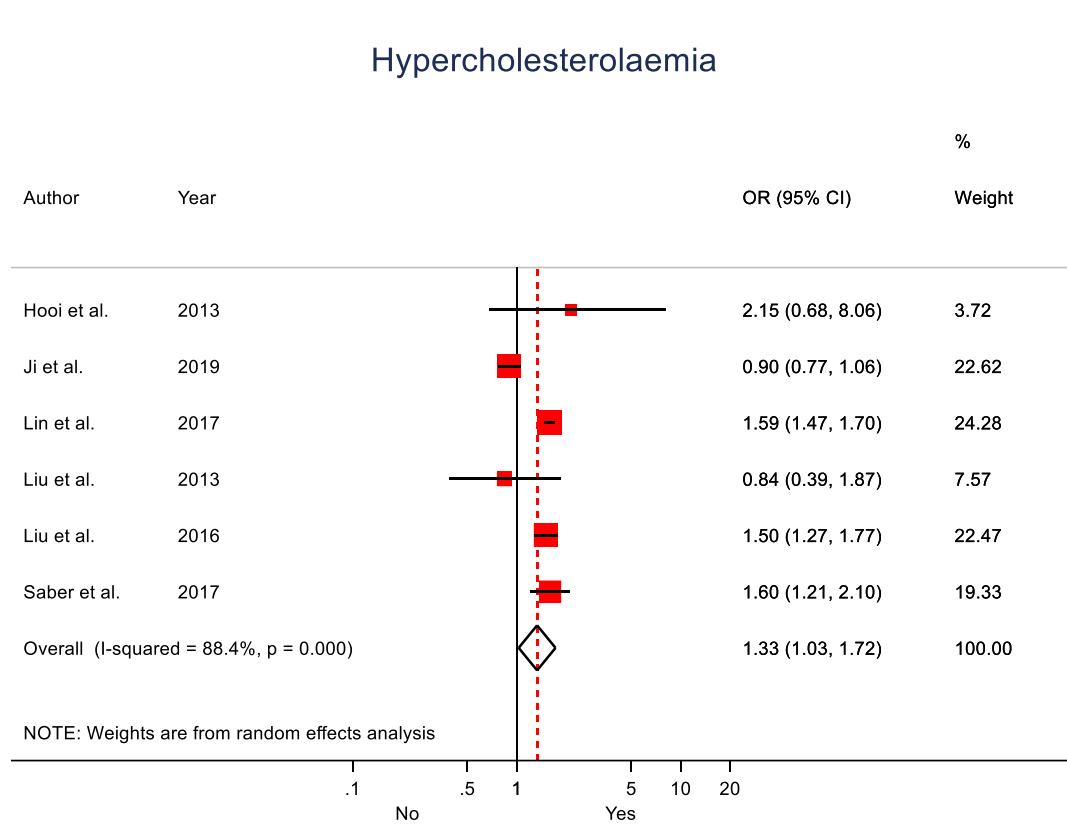

**Fig S14. Meta-analysis of association between chronic kidney disease and high level of low-density lipoprotein cholesterol (yes or no).**

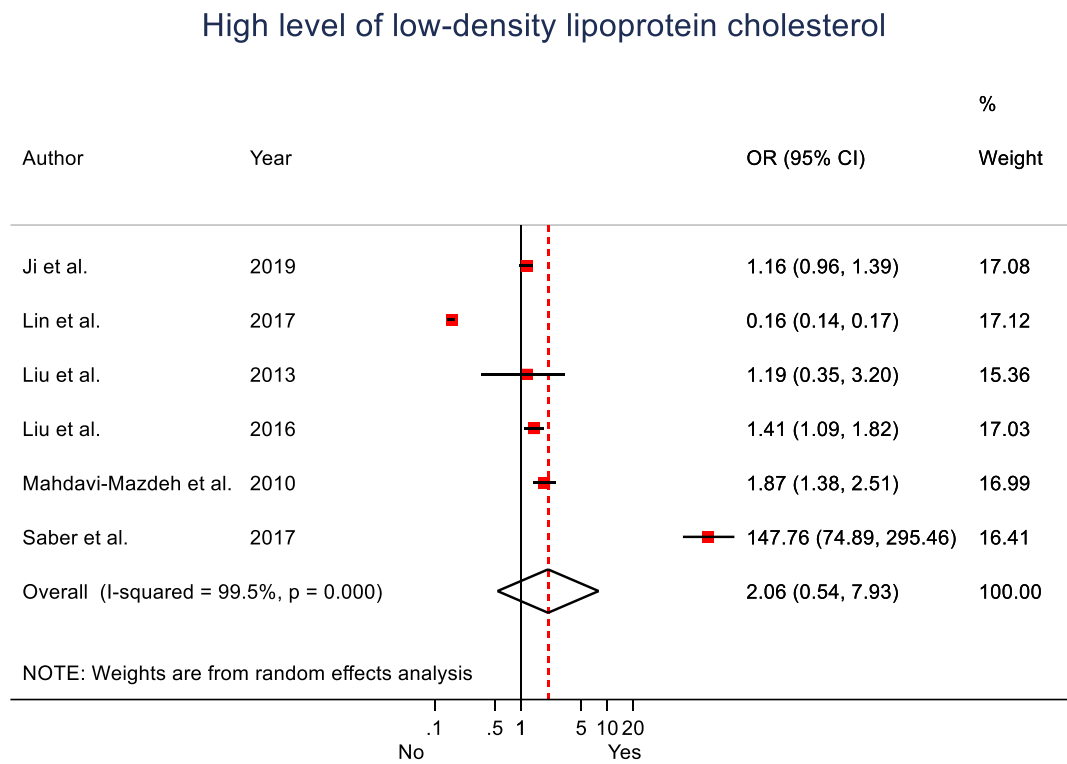



**Fig S15. Meta-analysis of association between chronic kidney disease and low level of high-density lipoprotein cholesterol (yes or no).**

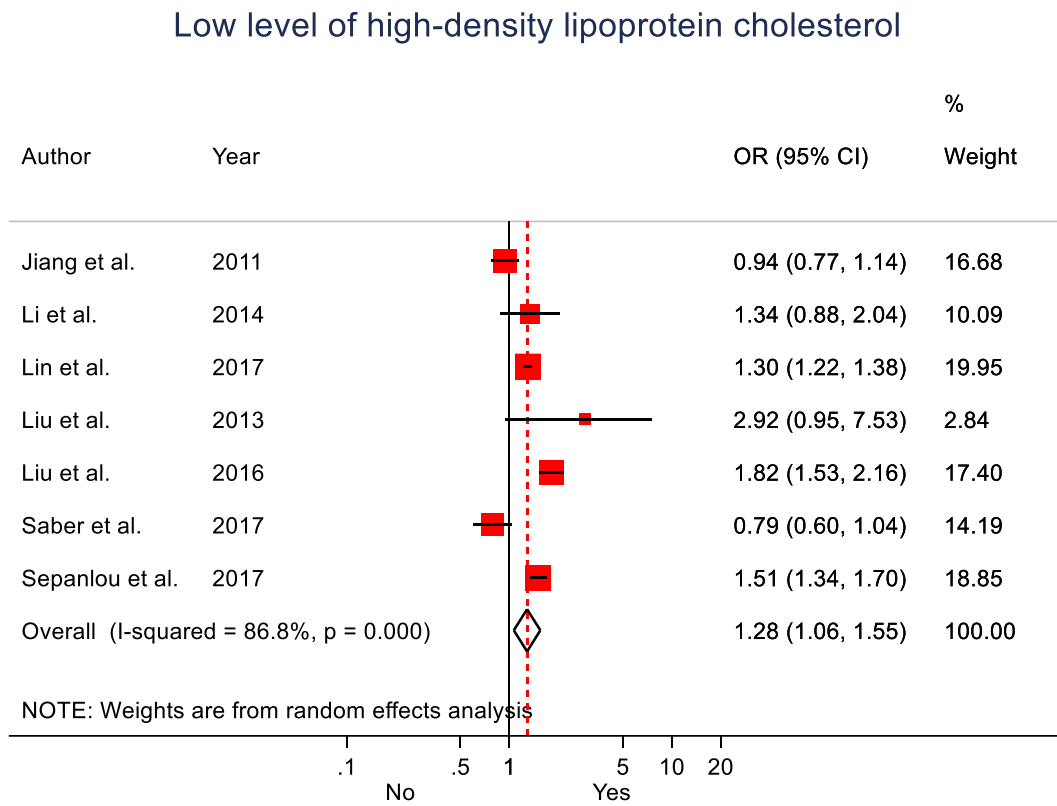

**Fig S16. Meta-analysis of association between chronic kidney disease and history of coronary heart disease (yes or no).**

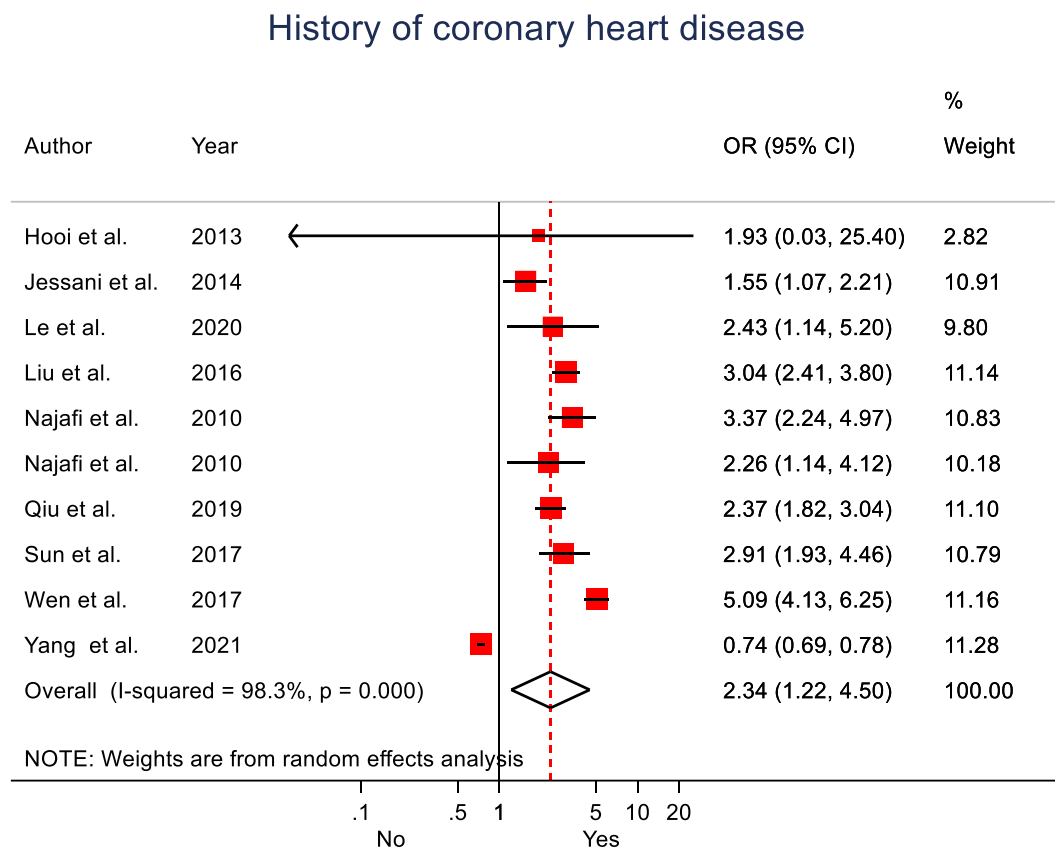

**Fig S17. Meta-analysis of association between chronic kidney disease and history of stroke (yes or no).**

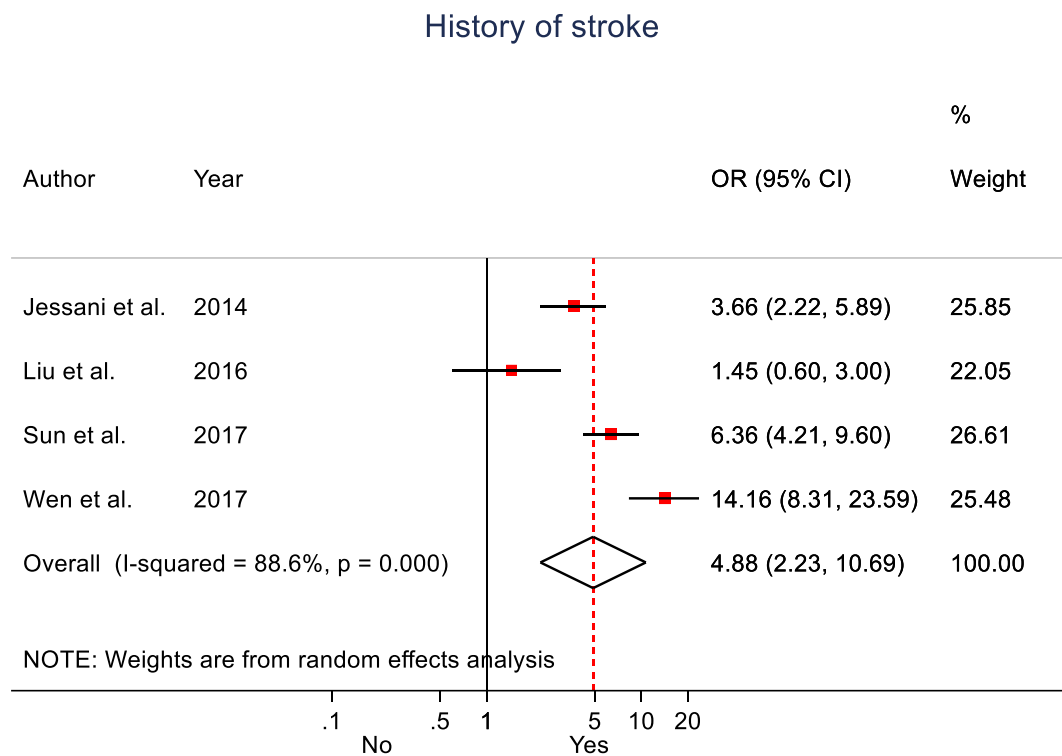

**Fig S18. Meta-analysis of association between chronic kidney disease and history of cardiovascular disease (yes or no).**

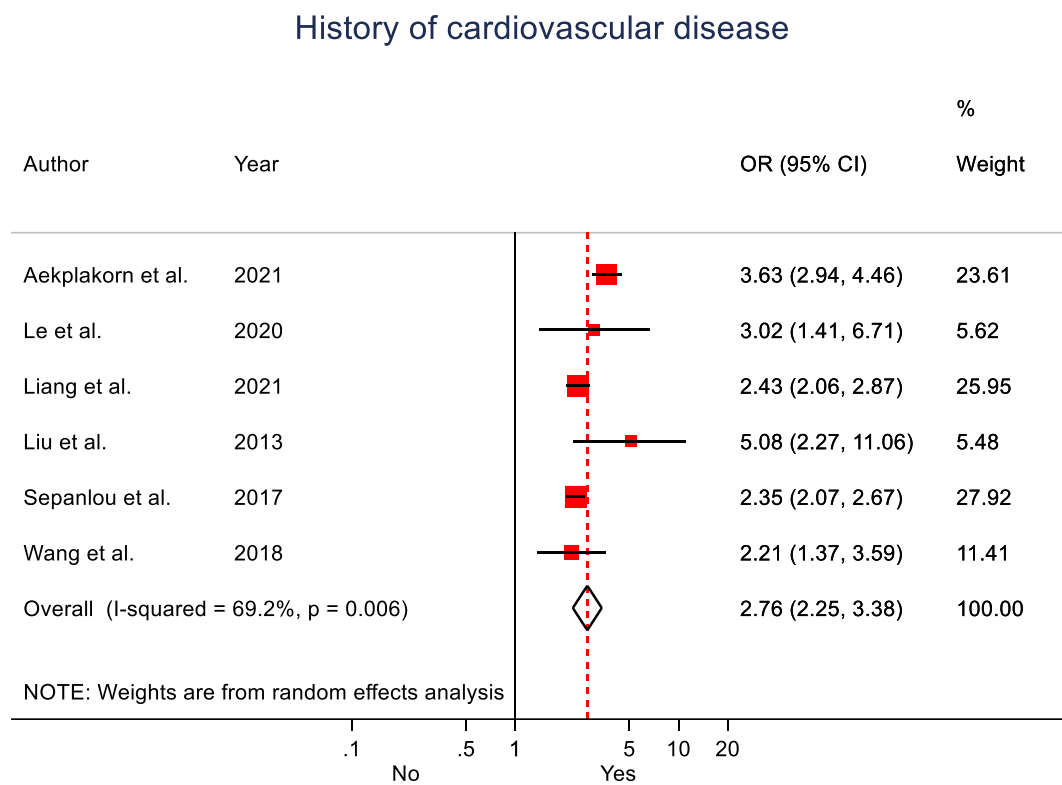

**Fig S19. Meta-analysis of association between chronic kidney disease and education (< high school or ≥ high school).**

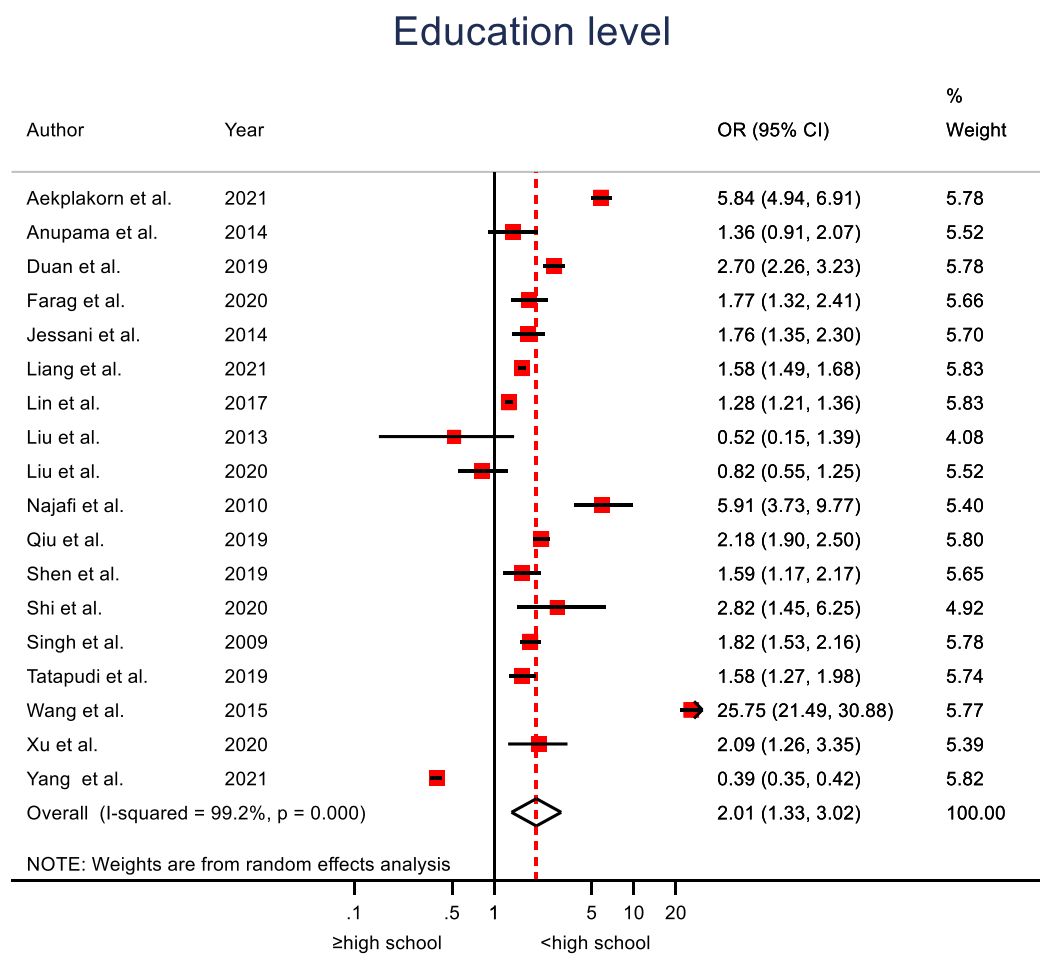

**Fig S20. Meta-analysis of association between chronic kidney disease and marital status (being unmarried or married).**

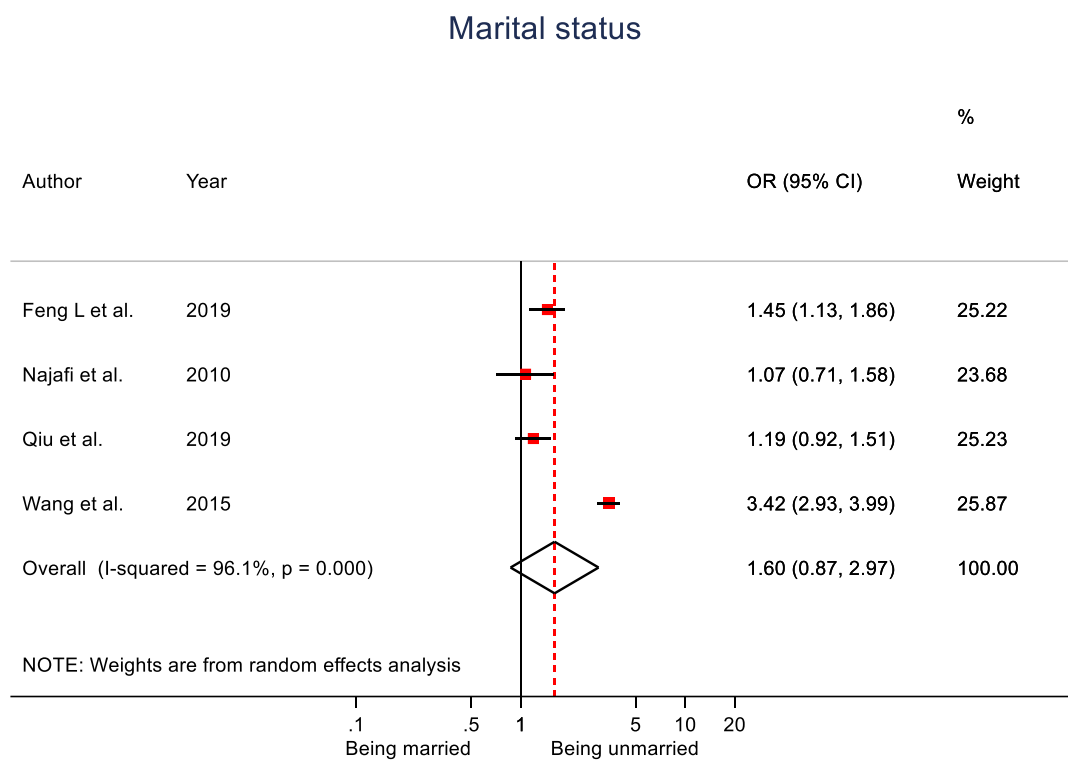

**Fig S21. Meta-analysis of association between chronic kidney disease and hyperuricaemia (yes or no).**

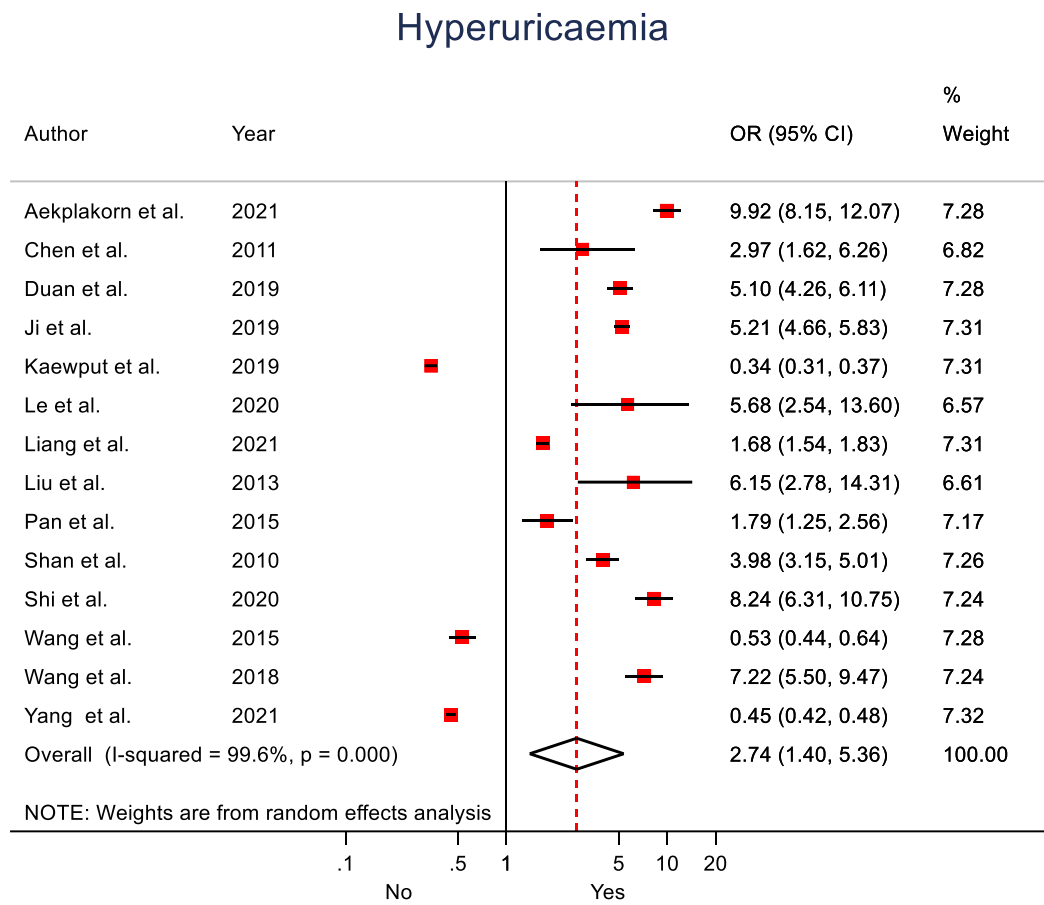



**Fig S22. Meta-analysis of association between chronic kidney disease and anemia (yes or no).**

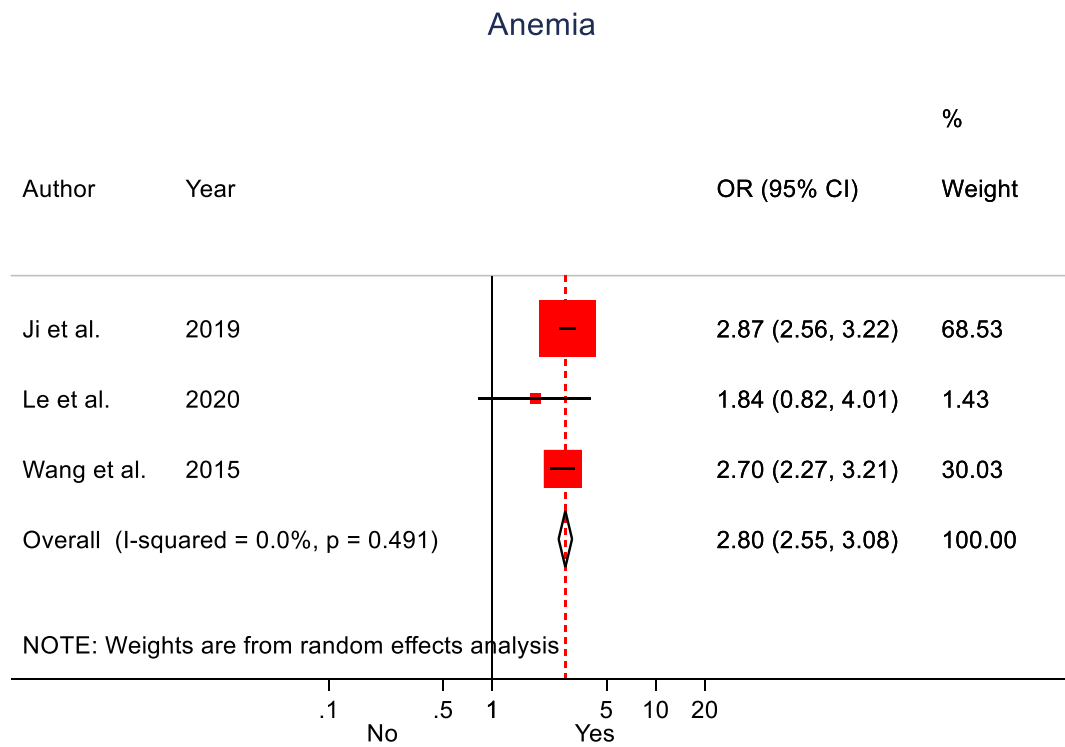

**Fig S23. Meta-analysis of association between chronic kidney disease and smoking status (current smoker or non-smoker).**

### Smoking status

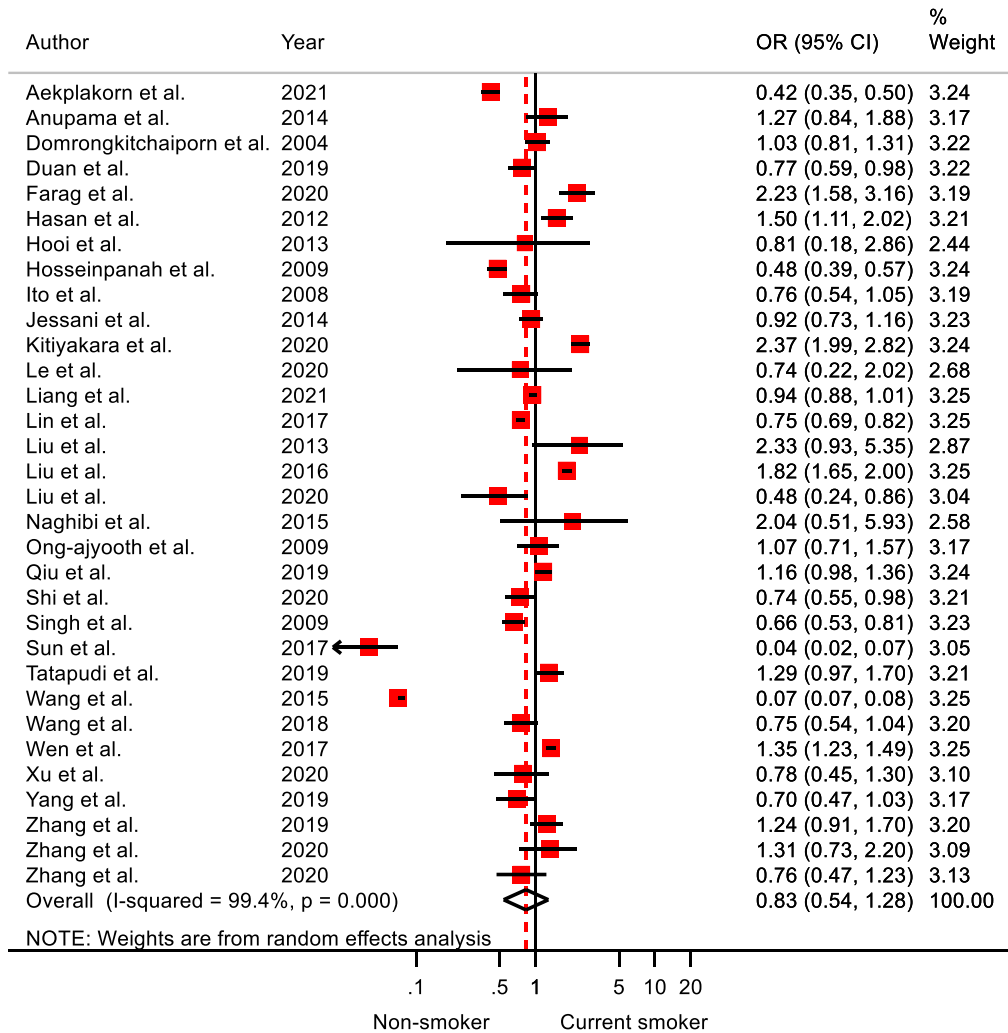

**Fig S24. Meta-analysis of association between chronic kidney disease and alcohol consumption (current drinker or non-drinker).**

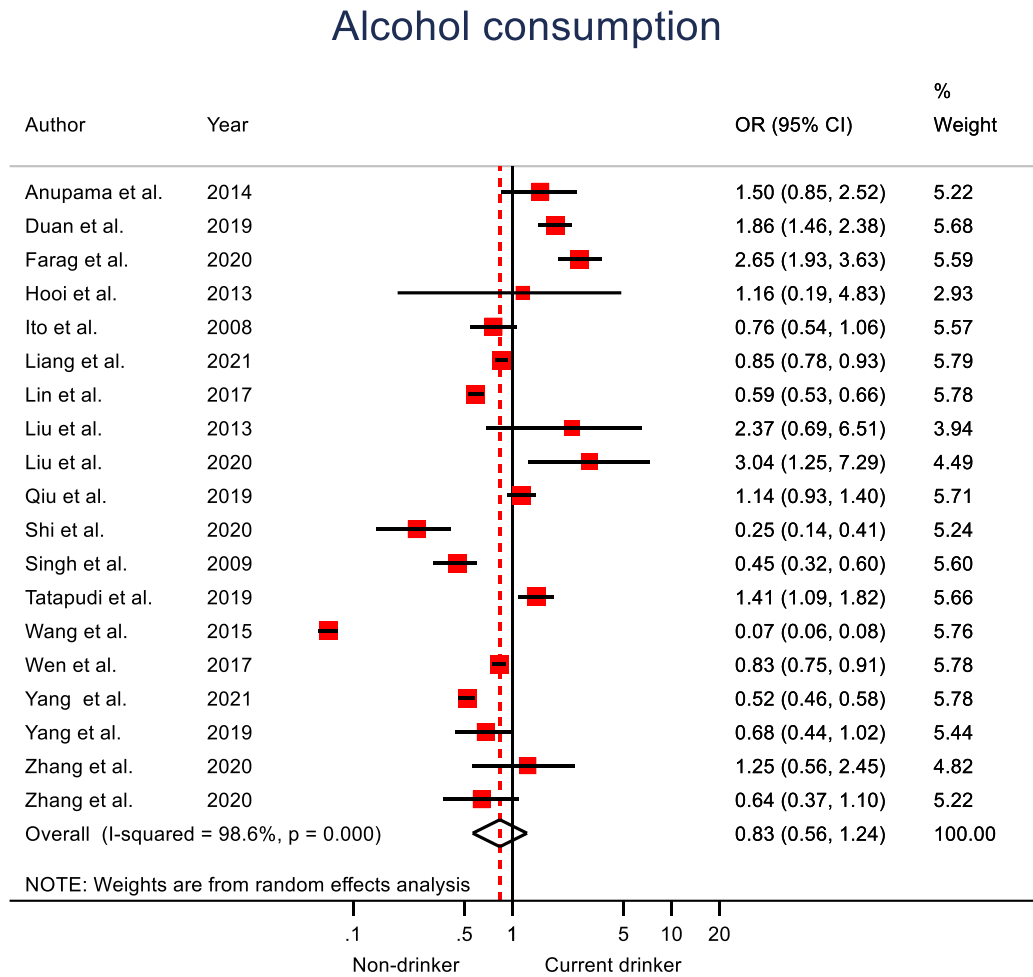

**Fig S25. Meta-analysis of association between chronic kidney disease and family history of hypertension (yes or no).**

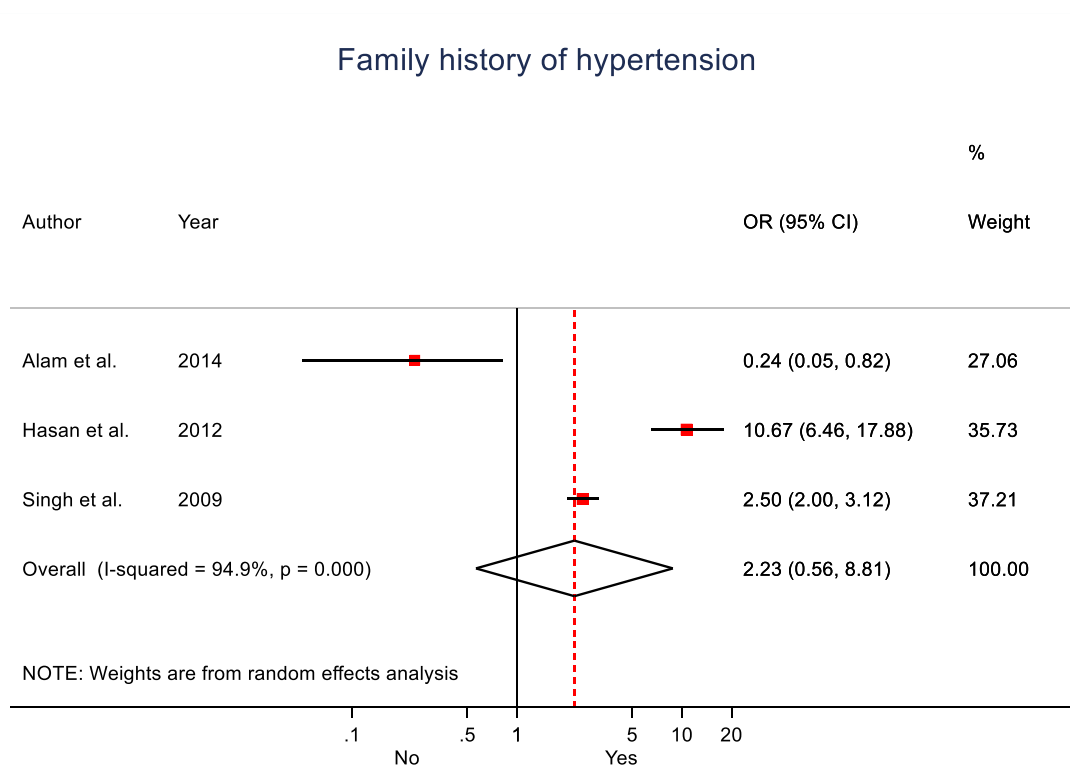

**Fig S26. Meta-analysis of association between chronic kidney disease and family history of chronic kidney disease (yes or no).**

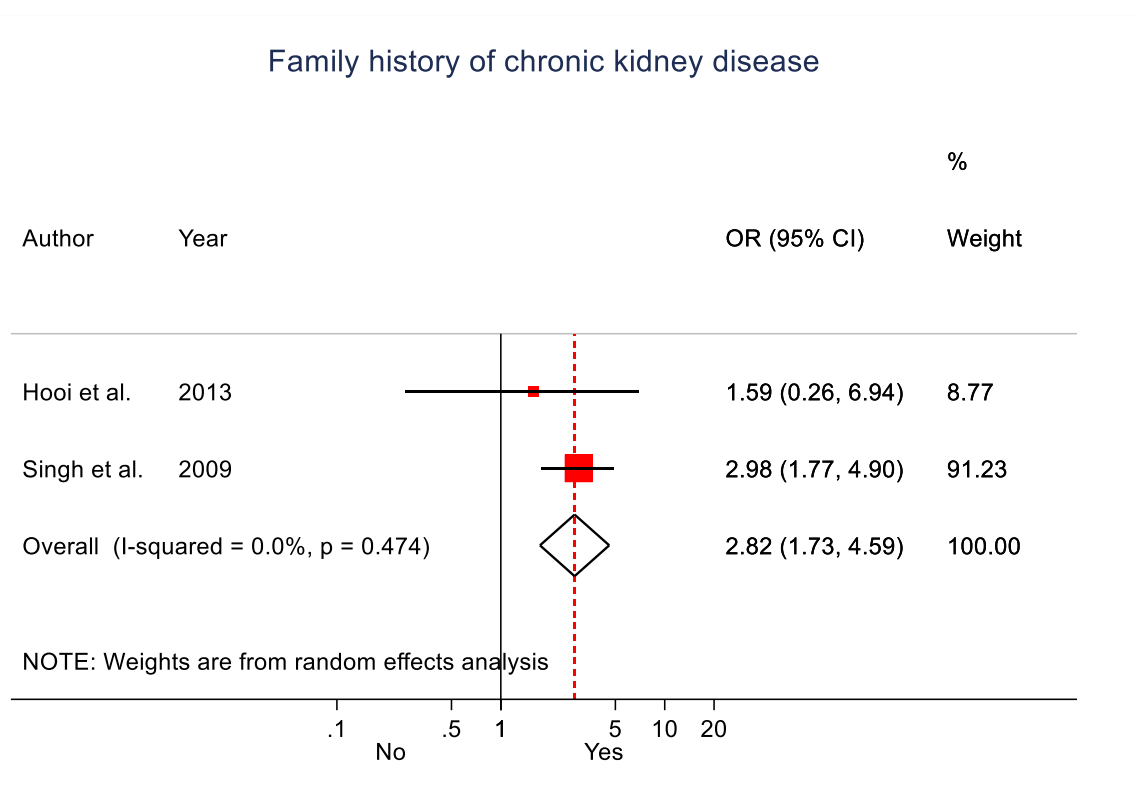

**Fig S27. Meta-analysis of association between chronic kidney disease and physical activity (inactive or active).**

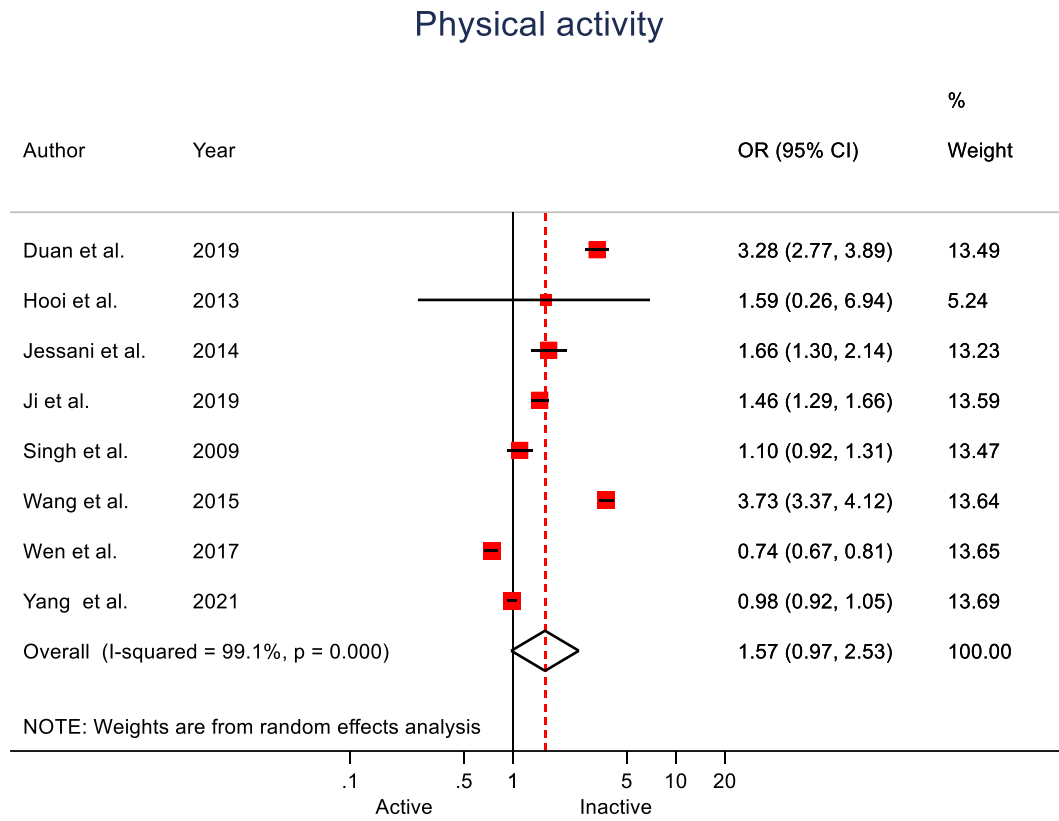

**Fig S28. Meta-analysis of association between chronic kidney disease and nonsteroidal anti-inflammatory drugs: NSAIDs use (yes or no).**

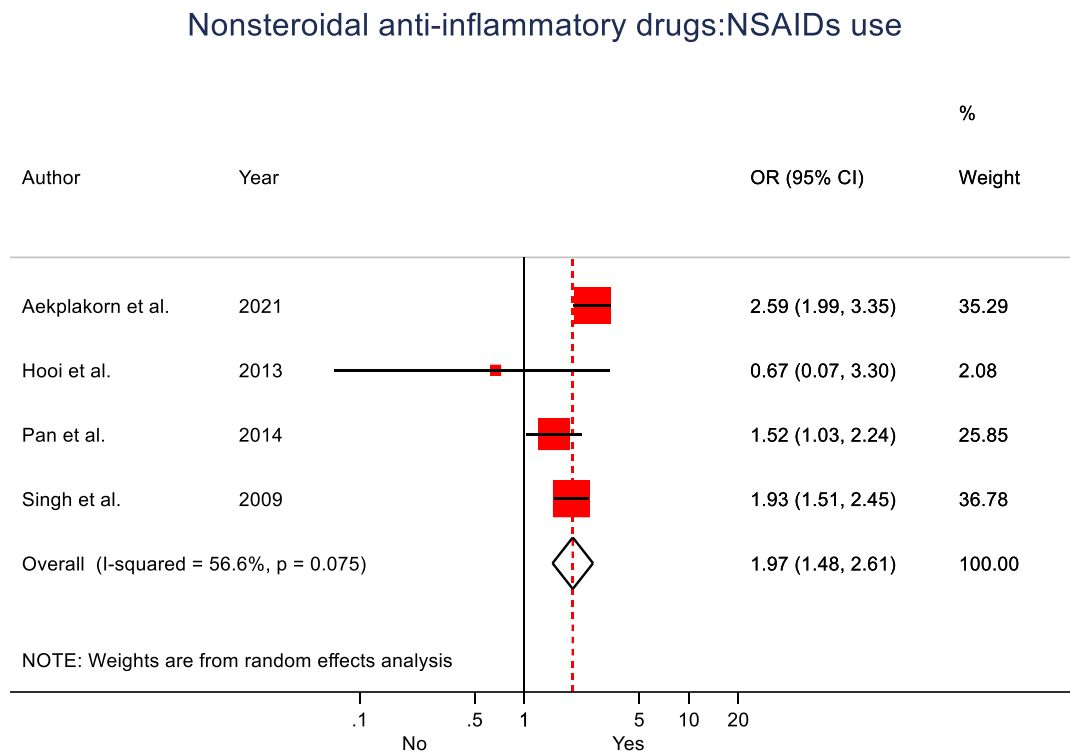



**Fig S29. Meta-analysis of association between chronic kidney disease and CD4 cell count in HIV patients ( $\geq 200$  or  $< 200$  cells/ml).**

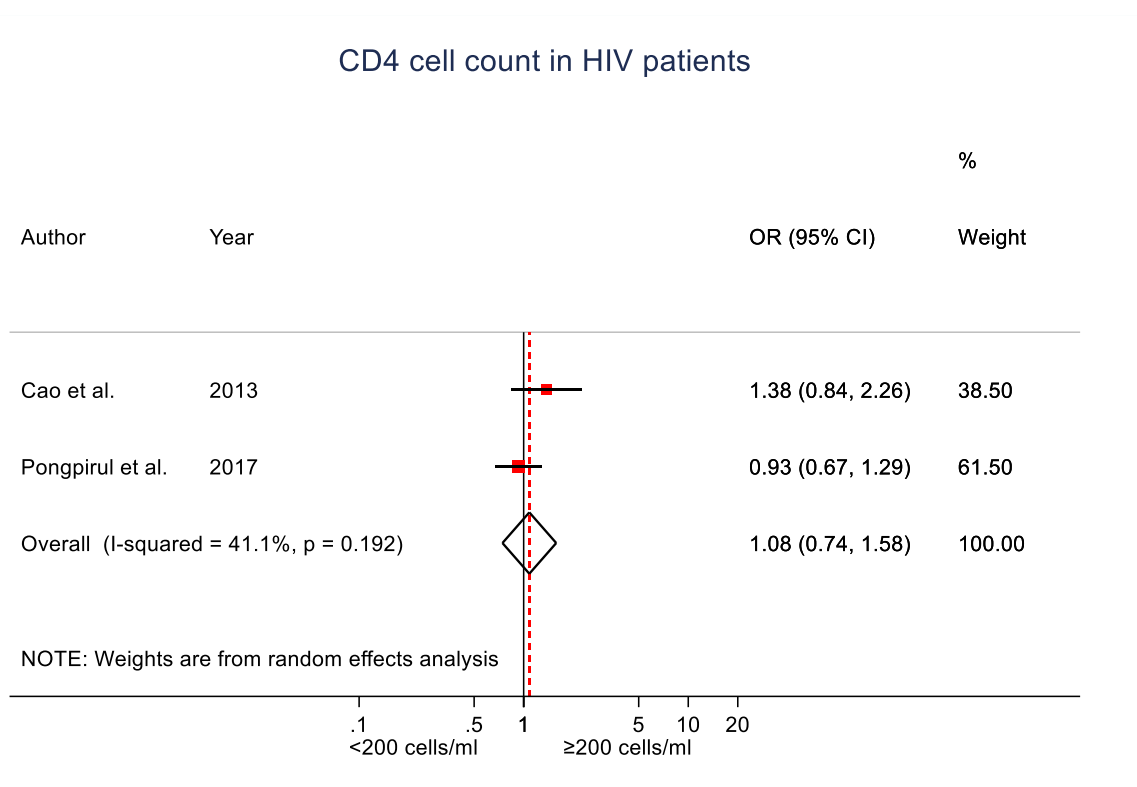

Supplement: pone.0264393.s006.pdf [file pone.0264393.s006.pdf]
