# Supplementary material for: Prevalence of chronic kidney disease stages 3–5 in low- and middle-income countries in Asia: A systematic review and meta-analysis
Source: PubMed Central journal article supplement (PMC8880400; doi:10.1371/journal.pone.0264393), 2022-02-25
Supplement: pone.0264393.s003.pdf [file pone.0264393.s003.pdf]

**S3 Appendix. List of low- and middle- income counties in Asia [1, 2].**

|          |                                                                                                                                          |          |                                                                                                                                                     |
|----------|------------------------------------------------------------------------------------------------------------------------------------------|----------|-----------------------------------------------------------------------------------------------------------------------------------------------------|
| <b>A</b> | <ul style="list-style-type: none"> <li>• Afghanistan</li> <li>• Armenia</li> <li>• Azerbaijan</li> </ul>                                 | <b>N</b> | <ul style="list-style-type: none"> <li>• Nepal</li> <li>• North Korea</li> </ul>                                                                    |
| <b>B</b> | <ul style="list-style-type: none"> <li>• Bahrain</li> <li>• Bangladesh</li> <li>• Bhutan</li> </ul>                                      | <b>P</b> | <ul style="list-style-type: none"> <li>• Pakistan</li> <li>• Palestine</li> <li>• Philippines</li> </ul>                                            |
| <b>C</b> | <ul style="list-style-type: none"> <li>• Cambodia</li> <li>• China</li> <li>• Cyprus</li> </ul>                                          | <b>R</b> | <ul style="list-style-type: none"> <li>• Russia</li> </ul>                                                                                          |
| <b>G</b> | <ul style="list-style-type: none"> <li>• Georgia</li> </ul>                                                                              | <b>S</b> | <ul style="list-style-type: none"> <li>• Sri Lanka</li> <li>• Syria</li> </ul>                                                                      |
| <b>I</b> | <ul style="list-style-type: none"> <li>• India</li> <li>• Indonesia</li> <li>• Iran</li> <li>• Iraq</li> <li>• Israel</li> </ul>         | <b>T</b> | <ul style="list-style-type: none"> <li>• Tajikistan</li> <li>• Thailand</li> <li>• Timor-Leste</li> <li>• Turkey</li> <li>• Turkmenistan</li> </ul> |
| <b>J</b> | <ul style="list-style-type: none"> <li>• Jordan</li> </ul>                                                                               | <b>U</b> | <ul style="list-style-type: none"> <li>• Uzbekistan</li> </ul>                                                                                      |
| <b>K</b> | <ul style="list-style-type: none"> <li>• Kazakhstan</li> <li>• Kuwait</li> <li>• Kyrgyzstan</li> </ul>                                   | <b>V</b> | <ul style="list-style-type: none"> <li>• Vietnam</li> </ul>                                                                                         |
| <b>L</b> | <ul style="list-style-type: none"> <li>• Laos</li> <li>• Lebanon</li> </ul>                                                              | <b>Y</b> | <ul style="list-style-type: none"> <li>• Yemen</li> </ul>                                                                                           |
| <b>M</b> | <ul style="list-style-type: none"> <li>• Malaysia</li> <li>• Maldives</li> <li>• Mongolia</li> <li>• Myanmar (formerly Burma)</li> </ul> |          |                                                                                                                                                     |

**Reference to LMIC in Asia**

1. COUNTRIES-ofthe-WORLD.COM [Internet]. List of countries in Asia 2020 [cited 2020 Nov 6]. Available from: <https://www.countries-ofthe-world.com/>.
2. Current classification by income [Internet]. 2029 [cited 15 Jan 2021]. Available from: <https://datahelpdesk.worldbank.org/knowledgebase/articles/906519>.
