# Supplementary material for: Prevalence of chronic kidney disease stages 3–5 in low- and middle-income countries in Asia: A systematic review and meta-analysis
Source: PubMed Central journal article supplement (PMC8880400; doi:10.1371/journal.pone.0264393), 2022-02-25
Supplement: pone.0264393.s004.pdf [file pone.0264393.s004.pdf]

## **S4 Appendix. Keyword search and search strategy.**

### **1. Keyword search**

We would search the databases using the following free text and exploded MeSH terms:

**1. Prevalence:** prevalence, epidemiology, and burden

**2. Chronic kidney disease:** CKD, chronic kidney disease, chronic renal failure, chronic kidney failure, chronic renal insufficiency, chronic kidney insufficiency, ESRD, and end stage renal disease.

**3. Region:** Asia

### **2. Search strategy**

#### **Period of searching:**

We searched the literature that published from inception until 30th Nov, 2021

**Table S1. Systematic Review Search Strategy: between the group of prevalence key search, chronic kidney disease key search, and Asia**

| <b>Database</b> | <b>Search term</b>                              | <b>No. of Article</b> |
|-----------------|-------------------------------------------------|-----------------------|
| PubMed/Medline  | #1 “renal insufficiency, chronic” [MeSH]        | 124,666               |
|                 | #2 “kidney failure, chronic” [MeSH]             | 97,581                |
|                 | #3 “CKD”                                        | 36,347                |
|                 | #4 “chronic kidney disease”                     | 60,855                |
|                 | #5 “chronic renal failure”                      | 24,343                |
|                 | #6 “chronic kidney insufficiency”               | 234                   |
|                 | #7 “ESRD”                                       | 18,113                |
|                 | #8 “end stage renal disease”                    | 36,079                |
|                 | #9 #1 OR #2 OR #3 OR #4 OR #5 OR #6 OR #7 OR #8 | 179,175               |
|                 | #10 "prevalence"[Mesh]                          | 322,575               |
|                 | #11 "epidemiology"[Mesh]                        | 27,861                |
|                 | #12 "burden"                                    | 271,927               |
|                 | #13 #10 OR #11 OR #12                           | 603,328               |
|                 | #14 “asia” [Mesh]                               | 948,389               |
|                 | #15 #9 AND #13                                  | 11,063                |
|                 | #16 #15 AND #14                                 | 1,774                 |

| <b>Database</b> | <b>Search term</b>                              | <b>No. of Article</b> |
|-----------------|-------------------------------------------------|-----------------------|
| ScienceDirect   | #1 "chronic renal insufficiency"                | 1,154                 |
|                 | #2 "chronic kidney failure"                     | 363                   |
|                 | #3 "CKD"                                        | 10,135                |
|                 | #4 "chronic kidney disease"                     | 18,271                |
|                 | #5 "chronic renal failure"                      | 5,573                 |
|                 | #6 "chronic kidney insufficiency"               | 24                    |
|                 | #7 "ESRD"                                       | 4,947                 |
|                 | #8 "end stage renal disease"                    | 10,476                |
|                 | #9 #1 OR #2 OR #3 OR #4 OR #5 OR #6 OR #7 OR #8 | 35,843                |
|                 | #10 "prevalence"                                | 193,000               |
|                 | #11 "epidemiology"                              | 67,363                |
|                 | #12 "burden"                                    | 87,989                |
|                 | #13 #10 OR #11 OR #12                           | 324,979               |
|                 | #14 "asia*"                                     | 73,384                |
|                 | #15 #9 AND #13                                  | 5,857                 |
|                 | #16 #15 AND #14                                 | 208                   |
| Scopus          | #1 "chronic renal insufficiency"                | 6,280                 |
|                 | #2 "chronic kidney failure"                     | 108,253               |

| <b>Database</b>  | <b>Search term</b>                                     | <b>No. of Article</b> |
|------------------|--------------------------------------------------------|-----------------------|
|                  | <b>#3</b> “CKD”                                        | 39,955                |
|                  | <b>#4</b> “chronic kidney disease”                     | 81,552                |
|                  | <b>#5</b> “chronic renal failure”                      | 31,472                |
|                  | <b>#6</b> “chronic kidney insufficiency”               | 205                   |
|                  | <b>#7</b> “ESRD”                                       | 20,088                |
|                  | <b>#8</b> “end stage renal disease”                    | 54,312                |
|                  | <b>#9</b> #1 OR #2 OR #3 OR #4 OR #5 OR #6 OR #7 OR #8 | 210,898               |
|                  | <b>#10</b> "prevalence"                                | 1,108,724             |
|                  | <b>#11</b> "epidemiology"                              | 639,769               |
|                  | <b>#12</b> "burden"                                    | 408,616               |
|                  | <b>#13</b> #10 OR #11 OR #12                           | 1,973,200             |
|                  | <b>#14</b> “asia*”                                     | 656,027               |
|                  | <b>#15</b> #9 AND #13                                  | 32,712                |
|                  | <b>#16</b> #15 AND #14                                 | 1,201                 |
| Cochrane Library | <b>#1</b> “renal insufficiency, chronic” [MeSH]        | 7,192                 |
|                  | <b>#2</b> “kidney failure,chronic” [MeSH]              | 4,867                 |
|                  | <b>#3</b> “CKD”                                        | 6,322                 |
|                  | <b>#4</b> “chronic kidney disease”                     | 8,734                 |

| <b>Database</b> | <b>Search term</b>                              | <b>No. of Article</b> |
|-----------------|-------------------------------------------------|-----------------------|
|                 | #5 "chronic renal failure"                      | 2,158                 |
|                 | #6 "chronic kidney insufficiency"               | 15                    |
|                 | #7 "ESRD"                                       | 2,225                 |
|                 | #8 "end stage renal disease"                    | 4,408                 |
|                 | #9 #1 OR #2 OR #3 OR #4 OR #5 OR #6 OR #7 OR #8 | 17,080                |
|                 | #10 "prevalence"[Mesh]                          | 4,881                 |
|                 | #11 "epidemiology"[Mesh]                        | 42                    |
|                 | #12 "burden"                                    | 27,549                |
|                 | #13 #10 OR #11 OR #12                           | 31,264                |
|                 | #14 "asia" [Mesh]                               | 22,353                |
|                 | #15 #9 AND #13                                  | 609                   |
|                 | #16 #15 AND #14                                 | 20                    |
| EMBASE          | #1 "chronic renal insufficiency"                | 33,167                |
|                 | #2 "chronic kidney failure"                     | 47,549                |
|                 | #3 "CKD"                                        | 30,071                |
|                 | #4 "chronic kidney disease"                     | 51,608                |
|                 | #5 "chronic renal failure"                      | 34,184                |
|                 | #6 "chronic kidney insufficiency"               | 29,764                |

| <b>Database</b>                          | <b>Search term</b>                              | <b>No. of Article</b> |
|------------------------------------------|-------------------------------------------------|-----------------------|
|                                          | #7 "ESRD"                                       | 18,135                |
|                                          | #8 "end stage renal disease"                    | 30,557                |
|                                          | #9 #1 OR #2 OR #3 OR #4 OR #5 OR #6 OR #7 OR #8 | 77,935                |
|                                          | #10 "prevalence"                                | 339,289               |
|                                          | #11 "epidemiology"                              | 1,044,294             |
|                                          | #12 "burden"                                    | 158,573               |
|                                          | #13 #10 OR #11 OR #12                           | 1,264,167             |
|                                          | #14 "asia*"                                     | 143,365               |
|                                          | #15 #9 AND #13                                  | 31,886                |
|                                          | #16 #15 AND #14                                 | 1,306                 |
| Thai Library Integrated System (ThaiLIS) | #1 "chronic renal insufficiency"                | 0                     |
|                                          | #2 "chronic kidney failure"                     | 0                     |
|                                          | #3 "CKD"                                        | 165                   |
|                                          | #4 "chronic kidney disease"                     | 115                   |
|                                          | #5 "chronic renal failure"                      | 63                    |
|                                          | #6 "chronic kidney insufficiency"               | 0                     |
|                                          | #7 "ESRD"                                       | 29                    |

| <b>Database</b>      | <b>Search term</b>                              | <b>No. of Article</b> |
|----------------------|-------------------------------------------------|-----------------------|
|                      | #8 "end stage renal disease"                    | 47                    |
|                      | #9 #1 OR #2 OR #3 OR #4 OR #5 OR #6 OR #7 OR #8 | 390                   |
|                      | #10 "prevalence"                                | 1,562                 |
|                      | #11 "epidemiology"                              | 557                   |
|                      | #12 "burden"                                    | 768                   |
|                      | #13 #10 OR #11 OR #12                           | 2,755                 |
|                      | #14 "asia"                                      | 3,025                 |
|                      | #15 #9 AND #13                                  | 2                     |
|                      | #16 #15 AND #14                                 | 2                     |
| Thai Thesis Database | #1 "chronic renal insufficiency"                | 0                     |
|                      | #2 "chronic kidney failure"                     | 2                     |
|                      | #3 "CKD"                                        | 149                   |
|                      | #4 "chronic kidney disease"                     | 102                   |
|                      | #5 "chronic renal failure"                      | 62                    |
|                      | #6 "chronic kidney insufficiency"               | 0                     |
|                      | #7 "ESRD"                                       | 26                    |
|                      | #8 "end stage renal disease"                    | 43                    |

| <b>Database</b>                | <b>Search term</b>                                     | <b>No. of Article</b> |
|--------------------------------|--------------------------------------------------------|-----------------------|
|                                | <b>#9</b> #1 OR #2 OR #3 OR #4 OR #5 OR #6 OR #7 OR #8 | 336                   |
|                                | <b>#10</b> "prevalence"                                | 1,428                 |
|                                | <b>#11</b> "epidemiology"                              | 539                   |
|                                | <b>#12</b> "burden"                                    | 705                   |
|                                | <b>#13</b> #10 OR #11 OR #12                           | 2,549                 |
|                                | <b>#14</b> "asia"                                      | 2,692                 |
|                                | <b>#15</b> #9 AND #13                                  | 0                     |
|                                | <b>#16</b> #15 AND #14                                 | 0                     |
| Grey Literature<br>(OpenSIGLE) | <b>#1</b> "chronic renal insufficiency"                | 16                    |
|                                | <b>#2</b> "chronic kidney failure"                     | 46                    |
|                                | <b>#3</b> "CKD"                                        | 58                    |
|                                | <b>#4</b> "chronic kidney disease"                     | 113                   |
|                                | <b>#5</b> "chronic renal failure"                      | 115                   |
|                                | <b>#6</b> "chronic kidney insufficiency"               | 3                     |
|                                | <b>#7</b> "ESRD"                                       | 20                    |
|                                | <b>#8</b> "end stage renal disease"                    | 61                    |
|                                | <b>#9</b> #1 OR #2 OR #3 OR #4 OR #5 OR #6 OR #7 OR #8 | 287                   |



| Database | Search term           | No. of Article |
|----------|-----------------------|----------------|
|          | #10 "prevalence"      | 3,612          |
|          | #11 "epidemiology"    | 2,221          |
|          | #12 "burden"          | 987            |
|          | #13 #10 OR #11 OR #12 | 6,524          |
|          | #14 "asia*"           | 3,523          |
|          | #15 #9 AND #13        | 28             |
|          | #16 #15 AND #14       | 0              |
