# Supplementary material for: Prevalence of chronic kidney disease stages 3–5 in low- and middle-income countries in Asia: A systematic review and meta-analysis
Source: PubMed Central journal article supplement (PMC8880400; doi:10.1371/journal.pone.0264393), 2022-02-25
Supplement: pone.0264393.s005.pdf [file pone.0264393.s005.pdf]

**S5 Appendix. Characteristic of included studies and Newcastle-Ottawa quality assessment scale (NOS).**

Abbreviations:

eGFR, estimated glomerular filtration rate; CKD, chronic kidney disease; EPI, epidemiology collaboration equation; MDRD<sub>186</sub>, Modification of Diet in Renal Disease Study with constant factor of 186; MDRD<sub>175</sub>, Modification of Diet in Renal Disease Study with constant factor of 175; N/A, not applicable from studies.

**Table S3.** Characteristic of studies included in the meta-analysis.

| Author                              | Year | Country                            | Targeted-population                                                                   | Number of participants                       | Male (%)                                          | HT (%) | DM (%) | Medication use (%) | Study design          | eGFR equation | Newcastle-Ottawa Scale |
|-------------------------------------|------|------------------------------------|---------------------------------------------------------------------------------------|----------------------------------------------|---------------------------------------------------|--------|--------|--------------------|-----------------------|---------------|------------------------|
| Aekplakorn et al. *, † [1]          | 2021 | Thailand                           | Age ≥20 years                                                                         | 17,329                                       | 48                                                | 28.5   | 9.8    | -                  | Cross-sectional study | CKD-EPI       | High                   |
| Alam et al. *, † [2]                | 2014 | Pakistan                           | Age ≥15 years                                                                         | 350                                          | 36                                                | 20.9   | 8.6    | -                  | Cross-sectional study | MDRD 186      | High                   |
| Anand et al. *, † [3]               | 2014 | Bangladesh                         | Age >30 years                                                                         | 357                                          | 51                                                | 37.2   | -      | -                  | Cross-sectional study | CKD-EPI       | High                   |
| Anand et al. *, † [4]               | 2017 | India                              | Age >40 years without self-reported heart disease or stroke                           | 5,294                                        | 48.4                                              | 37.0   | 23.7   | -                  | Cross-sectional study | CKD-EPI       | High                   |
| Anupama et al. *, † [5]             | 2014 | India                              | Age ≥18 years                                                                         | 2,091                                        | 45.6                                              | 33.6   | 3.8    | -                  | Cross-sectional study | MDRD 186      | High                   |
| Anupama et al. *, † [6]             | 2017 | India                              | Age ≥18 years                                                                         | 1,331                                        | 44                                                | 32.6   | 6.6    | -                  | Cross-sectional study | MDRD 186      | High                   |
| Bahadoran et al.* [7]               | 2016 | Iran                               | Age ≥20 years                                                                         | 3,462                                        | 13.4                                              | 17.9   | 11.5   | -                  | Cross-sectional study | CKD-EPI       | High                   |
| Bragg-Gresham et al. * [8]          | 2020 | India                              | Age range of 18 - 69 years                                                            | 2,002                                        | 58.2                                              | 48.2   | 4.0    | -                  | Cross-sectional study | CKD-EPI       | High                   |
| Cao et al. *, † [9]                 | 2013 | China                              | Age >18 years, all HIV-infected and ART-naïve patients                                | 538                                          | 74.2                                              | 2.8    | -      | -                  | Cross-sectional study | MDRD 186      | High                   |
| Chen et al.* [10]                   | 2008 | China                              | Age ≥20 years                                                                         | 6,101                                        | -                                                 | 19.2   | 5.5    | -                  | Cross-sectional study | eMDRD 175     | High                   |
| Chen et al. *, † [11]               | 2011 | China                              | Age ≥18 years                                                                         | 1,289                                        | -                                                 | 38.8   | 2.9    | -                  | Cross-sectional study | eMDRD 175     | High                   |
| Das et al. * [12]                   | 2019 | Bangladesh                         | Age ≥19 years                                                                         | 218,888                                      | 56.6                                              | -      | -      | -                  | Cross-sectional study | CKD-EPI       | High                   |
| Dhimal et al.* [13]                 | 2019 | Nepal                              | Age ≥20 years                                                                         | 13,200                                       | 42.2                                              | -      | 8.5    | -                  | Cross-sectional study | N/A           | Moderate               |
| Ding et al. * [14]                  | 2012 | China                              | Men ≥55 years and women ≥65 years with stable premature coronary artery disease (CAD) | 512                                          | 41                                                | 68     | 18.8   | -                  | Cohort study          | MDRD 186      | Moderate               |
| Domrongkitthaiporn et al. *, † [15] | 2004 | Thailand                           | Age range of 35 - 54 years                                                            | 3,499                                        | 77.2                                              | -      | 6.8    | -                  | Cohort study          | MDRD 186      | Moderate               |
| Du et al. *, † [16]                 | 2017 | China                              | Age range of 20 - 49 years, married group                                             | 3,091,379                                    | 48.3                                              | 4.1    | 0.7    | -                  | Cross-sectional study | CKD-EPI       | Moderate               |
| Duan et al. *, † [17]               | 2019 | China                              | Age ≥18 years                                                                         | 23,869                                       | 40.2                                              | 28.9   | 11.4   | -                  | Cross-sectional study | CKD-EPI       | High                   |
| Fan et al.* [18]                    | 2013 | China                              | Age range of 18 - 74 years                                                            | 4,473                                        | 46.7                                              | -      | -      | -                  | Cross-sectional study | CKD-EPI       | High                   |
| Farag et al. *, † [19]              | 2020 | India                              | Age ≥18 years                                                                         | 1,184                                        | 44.0                                              | 45.5   | 22.1   | -                  | Cross-sectional study | CKD-EPI       | Moderate               |
| Farhadnejad et al.* [20]            | 2019 | Tehran, Iran                       | Age ≥20 years                                                                         | 1,797                                        | 48                                                | 17.7   | 11.7   | -                  | Cross-sectional study | MDRD 186      | High                   |
| Fatema et al.* [21]                 | 2013 | Bangladesh                         | Age ≥18 years                                                                         | 634                                          | 88.3                                              | 25.2   | 8.5    | -                  | Cross-sectional study | MDRD 186      | Moderate               |
| Feng et al. *, † [22]               | 2019 | Bangladesh, Pakistan and Sri Lanka | Age ≥40 years, hypertensive adults                                                    | Bangladesh:868, Pakistan: 685, Sri Lanka:796 | Bangladesh: 36.2, Pakistan: 39.3, Sri Lanka: 31.7 | 100.0  | 26.7   | -                  | Cross-sectional study | CKD-EPI       | High                   |

| Author                       | Year | Country    | Targeted-population                                | Number of participants | Male (%) | HT (%) | DM (%) | Medication use (%) | Study design          | eGFR equation | Newcastle-Ottawa Scale |
|------------------------------|------|------------|----------------------------------------------------|------------------------|----------|--------|--------|--------------------|-----------------------|---------------|------------------------|
| Gallieni et al.* [23]        | 2013 | India      | Age ≥30 years                                      | 1,526                  | 42.7     | 39.4   | -      | -                  | Cross-sectional study | MDRD 186      | High                   |
| Guo et al.* [24]             | 2017 | China      | Elderly patients with type 2 Diabetes mellitus     | 21,723                 | 48.7     | 62.4   | 100.0  | -                  | Cross-sectional study | CKD-EPI       | Moderate               |
| Han et al.* [25]             | 2019 | China      | Age ≥60 years                                      | 966                    | 18.1     | 23.5   | 5.0    | -                  | Cross-sectional study | CKD-EPI       | Moderate               |
| Hasan et al. *, † [26]       | 2012 | Bangladesh | Age range of 18-65 years                           | 1,240                  | 52.4     | 23.2   | 10.4   | -                  | Cross-sectional study | MDRD 186      | Moderate               |
| He et al.*, † [27]           | 2016 | China      | Age ≥20 years, Chinese urban adults                | 123,629                | 63.2     | 23.1   | 6.6    | -                  | Cross-sectional study | eMDRD 175     | High                   |
| Herath et al.*, † [28]       | 2019 | Sri Lanka  | Age range of 18-93 years, healthy people           | 7,768                  | 28.9     | -      | -      | -                  | Cross-sectional study | CKD-EPI       | Moderate               |
| Hong et al.*, † [29]         | 2015 | China      | Age ≥18 years                                      | 41,131                 | 41.9     | 33.5   | 7.5    | -                  | Cross-sectional study | eMDRD 175     | High                   |
| Hooi et al. *, † [30]        | 2013 | Malaysia   | Age >18 years                                      | 876                    | 47.9     | 38.4   | 19.6   | NSAIDs 18.8        | Cross-sectional study | CKD-EPI       | Moderate               |
| Hosseinpanah et al.*, † [31] | 2009 | Iran       | Age >20 years                                      | 10,063                 | 42       | 25.8   | 13.7   | -                  | Cross-sectional study | MDRD 186      | High                   |
| Huda et al.* [32]            | 2012 | Bangladesh | Age range of 15-65 years                           | 1,000                  | 33.4     | 11.6   | 4.1    | -                  | Cross-sectional study | MDRD 186      | Moderate               |
| Hussain et al.*, † [33]      | 2019 | India      | Age ≥18 years                                      | 323                    | 48.3     | 68.4   | 100.0  | -                  | Cross-sectional study | CKD-EPI       | High                   |
| Imran et al.* [34]           | 2015 | Pakistan   | Age ≥30 years                                      | 293                    | 65       | 29.2   | 24.0   | -                  | Cross-sectional study | CKD-EPI       | Moderate               |
| Ingsathit et al. *, † [35]   | 2009 | Thailand   | Age ≥18 years                                      | 3,459                  | 45.5     | 27.5   | 11.9   | -                  | Cross-sectional study | eMDRD 175     | High                   |
| Ito et al.*, † [36]          | 2008 | Vietnam    | Age >40 years                                      | 8,505                  | 35.2     | 30.5   | -      | NSAIDs 0.1         | Cross-sectional study | MDRD 186      | High                   |
| Jafar et al.* [37]           | 2005 | Pakistan   | Age ≥40 years                                      | 262                    | 54.2     | 48.9   | 10.7   | -                  | Cross-sectional study | MDRD 186      | High                   |
| Jessani et al.*, † [38]      | 2014 | Pakistan   | Age ≥40 years                                      | 2,873                  | 47.8     | 44.9   | 21.4   | -                  | Cross-sectional study | CKD-EPI       | High                   |
| Ji et al.* [39]              | 2017 | China      | Age >65 years                                      | 1,586                  | 44.6     | 52.6   | 19.6   | -                  | Cross-sectional study | CKD-EPI       | High                   |
| Ji et al.*, † [40]           | 2019 | China      | Age ≥60 years                                      | 34,588                 | 43.3     | 70.6   | 24.8   | -                  | Cross-sectional study | eMDRD 175     | High                   |
| Jiang et al.*, † [41]        | 2011 | China      | Age ≥30 years                                      | 4,944                  | 44.9     | 10.6   | 13.7   | -                  | Cross-sectional study | eMDRD 175     | High                   |
| Kaewput et al.*, † [42]      | 2019 | Thailand   | Age ≥20 years, hypertension patients               | 9,776                  | 44.1     | 100.0  | 11.7   | -                  | Cross-sectional study | CKD-EPI       | High                   |
| Khajehdehi et al.*, † [43]   | 2014 | Iran       | Age ≥18 years                                      | 9,404                  | 35.9     | -      | -      | -                  | Cross-sectional study | MDRD 186      | Moderate               |
| Khanam et al. *, † [44]      | 2016 | Bangladesh | Age range of 18–80 years, type 2 diabetic patients | 1,317                  | 54.7     | 16.7   | 100.0  | -                  | Cross-sectional study | eMDRD 175     | Moderate               |
| Kitiyakara et al.* [45]      | 2012 | Thailand   | All age groups                                     | 5,526                  | 75       | 36.3   | 11.6   | -                  | Cross-sectional study | CKD-EPI       | Moderate               |
| Kitiyakara et al. *, † [46]  | 2020 | Thailand   | Age range of 35-54 years                           | 3,334                  | 76.6     | 19.3   | 6.6    | -                  | Cross-sectional study | CKD-EPI       | High                   |
| Le et al.*, † [47]           | 2020 | Vietnam    | Age <80 years, type 2 diabetes patients            | 467                    | 37.3     | 85.9   | 100.0  | -                  | Cohort study          | CKD-EPI       | Moderate               |
| Li et al.*, † [48]           | 2014 | China      | , having metabolic syndrome                        | 1,724                  | 37.3     | -      | -      | -                  | Cross-sectional study | eMDRD 175     | High                   |
| Li et al. * [49]             | 2021 | China      | Age ≥18 years                                      | 47,204                 | 42.7     | 35.2   | 7.4    | -                  | Cross-sectional study | eMDRD 175     | High                   |

| Author                          | Year | Country                                | Targeted-population                                                | Number of participants                                      | Male (%) | HT (%) | DM (%) | Medication use (%)            | Study design          | eGFR equation | Newcastle-Ottawa Scale |
|---------------------------------|------|----------------------------------------|--------------------------------------------------------------------|-------------------------------------------------------------|----------|--------|--------|-------------------------------|-----------------------|---------------|------------------------|
| Liang et al. *, † [50]          | 2021 | China                                  | Age >18 years                                                      | 47,086                                                      | 42.6     | 34.1   | 23.3   | Nephrotoxic medications, 3.2% | Cross-sectional study | N/A           | Moderate               |
| Lin et al. *, † [51]            | 2017 | China                                  | Age ≥ 40 years                                                     | 250,752                                                     | 34.6     | 45.7   | 21.2   |                               | Cohort study          | CKD-EPI       | High                   |
| Liu et al. *, † [52]            | 2013 | China                                  | Acute coronary syndrome, with undiagnosed diabetes or pre-diabetes | 2,232                                                       | 66.4     | 19.2   | 11.0   | Nephrotoxic medications 2.8   | Cross-sectional study | eMDRD 175     | High                   |
| Liu et al. *, † [53]            | 2020 | China                                  | Age range of 37–84 years                                           | 1,434                                                       | 40.7     | -      | -      | -                             | Cohort study          | CKD-EPI       | Moderate               |
| Liu et al. *, † [54]            | 2013 | China                                  | Age range of 20-75 years with periodontal disease                  | 1,268                                                       | 33.3     | 90.6   | -      | -                             | Cross-sectional study | eMDRD 175     | High                   |
| Liu et al. *, † [55]            | 2016 | China                                  | Age range of 18 - 80 years                                         | 26,655                                                      | 58.5     | 15.7   | 2.9    | -                             | Cross-sectional study | eMDRD 175     | Moderate               |
| Lu et al.* [56]                 | 2016 | China                                  | Age ≥40 years                                                      | 239,832                                                     | N/A      | -      | -      | -                             | Cross-sectional study | CKD-EPI       | Moderate               |
| Luk et al.* [57]                | 2015 | China, India, Philippines, and Vietnam | Age ≥18 years with type 2 Diabetes mellitus                        | China:3,415, India: 3,714, Philippines: 3,364, Vietnam: 692 | N/A      | 88.0   | 100.0  | -                             | Cross-sectional study | MDRD 186      | Moderate               |
| Lv et al. *, † [58]             | 2020 | China                                  | Age >45 years                                                      | 6,267                                                       | 44.5     | 45.3   | 15.9   | -                             | Cross-sectional study | CKD-EPI       | High                   |
| Mahapatra et al.* [59]          | 2016 | India                                  | Age ≥18 years                                                      | 1,104                                                       | 61.4     | 23.6   | 11.2   | -                             | Cross-sectional study | MDRD 186      | Moderate               |
| Mahdavi-Mazdeh et al. *, † [60] | 2010 | Iran                                   | Age range of 18–86 years, taxi driver                              | 31,999                                                      | 98.4     | -      | -      | -                             | Cross-sectional study | MDRD 186      | Moderate               |
| Mohanty et al.* [61]            | 2020 | India                                  | Age range of 20–60 years                                           | 2,978                                                       | 37.3     | 11.7   | 5.7    | -                             | Cross-sectional study | MDRD 186      | High                   |
| Naghibi et al. *, † [62]        | 2015 | Iran                                   | Age range of 20–60 years                                           | 1,285                                                       | 41       | 22.0   | 10.5   | -                             | Cross-sectional study | MDRD 186      | Moderate               |
| Najafi et al. *, † [63]         | 2010 | Iran                                   | Age ≥18 years                                                      | 3,591                                                       | 39       | 90.3   | 49.7   | -                             | Cross-sectional study | MDRD 186      | Moderate               |
| Nampoothiri et al.* [64]        | 2019 | India                                  | Hepatic steatosis patients                                         | 100                                                         | 56       | 26.0   | 20.0   | -                             | Cross-sectional study | CG            | High                   |
| Nand et al.* [65]               | 2015 | India                                  | Age ≥20 years, having any metabolic syndrome                       | 300                                                         | 49.7     | -      | -      | -                             | Cross-sectional study | MDRD 186      | Moderate               |
| Naseem et al.* [66]             | 2017 | Pakistan                               | Age >18 years with essential hypertension                          | 772                                                         | 60       | 100.0  | 55.7   | -                             | Cross-sectional study | N/A           | Moderate               |
| Ong-ajyooth et al. *, † [67]    | 2009 | Thailand                               | Age ≥15 years                                                      | 3,117                                                       | 49.1     | 22.5   | 7.0    | -                             | Cross-sectional study | MDRD 186      | High                   |
| Pan et al. *, † [68]            | 2014 | China                                  | Age ≥18 years                                                      | 47,204                                                      | 42.7     | 14.7   | 3.4    | -                             | Cross-sectional study | eMDRD 175     | High                   |
| Pan et al. *, † [69]            | 2015 | China                                  | Age >18 years                                                      | 7,588                                                       | 47       | 35.4   | 7.4    | NSAIDs 3.6                    | Cross-sectional study | CKD-EPI       | High                   |
| Perkovic et al.* [70]           | 2007 | Thailand                               | Age ≥35 years                                                      | 5,146                                                       | 48.7     | 21.2   | 9.7    | -                             | Cross-sectional study | MDRD 186      | Moderate               |
| Pongpirul et al. *, † [71]      | 2017 | Thailand                               | Age >18 years, HIV patients                                        | 5,552                                                       | N/A      | 16.6   | 4.0    | -                             | Cohort study          | CKD-EPI       | Moderate               |
| Prodjosudjadi et al. *, † [72]  | 2009 | Indonesia                              | Age range of 18 - 70 years                                         | 9,412                                                       | 35.9     | 15     | 3.5    | -                             | Cross-sectional study | eMDRD 175     | Moderate               |

| Author                          | Year | Country                   | Targeted-population                                                                 | Number of participants                       | Male (%)                               | HT (%)                                    | DM (%)                       | Medication use (%) | Study design          | eGFR equation | Newcastle-Ottawa Scale |
|---------------------------------|------|---------------------------|-------------------------------------------------------------------------------------|----------------------------------------------|----------------------------------------|-------------------------------------------|------------------------------|--------------------|-----------------------|---------------|------------------------|
| Qiu et al. *, † [73]            | 2019 | China                     | Age ≥18 years                                                                       | 33,300                                       | 40.8                                   | 31.8                                      | 7.7                          | -                  | Cross-sectional study | CKD-EPI       | High                   |
| Rahim et al. *, † [74]          | 2017 | Bangladesh                | Type 2 Diabetes mellitus patients                                                   | 400                                          | 42.2                                   | 57.2                                      | 100.0                        |                    | Cross-sectional study | CKD-EPI       | Moderate               |
| Rai et al.* [75]                | 2019 | India                     | Overweight and obese general population                                             | 103                                          | 68                                     | 32.4                                      | 21.4                         | -                  | Cross-sectional study | eMDRD 175     | High                   |
| Rai et al.* [76]                | 2019 | India                     | Age ≥45 years                                                                       | 198                                          | 62.6                                   | 22.2                                      | 13.6                         | -                  | Cross-sectional study | eMDRD 175     | Moderate               |
| Rajput et al. * [77]            | 2017 | India                     | Age >18 years                                                                       | 3,000                                        | 54.0                                   | 53.8                                      | 100.0                        |                    | Cross-sectional study | eMDRD 175     | Moderate               |
| Ruwanpathirana et al. *, † [78] | 2019 | Sri Lanka                 | Age ≥18 years                                                                       | 4,803                                        | 31.8                                   | -                                         | -                            | -                  | Cross-sectional study | CKD-EPI       | High                   |
| Saber et al. *, † [79]          | 2017 | Iran                      | Age range of 15-75 years                                                            | 988                                          | 42                                     | 20.0                                      | 14.0                         | -                  | Cross-sectional study | MDRD 186      | Moderate               |
| Sahin et al. *, † [80]          | 2009 | Turkey                    | Age ≥18 years                                                                       | 1,079                                        | 49.4                                   | 38.1                                      | 5.3                          | -                  | Cross-sectional study | eMDRD 175     | Moderate               |
| Satirapoj et al. *, † [81]      | 2013 | Thailand                  | Age range of 15 - 60 years                                                          | 15,357                                       | 80.4                                   | 6.8                                       | 2.6                          | -                  | Cross-sectional study | eMDRD 175     | Moderate               |
| Sepanlou et al. *, † [82]       | 2017 | Iran                      | Age range of 40-75 years                                                            | 11,409                                       | 47.4                                   | 43.7                                      | 15.6                         | -                  | Cohort study          | MDRD 186      | Moderate               |
| Shan et al. *, † [83]           | 2010 | China                     | Age >40 years                                                                       | 3,981                                        | 54.7                                   | 15.0                                      | 5.8                          | -                  | Cross-sectional study | MDRD 186      | High                   |
| Sharma et al. * [84]            | 2010 | China, Mongolia and Nepal | China; age range of 15 - 75 years, Mongolia; age >18 years and Nepal; age ≥20 years | China; 1,999, Mongolia; 997 and Nepal; 8,398 | China; 27, Mongolia ; 26 and Nepal; 38 | China; 4.6, Mongolia; 10.0 and Nepal; 3.3 | China; 27.0, and Nepal; 21.0 |                    | Cross-sectional study | eMDRD 175     | Moderate               |
| Sharma et al.* [85]             | 2013 | Nepal                     | Age ≥20 years                                                                       | 1,000                                        | -                                      | 38.6                                      | 7.5                          | -                  | Cross-sectional study | MDRD 186      | Moderate               |
| Shen et al. *, † [86]           | 2019 | China                     | Age ≥18 years                                                                       | 1,627                                        | 37                                     | -                                         | -                            | -                  | Cross-sectional study | eMDRD 175     | High                   |
| Shi et al. * [87]               | 2019 | China                     | Age >18 years                                                                       | 8,429                                        | 47.2                                   | 25.8                                      | 10.2                         | -                  | Cohort study          | CKD-EPI       | High                   |
| Shi et al. *, † [88]            | 2020 | China                     | Age ≥35 years                                                                       | 11,694                                       | 46.3                                   | 50.1                                      | 10.4                         |                    | Cross-sectional study | CKD-EPI       | Moderate               |
| Singh et al. *, † [89]          | 2009 | India                     | Age ≥20 years                                                                       | 5,252                                        | 60                                     | 43.1                                      | 18.8                         | -                  | Cross-sectional study | MDRD 186      | High                   |
| Singh et al. *, † [90]          | 2013 | India                     | Age >18 years                                                                       | 5,588                                        | 55.1                                   | 37.3                                      | 10.4                         | NSAIDs 9.3         | Cross-sectional study | eMDRD 175     | Moderate               |
| Song et al.* [91]               | 2019 | China                     | Age ≥40 years                                                                       | 3,279                                        | 37.3                                   | 60.6                                      | -                            | -                  | Cross-sectional study | CKD-EPI       | High                   |
| Sun et al. *, † [92]            | 2017 | China                     | Age range of 21–94 years with type 2 Diabetes mellitus                              | 1,401                                        | 57.2                                   | 74.2                                      | 100.0                        | -                  | Cross-sectional study | CKD-EPI       | High                   |
| Tatapudi et al. *, † [93]       | 2019 | India                     | Age >18 years                                                                       | 2,210                                        | 44.3                                   | 16.7                                      | 7.2                          |                    | Cross-sectional study | N/A           | High                   |
| Trivedi et al.* [94]            | 2016 | India                     | Age ≥18 years                                                                       | 2,350                                        | 38.8                                   | 26.8                                      | 9.8                          | -                  | Cross-sectional study | MDRD 186      | Moderate               |
| Varma et al.* [95]              | 2010 | India                     | Age ≥18 years                                                                       | 2,595                                        | 66                                     | 13.2                                      | 1.5                          | -                  | Cross-sectional study | CKD-EPI       | Moderate               |
| Varma et al.* [96]              | 2010 | India                     | Age >20 years, all healthy adults                                                   | 1,920                                        | N/A                                    | 8.5                                       | 1.1                          | -                  | Cross-sectional study | MDRD 186      | Moderate               |
| Wang et al. *, † [97]           | 2015 | China                     | Age ≥45 years                                                                       | 8,659                                        | 47.6                                   | 63.8                                      | 26.4                         | -                  | Cross-sectional study | CKD-EPI       | High                   |

| Author                   | Year | Country  | Targeted-population                                | Number of participants | Male (%) | HT (%) | DM (%) | Medication use (%) | Study design          | eGFR equation | Newcastle-Ottawa Scale |
|--------------------------|------|----------|----------------------------------------------------|------------------------|----------|--------|--------|--------------------|-----------------------|---------------|------------------------|
| Wang et al. *, † [98]    | 2015 | China    | Age range of 40-60 years                           | 2,379                  | 51.9     | 22.1   | 2.8    | -                  | Cohort study          | CKD-EPI       | High                   |
| Wang et al. *, † [99]    | 2018 | China    | Age >20 years                                      | 46,949                 | 50       | 30.4   | 5.0    | -                  | Cross-sectional study | CKD-EPI       | High                   |
| Wen et al. *, † [100]    | 2017 | China    | Age >18 years                                      | 48,054                 | 57.9     | 8.9    | 2.2    | -                  | Cross-sectional study | CKD-EPI       | Moderate               |
| Xu et al. *, † [101]     | 2020 | China    | Age range of 45-59 years                           | 2,004                  | 50.0     | 14.3   | 10.6   | -                  | Cross-sectional study | CKD-EPI       | High                   |
| Yang et al.* [102]       | 2015 | China    | Age ≥ 40 years with obese                          | 1,115                  | 31.3     | -      | -      | -                  | Cross-sectional study | eMDRD 175     | High                   |
| Yang et al.* † [103]     | 2019 | China    | Age range of 27-95 years                           | 4,221                  | 40.6     | -      | -      | -                  | Cross-sectional study | CKD-EPI       | High                   |
| Yang et al.* † [104]     | 2019 | China    | Age range of 60-92 years                           | 4,242                  | 63.6     | -      | -      | -                  | Cross-sectional study | CKD-EPI       | High                   |
| Yang et al. *, † [105]   | 2021 | China    | Age range of 20-74 years                           | 36,077                 | 40.5     | 57.4   | 14.1   | -                  | Cross-sectional study | eMDRD 175     | High                   |
| Yuzbashian et al.* [106] | 2016 | Iran     | Age >27 years                                      | 2,382                  | 46       | 26.0   | 6.3    | -                  | Cross-sectional study | MDRD 186      | High                   |
| Zaman et al.* † [107]    | 2018 | Thailand | Age ≥18 years, type 2 diabetes patients            | 3,748                  | 35.3     | 55.2   | 100.0  | -                  | Cross-sectional study | eMDRD 175     | High                   |
| Zhang et al.* † [108]    | 2019 | China    | Age range of 18-79 years, type 2 diabetes patients | 1,025                  | 74       | 47.4   | 100.0  | -                  | Cross-sectional study | MDRD 186      | High                   |
| Zhang et al.* † [109]    | 2020 | China    | Age >18 years                                      | 11,280                 | 58.4     | 26.0   | -      | -                  | Cohort study          | eMDRD 175     | Moderate               |
| Zhang et al.* † [110]    | 2020 | China    | Age >18 years, diabetes patients                   | 361                    | 63.7     | 58.7   | 100.0  | -                  | Cross-sectional study | CKD-EPI       | High                   |

\* Studies included in pooled estimation of CKD prevalence in LMICs in Asia

† Studies included in pooled estimation of CKD associated risk factors in LMICs in Asia

**Table S4.** Newcastle-Ottawa quality assessment scale (NOS) of included studies in the Systematic Review: A cross-sectional studies.

| Author, Year                   | Selection                           |               |                   |                                               | Comparability                                                                                                               | Outcome                 |                    | Total Score | Quality assessment level |
|--------------------------------|-------------------------------------|---------------|-------------------|-----------------------------------------------|-----------------------------------------------------------------------------------------------------------------------------|-------------------------|--------------------|-------------|--------------------------|
|                                | 1. Representativeness of the sample | 2.Sample size | 3.Non-respondents | 4.Ascertainment of the exposure (risk factor) | 1.Comparability of subjects in different outcome groups on the basis of design or analysis. Confounding factors controlled. | 1.Assessment of outcome | 2.Statistical test |             |                          |
| Aekplakorn et al., 2021 [1]    | *                                   |               | *                 | *                                             | **                                                                                                                          | **                      | *                  | 8           | High                     |
| Alam et al., 2014 [2]          | *                                   |               | *                 | *                                             | **                                                                                                                          | **                      | *                  | 8           | High                     |
| Anand et al., 2014 [3]         | *                                   |               | *                 | *                                             | **                                                                                                                          | **                      |                    | 7           | High                     |
| Anand et al., 2017 [4]         | *                                   |               | *                 | **                                            | **                                                                                                                          | **                      | *                  | 9           | High                     |
| Anupama et al., 2014 [5]       | *                                   |               |                   | *                                             | **                                                                                                                          | **                      | *                  | 7           | High                     |
| Anupama et al., 2017 [6]       |                                     | *             |                   | *                                             | **                                                                                                                          | **                      | *                  | 7           | High                     |
| Bahadoran et al., 2016 [7]     |                                     |               | *                 | *                                             | **                                                                                                                          | **                      | *                  | 7           | High                     |
| Bragg-Gresham et al., 2020 [8] | *                                   |               | *                 | **                                            | **                                                                                                                          | **                      | *                  | 9           | High                     |
| Cao et al., 2013 [9]           |                                     |               | *                 | **                                            | **                                                                                                                          | **                      | *                  | 8           | High                     |
| Chen et al., 2008 [10]         | *                                   |               | *                 | *                                             | **                                                                                                                          | **                      | *                  | 8           | High                     |
| Chen et al., 2011 [11]         | *                                   |               | *                 | *                                             | **                                                                                                                          | **                      | *                  | 8           | High                     |
| Das et al., 2019 [12]          |                                     |               |                   | **                                            | **                                                                                                                          | **                      | *                  | 7           | High                     |
| Dhimal et al., 2019 [13]       | *                                   | *             | *                 | *                                             |                                                                                                                             | **                      |                    | 6           | Moderate                 |
| Du et al., 2017 [16]           |                                     |               | *                 | *                                             |                                                                                                                             | **                      | *                  | 5           | Moderate                 |
| Duan et al.,2019 [17]          | *                                   |               | *                 | *                                             | **                                                                                                                          | **                      | *                  | 8           | High                     |
| Fan et al., 2013 [18]          | *                                   |               | *                 | **                                            | **                                                                                                                          | **                      | *                  | 9           | High                     |
| Farag et al., 2020 [19]        | *                                   |               |                   | **                                            | **                                                                                                                          | **                      | *                  | 8           | High                     |
| Farhadnejad et al., 2019 [20]  | *                                   |               |                   | *                                             | **                                                                                                                          | **                      | *                  | 7           | High                     |
| Fatema et al., 2013 [21]       |                                     |               |                   | *                                             | **                                                                                                                          | **                      | *                  | 6           | Moderate                 |
| Feng et al., 2019 [22]         | *                                   |               |                   | *                                             | **                                                                                                                          | **                      | *                  | 7           | High                     |
| Gallieni et al., 2013 [23]     |                                     |               |                   | **                                            | **                                                                                                                          | **                      | *                  | 7           | High                     |
| Guo et al., 2017 [24]          |                                     |               | *                 | **                                            |                                                                                                                             | **                      | *                  | 6           | Moderate                 |
| Han et al., 2019 [25]          | *                                   |               |                   | *                                             |                                                                                                                             | **                      | *                  | 5           | Moderate                 |
| Hasan et al., 2012 [26]        |                                     | *             |                   | *                                             |                                                                                                                             | **                      |                    | 4           | Moderate                 |
| He et al., 2015 [27]           |                                     |               | *                 | *                                             | **                                                                                                                          | **                      | *                  | 7           | High                     |
| Herath et al., 2019 [28]       |                                     |               |                   | *                                             | **                                                                                                                          | **                      |                    | 5           | Moderate                 |

| Author, Year                   | Selection                           |               |                   |                                               | Comparability<br>1.Comparability of subjects in different outcome groups on the basis of design or analysis. Confounding factors controlled. | Outcome                 |                    | Total Score | Quality assessment level |
|--------------------------------|-------------------------------------|---------------|-------------------|-----------------------------------------------|----------------------------------------------------------------------------------------------------------------------------------------------|-------------------------|--------------------|-------------|--------------------------|
|                                | 1. Representativeness of the sample | 2.Sample size | 3.Non-respondents | 4.Ascertainment of the exposure (risk factor) |                                                                                                                                              | 1.Assessment of outcome | 2.Statistical test |             |                          |
| Hong et al., 2015 [29]         | *                                   |               | *                 | *                                             | **                                                                                                                                           | **                      | *                  | 8           | High                     |
| Hooi et al., 2013 [30]         | *                                   |               | *                 | *                                             |                                                                                                                                              | **                      | *                  | 6           | Moderate                 |
| Hosseinpanah et al., 2009 [31] | *                                   |               | *                 | **                                            | **                                                                                                                                           | **                      | *                  | 9           | High                     |
| Huda et al., 2012 [32]         | *                                   |               |                   | *                                             |                                                                                                                                              | **                      | *                  | 5           | Moderate                 |
| Hussain et al., 2019 [33]      | *                                   |               | *                 | *                                             | **                                                                                                                                           | **                      | *                  | 8           | High                     |
| Imran et al., 2015 [34]        |                                     |               |                   | *                                             |                                                                                                                                              | **                      | *                  | 4           | Moderate                 |
| Ingsathit et al., 2009 [35]    | *                                   | *             |                   | *                                             | **                                                                                                                                           | **                      | *                  | 8           | High                     |
| Ito et al., 2008 [36]          |                                     |               | *                 | **                                            | **                                                                                                                                           | **                      | *                  | 8           | High                     |
| Jafar et al., 2005 [37]        | *                                   |               | *                 | *                                             | **                                                                                                                                           | **                      | *                  | 8           | High                     |
| Jessani et al.,2014 [38]       | *                                   | *             | *                 | **                                            | **                                                                                                                                           | **                      | *                  | 10          | High                     |
| Ji et al., 2017 [39]           |                                     |               | *                 | *                                             | **                                                                                                                                           | **                      | *                  | 7           | High                     |
| Ji et al., 2019 [40]           | *                                   |               | *                 | *                                             | **                                                                                                                                           | **                      | *                  | 8           | High                     |
| Jiang et al., 2011 [41]        | *                                   |               | *                 | **                                            | **                                                                                                                                           | **                      | *                  | 9           | High                     |
| Kaewput et al., 2019 [42]      | *                                   |               |                   | *                                             | **                                                                                                                                           | **                      | *                  | 7           | High                     |
| Khajehdehi et al., 2014 [43]   | *                                   | *             |                   | *                                             |                                                                                                                                              | **                      | *                  | 6           | Moderate                 |
| Khanam et al., 2016 [44]       |                                     |               |                   | **                                            |                                                                                                                                              | **                      | *                  | 5           | Moderate                 |
| Kitiyakara et al., 2012 [45]   |                                     |               |                   | *                                             |                                                                                                                                              | **                      | *                  | 4           | Moderate                 |
| Kitiyakara et al., 2020 [46]   |                                     |               | *                 | *                                             | **                                                                                                                                           | **                      | *                  | 7           | High                     |
| Li et al., 2014 [48]           | *                                   |               | *                 | *                                             | **                                                                                                                                           | **                      | *                  | 8           | High                     |
| Li et al., 2021 [49]           | *                                   |               | *                 | *                                             | **                                                                                                                                           | **                      | *                  | 8           | High                     |
| Liang et al., 2021 [50]        | *                                   |               |                   |                                               | **                                                                                                                                           |                         | *                  | 4           | Moderate                 |
| Liu et al., 2013 [52]          |                                     |               | *                 | *                                             | **                                                                                                                                           | **                      | *                  | 7           | High                     |
| Liu et al., 2013 [54]          |                                     |               | *                 | **                                            | **                                                                                                                                           | **                      | *                  | 8           | High                     |
| Liu et al., 2016 [55]          |                                     |               |                   | *                                             | **                                                                                                                                           | **                      | *                  | 6           | Moderate                 |
| Lu et al., 2016 [56]           |                                     |               | *                 | *                                             | **                                                                                                                                           | *                       | *                  | 6           | Moderate                 |
| Luk et al., 2015 [57]          |                                     |               |                   | *                                             |                                                                                                                                              | **                      | *                  | 4           | Moderate                 |
| Lv et al., 2020 [58]           | *                                   |               |                   | *                                             | **                                                                                                                                           | **                      | *                  | 7           | High                     |
| Mahapatra et al., 2016 [59]    |                                     |               |                   | *                                             |                                                                                                                                              | **                      | *                  | 4           | Moderate                 |



| Author, Year                     | Selection                           |               |                   |                                               | Comparability                                                                                                               | Outcome                 |                    | Total Score | Quality assessment level |
|----------------------------------|-------------------------------------|---------------|-------------------|-----------------------------------------------|-----------------------------------------------------------------------------------------------------------------------------|-------------------------|--------------------|-------------|--------------------------|
|                                  | 1. Representativeness of the sample | 2.Sample size | 3.Non-respondents | 4.Ascertainment of the exposure (risk factor) | 1.Comparability of subjects in different outcome groups on the basis of design or analysis. Confounding factors controlled. | 1.Assessment of outcome | 2.Statistical test |             |                          |
| Mahdavi-Mazdeh et al., 2010 [60] |                                     |               |                   | *                                             | **                                                                                                                          | **                      | *                  | 6           | Moderate                 |
| Mohanty et al., 2020 [61]        | *                                   | *             |                   | **                                            |                                                                                                                             | **                      | *                  | 7           | High                     |
| Naghibi et al., 2015 [62]        | *                                   |               |                   | **                                            |                                                                                                                             | **                      |                    | 5           | Moderate                 |
| Najafi et al., 2010 [63]         |                                     |               |                   | *                                             | **                                                                                                                          | **                      | *                  | 6           | Moderate                 |
| Nampoothiri et al., 2019 [64]    | *                                   |               |                   | *                                             | **                                                                                                                          | **                      | *                  | 7           | High                     |
| Nand et al., 2015 [58]           |                                     |               |                   | **                                            |                                                                                                                             | **                      | *                  | 5           | Moderate                 |
| Naseem et al., 2017 [66]         |                                     |               | *                 | *                                             |                                                                                                                             | *                       | *                  | 4           | Moderate                 |
| Ong-ajyooth et al., 2009 [67]    | *                                   |               | *                 | *                                             | **                                                                                                                          | **                      | *                  | 8           | High                     |
| Pan et al., 2014 [68]            | *                                   |               |                   | *                                             | **                                                                                                                          | **                      | *                  | 7           | High                     |
| Pan et al., 2015 [69]            | *                                   |               | *                 | *                                             | **                                                                                                                          | **                      | *                  | 8           | High                     |
| Perkovic et al., 2007 [70]       | *                                   |               | *                 | *                                             |                                                                                                                             | **                      | *                  | 6           | Moderate                 |
| Prodjosudjadi et al., 2009 [72]  |                                     |               |                   | *                                             | **                                                                                                                          | **                      |                    | 5           | Moderate                 |
| Qiu et al., 2019 [73]            | *                                   |               |                   | *                                             | **                                                                                                                          | **                      | *                  | 7           | High                     |
| Rahim et al., 2017 [74]          |                                     |               |                   | **                                            |                                                                                                                             | **                      |                    | 4           | Moderate                 |
| Rai et al., 2019 [75]            |                                     | *             |                   | **                                            | **                                                                                                                          | **                      | *                  | 8           | High                     |
| Rai et al., 2019 [76]            |                                     |               |                   | *                                             | **                                                                                                                          | **                      | *                  | 6           | Moderate                 |
| Rajput et al., 2017 [77]         |                                     |               |                   | **                                            |                                                                                                                             | **                      |                    | 4           | Moderate                 |
| Ruwanpathirana et al., 2019 [78] | *                                   |               | *                 | *                                             | **                                                                                                                          | **                      | *                  | 8           | High                     |
| Saber et al., 2017 [79]          | *                                   | *             |                   | *                                             |                                                                                                                             | **                      |                    | 5           | Moderate                 |
| Sahin et al., 2009 [80]          | *                                   | *             |                   | **                                            |                                                                                                                             | **                      |                    | 6           | Moderate                 |
| Satirapoj et al., 2013 [81]      |                                     |               |                   | *                                             | **                                                                                                                          | **                      | *                  | 6           | Moderate                 |
| Shan et al., 2009 [83]           | *                                   |               | *                 | *                                             | **                                                                                                                          | **                      | *                  | 8           | High                     |
| Sharma et al., 2010 [84]         |                                     |               |                   | **                                            |                                                                                                                             | **                      |                    | 4           | Moderate                 |
| Sharma et al., 2013 [85]         |                                     |               | *                 | *                                             |                                                                                                                             | **                      | *                  | 5           | Moderate                 |
| Shen et al., 2019 [86]           | *                                   | *             | *                 | *                                             |                                                                                                                             | **                      | *                  | 7           | High                     |
| Shi et al., 2020 [88]            |                                     |               |                   | *                                             | **                                                                                                                          | **                      | *                  | 6           | Moderate                 |
| Singh et al., 2009 [89]          | *                                   |               | *                 | *                                             | **                                                                                                                          | **                      | *                  | 8           | High                     |
| Singh et al., 2013 [90]          |                                     |               |                   | *                                             |                                                                                                                             | **                      | *                  | 4           | Moderate                 |

| Author, Year                  | Selection                           |                |                    |                                                | Comparability                                                                                                                | Outcome                  |                     | Total Score | Quality assessment level |
|-------------------------------|-------------------------------------|----------------|--------------------|------------------------------------------------|------------------------------------------------------------------------------------------------------------------------------|--------------------------|---------------------|-------------|--------------------------|
|                               | 1. Representativeness of the sample | 2. Sample size | 3. Non-respondents | 4. Ascertainment of the exposure (risk factor) | 1. Comparability of subjects in different outcome groups on the basis of design or analysis. Confounding factors controlled. | 1. Assessment of outcome | 2. Statistical test |             |                          |
| Song et al., 2019 [91]        | *                                   |                |                    | *                                              | **                                                                                                                           | **                       | *                   | 7           | High                     |
| Sun et al., 2017 [92]         |                                     |                |                    | **                                             | **                                                                                                                           | **                       | *                   | 7           | High                     |
| Tatapudi et al., 2019 [93]    | *                                   | *              | *                  | *                                              | **                                                                                                                           | **                       | *                   | 9           | High                     |
| Trivedi et al., 2016 [94]     |                                     |                |                    | *                                              |                                                                                                                              | **                       | *                   | 4           | Moderate                 |
| Varma et al., 2010 [95]       |                                     |                |                    | *                                              |                                                                                                                              | **                       | *                   | 4           | Moderate                 |
| Varma et al., 2010 [96]       |                                     |                |                    | *                                              |                                                                                                                              | **                       | *                   | 4           | Moderate                 |
| Wang et al., 2015 [97]        | *                                   |                | *                  | **                                             | **                                                                                                                           | **                       | *                   | 9           | High                     |
| Wang et al., 2018 [99]        | *                                   | *              | *                  | *                                              | **                                                                                                                           | **                       | *                   | 9           | High                     |
| Wen et al., 2017 [100]        |                                     |                |                    | *                                              | **                                                                                                                           | **                       | *                   | 6           | Moderate                 |
| Xu et al., 2020 [101]         | *                                   |                | *                  | *                                              | **                                                                                                                           | **                       | *                   | 8           | High                     |
| Yang et al., 2015 [102]       | *                                   |                |                    | **                                             | **                                                                                                                           | **                       | *                   | 8           | High                     |
| Yang et al., 2019 [103]       | *                                   |                |                    | *                                              | **                                                                                                                           | **                       | *                   | 7           | High                     |
| Yang et al., 2019 [104]       | *                                   |                |                    | *                                              | **                                                                                                                           | **                       | *                   | 7           | High                     |
| Yang et al., 2021 [105]       | *                                   |                |                    | *                                              | **                                                                                                                           | **                       | *                   | 7           | High                     |
| Yuzbashian et al., 2015 [106] | *                                   |                |                    | *                                              | **                                                                                                                           | **                       | *                   | 7           | High                     |
| Zaman et al., 2018 [107]      | *                                   |                |                    | **                                             | **                                                                                                                           | **                       | *                   | 8           | High                     |
| Zhang et al., 2019 [108]      | *                                   |                |                    | **                                             | **                                                                                                                           | **                       | *                   | 8           | High                     |
| Zhang et al., 2020 [110]      | *                                   |                |                    | **                                             | **                                                                                                                           | **                       | *                   | 8           | High                     |

**Study quality Scoring:** High = 7-10 points, Moderate= 4-6 points, and Poor = 0-3 points

**Table S5.** Newcastle-Ottawa quality assessment scale (NOS) of included studies in the Systematic Review: A cohort studies

| Author, Year                        | Selection                                     |                                        |                              |                                                                             | Comparability                                                      | Outcome                  |                                                     |                                     | Total Score | Quality assessment level |
|-------------------------------------|-----------------------------------------------|----------------------------------------|------------------------------|-----------------------------------------------------------------------------|--------------------------------------------------------------------|--------------------------|-----------------------------------------------------|-------------------------------------|-------------|--------------------------|
|                                     | 1. Representative -ness of the exposed cohort | 2. Selection of the non-exposed cohort | 3. Ascertainment of exposure | 4. Demonstration that outcome of interest was not present at start of study | 1. Comparability of cohorts on the basis of the design or analysis | 1. Assessment of outcome | 2. Was follow-up long enough for outcomes to occur? | 3. Adequacy of follow up of cohorts |             |                          |
| Ding et al., 2012 [14]              |                                               |                                        | *                            | *                                                                           |                                                                    | *                        | *                                                   | *                                   | 5           | Moderate                 |
| Domrongkitchaiporn et al, 2004 [15] |                                               |                                        | *                            | *                                                                           | *                                                                  | *                        | *                                                   | *                                   | 6           | Moderate                 |
| Le et al., 2020 [47]                | *                                             | *                                      | *                            |                                                                             |                                                                    | *                        | *                                                   |                                     | 5           | Moderate                 |
| Lin et al., 2017 [51]               | *                                             | *                                      | *                            | *                                                                           | **                                                                 | *                        | *                                                   | *                                   | 9           | High                     |
| Liu et al., 2020 [53]               |                                               | *                                      | *                            | *                                                                           | *                                                                  |                          | *                                                   | *                                   | 6           | Moderate                 |
| Pongpirul et al., 2017 [71]         |                                               |                                        | *                            | *                                                                           | *                                                                  | *                        | *                                                   |                                     | 5           | Moderate                 |
| Sepanlou et al., 2017 [82]          | *                                             | *                                      |                              |                                                                             | **                                                                 | *                        | *                                                   |                                     | 5           | Moderate                 |
| Shi et al., 2019 [87]               | *                                             | *                                      | *                            |                                                                             | **                                                                 |                          | *                                                   | *                                   | 7           | High                     |
| Wang et al., 2015 [98]              | *                                             | *                                      | *                            | *                                                                           | *                                                                  | *                        | *                                                   | *                                   | 8           | High                     |
| Zhang et al., 2020 [109]            |                                               |                                        | *                            | *                                                                           | *                                                                  | *                        |                                                     | *                                   | 5           | Moderate                 |

**Study quality Scoring:** High = 7-9 points, Moderate= 4-6 points, and Poor = 0-3 points

## References to included studies and Newcastle-Ottawa quality assessment scale (NOS).

1. Aekplakorn W, Chariyalertsak S, Kessomboon P, Assanangkornchai S, Taneepanichskul S, Neelapaichit N, et al. Women and other risk factors for chronic kidney disease of unknown etiology in Thailand: National Health Examination V Survey. *Scientific reports*. 2021;11(1). doi: 10.1038/s41598-021-00694-9.
2. Alam A, Amanullah F, Baig-Ansari N, Lotia-Farrukh I, Khan FS. Prevalence and risk factors of kidney disease in urban Karachi: Baseline findings from a community cohort study. *BMC Res Notes*. 2014;7(1). doi: 10.1186/1756-0500-7-179. PubMed Central PMCID: PMC24670059.
3. Anand S, Khanam MA, Saquib J, Saquib N, Ahmed T, Alam DS, et al. High prevalence of chronic kidney disease in a community survey of urban Bangladeshis: A cross-sectional study. *Globalization Health*. 2014;10(1). doi: 10.1186/1744-8603-10-9. PubMed Central PMCID: PMC24555767.
4. Anand S, Kondal D, Montez-Rath M, Zheng Y, Shivashankar R, Singh K, et al. Prevalence of chronic kidney disease and risk factors for its progression: A cross-sectional comparison of Indians living in Indian versus U.S. cities. *PLoS ONE*. 2017;12(3). doi: 10.1371/journal.pone.0173554. PubMed Central PMCID: PMC28296920.
5. Anupama Y, Uma G. Prevalence of chronic kidney disease among adults in a rural community in South India: Results from the kidney disease screening (KIDS) project. *Indian journal of nephrology*. 2014;24(4):214.
6. Anupama YJ, Hegde SN, Uma G, Patil M. Hypertension is an important risk determinant for chronic kidney disease: results from a cross-sectional, observational study from a rural population in South India. *Journal of human hypertension*. 2017;31(5):327-32. Epub 2016/11/25. doi: 10.1038/jhh.2016.81. PubMed PMID: 27882930.
7. Bahadoran Z, Mirmiran P, Tahmasebi Nejad Z, Ghasemi A, Azizi F. Serum nitric oxide is associated with the risk of chronic kidney disease in women: Tehran lipid and glucose study. *Scandinavian journal of clinical and laboratory investigation*. 2016;76(4):304-8. Epub 2016/03/10. doi: 10.3109/00365513.2016.1149880. PubMed PMID: 26956540.
8. Bragg-Gresham J, Thakur JS, Jeet G, Jain S, Pal A, Prasad R, et al. Population-based comparison of chronic kidney disease prevalence and risk factors among adults living in the Punjab, Northern India and the USA (2013-2015). *BMJ open*. 2020;10(12):e040444. Epub 2020/12/16. doi: 10.1136/bmjopen-2020-040444. PubMed PMID: 33318117; PubMed Central PMCID: PMC7737106.
9. Cao Y, Gong M, Han Y, Xie J, Li X, Zhang L, et al. Prevalence and risk factors for chronic kidney disease among HIV-infected antiretroviral therapy-naïve patients in Mainland China: A multicenter cross-sectional study. *Nephrology*. 2013;18(4):307-12. doi: 10.1111/nep.12031. PubMed Central PMCID: PMC23311442.
10. Chen W, Chen W, Wang H, Dong X, Liu Q, Mao H, et al. Prevalence and risk factors associated with chronic kidney disease in an adult population from southern China. *Nephrology Dialysis Transplantation*. 2009;24(4):1205-12.
11. Chen W, Liu Q, Wang H, Chen W, Johnson RJ, Dong X, et al. Prevalence and risk factors of chronic kidney disease: a population study in the Tibetan population. *Nephrology, dialysis, transplantation*. 2011;26(5):1592-9. doi: 10.1093/ndt/gfq608. PubMed PMID: CN-00802521.

12. Das SK, Afsana SM, Elahi SB, Chisti MJ, Das J, Mamun AA, et al. Renal insufficiency among urban populations in Bangladesh: A decade of laboratory-based observations. 2019;14(4):e0214568.
13. Dhimal M, Karki KB, Sharma SK, Aryal KK, Shrestha N, Poudyal A, et al. Prevalence of Selected Chronic Non-Communicable Diseases in Nepal. *J Nepal Health Res Council.* 2019;17(3):394-401. Epub 2019/11/19. doi: 10.33314/jnhrc.v17i3.2327. PubMed PMID: 31735938.
14. Ding Z, Wang X, Chen Z, Zhang X, Tang C, Feng Y, et al. Chronic kidney disease predicts poor prognosis in patients with stable premature coronary artery disease. *Eur J Intern Med.* 2012;23(8):716-9. doi: 10.1016/j.ejim.2012.07.003. PubMed Central PMCID: PMC22857882.
15. Domrongkitchaiporn S, Sritara P, Kitiyakara C, Stitchantrakul W, Krittaphol V, Lolekha P, et al. Risk factors for development of decreased kidney function in a Southeast Asian population: A 12-year cohort study. *J Am Soc Nephrol.* 2005;16(3):791-9. doi: 10.1681/ASN.2004030208. PubMed Central PMCID: PMC15677313.
16. Du Y, Zhang S, Hu M, Wang Q, Shen H, Zhang Y, et al. Prevalence of chronic kidney disease markers: Evidence from a three-million married population with fertility desire in rural China. *Sci Rep.* 2017;7(1). doi: 10.1038/s41598-017-02355-2. PubMed Central PMCID: PMC28578426.
17. Duan J, Wang C, Liu D, Qiao Y, Pan S, Jiang D, et al. Prevalence and risk factors of chronic kidney disease and diabetic kidney disease in Chinese rural residents: a cross-sectional survey. *Sci Rep.* 2019;9(1):10408. doi: 10.1038/s41598-019-46857-7.
18. Fan KL, Zhang HF, Zhu ZY, Yao WM, Shen J, Liang NX, et al. Association of CYBA rs7195830 polymorphism with estimated glomerular filtration rate in an adult Han sample from Jiangsu province, China. *Chin Med J.* 2013;126(17):3311-5. doi: 10.3760/cma.j.issn.0366-6999.20123332. PubMed Central PMCID: PMC24033955.
19. Farag YM, Karai Subramanian K, Singh VA, Tatapudi RR, Singh AKJRF. Occupational risk factors for chronic kidney disease in Andhra Pradesh: 'Uddanam Nephropathy'. 2020;42(1):1032-41.
20. Farhadnejad H, Asghari G, Emamat H, Mirmiran P, Azizi F. Low-Carbohydrate High-Protein Diet is Associated With Increased Risk of Incident Chronic Kidney Diseases Among Tehranian Adults. *J Ren Nutr.* 2019;29(4):343-9. Epub 2018/12/24. doi: 10.1053/j.jrn.2018.10.007. PubMed PMID: 30579675.
21. Fatema K, Abedin Z, Mansur A, Rahman F, Khatun T, Sumi N, et al. Screening for chronic kidney diseases among an adult population. *Saudi Journal of Kidney Diseases and Transplantation.* 2013;24(3):534.
22. Feng L, De Silva HA, Jehan I, Naheed A, Kasturiratne A, Himani G, et al. Regional variation in chronic kidney disease and associated factors in hypertensive individuals in rural South Asia: Findings from control of blood pressure and risk attenuation - Bangladesh, Pakistan and Sri Lanka. *Nephrology Dialysis Transplantation.* 2019;34(10):1723-30. doi: 10.1093/ndt/gfy184.
23. Gallieni M, Ene-Iordache B, Aiello A, Tucci B, Sala V, Brahmochary Mandal SK, et al. Hypertension and kidney function in an adult population of West Bengal, India: Role of body weight, waist circumference, proteinuria and rural area living. *Nephrology.* 2013;18(12):798-807. doi: 10.1111/nep.12142. PubMed Central PMCID: PMC23889782.
24. Guo M, Niu JY, Ye XW, Han XJ, Zha Y, Hong Y, et al. Evaluation of various equations for estimating renal function in elderly Chinese patients with type 2 diabetes

- mellitus. *Clin Interventions Aging*. 2017;12:1661-72. doi: 10.2147/CIA.S140289. PubMed Central PMCID: PMC29070944.
25. Han QX, Zhang D, Zhao YL, Liu L, Li J, Zhang F, et al. Analysis of chronic kidney disease staging with different estimated glomerular filtration rate equations in Chinese centenarians. *Chin Med J*. 2019;132(5):512-8. doi: 10.1097/CM9.000000000000079.
  26. Hasan MJ, Kashem MA, Rahman MH, Qudduhush R, Rahman M, Sharmeen A, et al. Prevalence of chronic kidney disease (CKD) and identification of associated risk factors among rural population by mass screening. 2012;1(1):20-6.
  27. He Y, Li F, Wang F, Ma X, Zhao X, Zeng Q. The association of chronic kidney disease and waist circumference and waist-to-height ratio in Chinese urban adults. *Medicine*. 2016;95(25):e3769. Epub 2016/06/24. doi: 10.1097/md.0000000000003769. PubMed PMID: 27336864; PubMed Central PMCID: PMC4998302 publication elsewhere; and that it has been submitted with the full knowledge and approval of the institution or organization given as the affiliation of the author(s). The authors have no conflicts of interest.
  28. Herath N, Dassanayake R, Dissanayake M, Janitha C, Weerakoon K, Kumarasinghe C, et al. Normality data of eGFR and validity of commonly used screening tests for CKD in an area with endemic CKD of unknown etiology; need for age and sex based precise cutoff values. *BMC Nephrol*. 2019;20(1):298. Epub 2019/08/07. doi: 10.1186/s12882-019-1477-9. PubMed PMID: 31382902; PubMed Central PMCID: PMC6683421.
  29. Hong D, Zhang Y, Gao B, Wang J, Li G, Wang L, et al. Metabolic syndrome without diabetes or hypertension still necessitates early screening for chronic kidney disease: Information from a Chinese national cross-sectional study. *PLoS ONE*. 2015;10(7). doi: 10.1371/journal.pone.0132220. PubMed Central PMCID: PMC26161991.
  30. Hooi LS, Ong LM, Ahmad G, Bavanandan S, Ahmad NA, Naidu BM, et al. A population-based study measuring the prevalence of chronic kidney disease among adults in West Malaysia. *Kidney international*. 2013;84(5):1034-40.
  31. Hosseinpanah F, Kasraei F, Nassiri AA, Azizi F. High prevalence of chronic kidney disease in Iran: a large population-based study. *BMC public Health*. 2009;9(1):1-8.
  32. Huda MN, Alam KS. Prevalence of chronic kidney disease and its association with risk factors in disadvantaged population. *International journal of nephrology*. 2012;2012.
  33. Hussain S, Habib A, Najmi AK. Limited knowledge of chronic kidney disease among type 2 diabetes mellitus patients in india. *International Journal of Environmental Research and Public Health*. 2019;16(8). doi: 10.3390/ijerph16081443.
  34. Imran S, Shiekh A, Saeed Z, Khan SA, Malik AO, Patel J. Burden of chronic kidney disease in an urban city of Pakistan, a cross-sectional study. *J Pak Med Assoc*. 2015;65(4):366-9.
  35. Ingsathit A, Thakkinstian A, Chaiprasert A, Sangthawan P, Gojaseni P, Kiattisunthorn K, et al. Prevalence and risk factors of chronic kidney disease in the Thai adult population: Thai SEEK study. *Nephrology, dialysis, transplantation : official publication of the European Dialysis and Transplant Association - European Renal Association*. 2010;25(5):1567-75. Epub 2009/12/29. doi: 10.1093/ndt/gfp669. PubMed PMID: 20037182.
  36. Ito J, Dung DTK, Vuong MT, Tuyen DG, Vinh LD, Huong NT, et al. Impact and perspective on chronic kidney disease in an Asian developing country: A large-scale survey in north Vietnam. *Nephron Clin Pract*. 2008;109(1):c25-c32. doi: 10.1159/000134379. PubMed Central PMCID: PMC18497502.
  37. Jafar TH, Schmid CH, Levey AS. Serum creatinine as marker of kidney function in South Asians: A study of reduced GFR in adults in Pakistan. *J Am Soc Nephrol*. 2005;16(5):1413-9. doi: 10.1681/ASN.2004121100.

38. Jessani S, Bux R, Jafar TH. Prevalence, determinants, and management of chronic kidney disease in Karachi, Pakistan - A community based cross-sectional study. *BMC Nephrol.* 2014;15(1). doi: 10.1186/1471-2369-15-90. PubMed Central PMCID: PMC24927636.
39. Ji H, Zhang H, Xiong J, Yu S, Chi C, Bai B, et al. eGFRs from Asian-modified CKD-EPI and Chinese-modified CKD-EPI equations were associated better with hypertensive target organ damage in the community-dwelling elderly Chinese: The Northern Shanghai study. *Clin Interventions Aging.* 2017;12:1297-308. doi: 10.2147/CIA.S141102. PubMed Central PMCID: PMC28860731.
40. Ji A, Pan C, Wang H, Jin Z, Lee JH, Wu Q, et al. Prevalence and Associated Risk Factors of Chronic Kidney Disease in an Elderly Population from Eastern China. *Int J Environ Res Public Health.* 2019;16(22). Epub 2019/11/14. doi: 10.3390/ijerph16224383. PubMed PMID: 31717585; PubMed Central PMCID: PMC6888049.
41. Jiang L, Liang Y, Qiu B, Wang F, Duan X, Yang X, et al. Metabolic syndrome and chronic kidney disease in a rural Chinese population. *Clin Chim Acta.* 2011;412(21-22):1983-8. doi: 10.1016/j.cca.2011.07.014. PubMed Central PMCID: PMC21801716.
42. Kaewput W, Thongprayoon C, Rangsri R, Ruangkananasetr P, Bathini T, Mao MA, et al. Association between serum uric acid and chronic kidney disease in patients with hypertension: A multicenter nationwide cross-sectional study. *J Evid Based Med.* 2019;12(4):235-42. Epub 2019/09/05. doi: 10.1111/jebm.12364. PubMed PMID: 31482688.
43. Khajehdehi P, Malekmakan L, Pakfetrat M, Roozbeh J, Sayadi M. Prevalence of Chronic Kidney Disease and Its Contributing Risk Factors in Southern Iran A Cross-sectional Adult Population-based Study. 2014.
44. Khanam P, Sayeed M, Islam A, Begum T, Habib S, Nahar N, et al. Hospital-based prevalence of chronic kidney disease among the newly registered patients with diabetes. 2016;7(3):2.
45. Kitiyakara C, Yamwong S, Vathesatogkit P, Chittamma A, Cheepudomwit S, Vanavanan S, et al. The impact of different GFR estimating equations on the prevalence of CKD and risk groups in a Southeast Asian cohort using the new KDIGO guidelines. *BMC Nephrol.* 2012;13(1). doi: 10.1186/1471-2369-13-1. PubMed Central PMCID: PMC22226403.
46. Kitiyakara C, Saranburut K, Thongmung N, Chittamma A, Vanavanan S, Donsakul K, et al. Long-term effects of socioeconomic status on the incidence of decreased glomerular filtration rate in a Southeast Asian cohort. *Journal of Epidemiology and Community Health.* 2020;74(11):925-32. doi: 10.1136/jech-2019-212718.
47. Le HT, Le TT, Tran NMT, Nguyen TTT, Minh NCS, Le QT, et al. Decreased glomerular filtration rate in patients with at least 5 years of type 2 diabetes in Ho Chi Minh City, Vietnam: Prevalence and associated factors. *Primary Care Diabetes.* 2020;14(2):173-80. doi: <https://doi.org/10.1016/j.pcd.2019.08.003>.
48. Li Y, Chen Y, Liu X, Liang Y, Shao X, Zhang Y, et al. Metabolic syndrome and chronic kidney disease in a Southern Chinese population. *Nephrology.* 2014;19(6):325-31. doi: 10.1111/nep.12219. PubMed Central PMCID: PMC24548104.
49. Li G, Huang J, Wang J, Zhao M, Liu Y, Guo X, et al. Long-Term Exposure to Ambient PM(2.5) and Increased Risk of CKD Prevalence in China. *Journal of the American Society of Nephrology : JASN.* 2021;32(2):448-58. Epub 2020/12/19. doi: 10.1681/asn.2020040517. PubMed PMID: 33334736; PubMed Central PMCID: PMC68054885.

50. Liang Z, Wang W, Wang Y, Ma L, Liang C, Li P, et al. Urbanization, ambient air pollution, and prevalence of chronic kidney disease: A nationwide cross-sectional study. *Environment international*. 2021;156:106752. Epub 2021/07/14. doi: 10.1016/j.envint.2021.106752. PubMed PMID: 34256301.
51. Lin L, Lu J, Chen L, Mu Y, Ye Z, Liu C, et al. Glycemic status and chronic kidney disease in Chinese adults: Findings from the REACTION study. *Journal of diabetes*. 2017;9(9):837-45. Epub 2016/10/14. doi: 10.1111/1753-0407.12490. PubMed PMID: 27734593.
52. Liu K, Liu Q, Chen W, Liang M, Luo W, Wu X, et al. Prevalence and Risk Factors of CKD in Chinese Patients with Periodontal Disease. *PLoS ONE*. 2013;8(8). doi: 10.1371/journal.pone.0070767. PubMed Central PMCID: PMC23951003.
53. Liu Y, Yuan Y, Xiao Y, Li Y, Yu Y, Mo T, et al. Associations of plasma metal concentrations with the decline in kidney function: A longitudinal study of Chinese adults. *Ecotoxicology and environmental safety*. 2020;189:110006. doi: 10.1016/j.ecoenv.2019.110006.
54. Liu H, Zhou C, Yu J, Jiang Q, Hu D. Reduced kidney function in acute coronary syndrome patients with undiagnosed diabetes or pre-diabetes. *Nephrology*. 2013;18(4):263-8. doi: 10.1111/nep.12033. PubMed Central PMCID: PMC23332008.
55. Liu J, Chen Z, Li W, Xu G, Llu J, Yt B, et al. Obesity indices for prediction of chronic kidney disease: A cross-sectional study in 26 655 Chinese adults. *J Cent South Univ Med Sci*. 2016;41(5):445-54. doi: 10.11817/j.issn.1672-7347.2016.05.001. PubMed Central PMCID: PMC27269917.
56. Lu J, Mu Y, Su Q, Shi L, Liu C, Zhao J, et al. Reduced Kidney Function Is Associated With Cardiometabolic Risk Factors, Prevalent and Predicted Risk of Cardiovascular Disease in Chinese Adults: Results From the REACTION Study. *J Am Heart Assoc*. 2016;5(7). doi: 10.1161/JAHA.116.003328. PubMed Central PMCID: PMC27451464.
57. Luk AO, Li X, Zhang Y, Guo X, Jia W, Li W, et al. Quality of care in patients with diabetic kidney disease in Asia: The Joint Asia Diabetes Evaluation (JADE) Registry. *Diabet Med*. 2016;33(9):1230-9. doi: 10.1111/dme.13014. PubMed Central PMCID: PMC26511783.
58. Lv S, Shen Z, Zhang H, Yu X, Chen J, Gu Y, et al. Association between exposure to the Chinese famine during early life and the risk of chronic kidney disease in adulthood. *Environ Res*. 2020;184:109312. Epub 2020/03/11. doi: 10.1016/j.envres.2020.109312. PubMed PMID: 32151839.
59. Mahapatra HS, Gupta YP, Sharma N, Buxi G. Identification of high-risk population and prevalence of kidney damage among asymptomatic central government employees in Delhi, India. *Saudi Journal of Kidney Diseases and Transplantation*. 2016;27(2):362.
60. Mahdavi-Mazdeh M, Saeed Hashemi Nazri S, Hajghasemi E, Nozari B, Zinat Nadia H, Mahdavi A. Screening for decreased renal function in taxi drivers in Tehran, Iran. *Renal failure*. 2010;32(1):62-8.
61. Mohanty NK, Sahoo KC, Pati S, Sahu AK, Mohanty R. Prevalence of Chronic Kidney Disease in Cuttack District of Odisha, India. *Int J Environ Res Public Health*. 2020;17(2). Epub 2020/01/16. doi: 10.3390/ijerph17020456. PubMed PMID: 31936746; PubMed Central PMCID: PMC7014305.
62. Naghbi M, Mojahedi MJ, Jarrahi L, Emadzadeh A, Ahmadi R, Emadzadeh M, et al. Prevalence of chronic kidney disease and its risk factors in Gonabad, Iran. *Iranian Journal of Kidney Diseases*. 2015;9(6):449.
63. Najafi I, Attari F, Islami F, Shakeri R, Malekzadeh F, Salahi R, et al. Renal function and risk factors of moderate to severe chronic kidney disease in Golestan Province, northeast of Iran. *PLoS ONE*. 2010;5(12):e14216.



64. Nampoothiri RV, Duseja A, Rathi M, Agrawal S, Sachdeva N, Mehta M, et al. Renal Dysfunction in Patients With Nonalcoholic Fatty Liver Disease is Related to the Presence of Diabetes Mellitus and Severity of Liver Disease. *Journal of Clinical and Experimental Hepatology*. 2019;9(1):22-8. doi: <https://doi.org/10.1016/j.jceh.2017.12.005>.
65. Nand N, Sharma M, Anand L, Shankar V, Kumar H. Evaluation of renal functions in patients having metabolic syndrome in Asian Indian cohort. *J Indian Acad Clin Med*. 2015;16(1):33-8.
66. Naseem R, Adam AM, Khan F, Dossal A, Khan I, Khan A, et al. Prevalence and characteristics of resistant hypertensive patients in an Asian population. *Indian Heart Journal*. 2017;69(4):442-6. doi: <https://doi.org/10.1016/j.ihj.2017.01.012>.
67. Ong-ajyooth L, Vareesangthip K, Khonputsa P, Aekplakorn W. Prevalence of chronic kidney disease in Thai adults: a national health survey. *BioMed Central Ltd [Internet]*. 2009. Available from: Item Resolution URL <http://www.biomedcentral.com/1471-2369/10/35>.
68. Pan Y, Zhang L, Wang F, Li X, Wang H, Group CNSoCKDW. Status of non-steroidal anti-inflammatory drugs use and its association with chronic kidney disease: A cross-sectional survey in C hina. *Nephrology*. 2014;19(10):655-60.
69. Pan L, Ma R, Wu Y, Feng L, Song Ys, Ye Xd, et al. Prevalence and risk factors associated with chronic kidney disease in a Z huang ethnic minority area in C hina. *Nephrology*. 2015;20(11):807-13.
70. Perkovic V, Cass A, Patel AA, Suriyawongpaisal P, Barzi F, Chadban S, et al. High prevalence of chronic kidney disease in Thailand. *Kidney Int*. 2008;73(4):473-9. Epub 2007/12/07. doi: 10.1038/sj.ki.5002701. PubMed PMID: 18059458.
71. Pongpirul W, Pongpirul K, Ananworanich J, Klinbuayaem V, Avihingsanon A, Prasithsirikul W. Chronic kidney disease incidence and survival of Thai HIV-infected patients. *AIDS*. 2018;32(3):393-8. doi: 10.1097/QAD.0000000000001698.
72. Prodjosudjadi W, Suhardjono, Suwitra K, Pranawa, Widiana IGR, Loekman JS, et al. Detection and prevention of chronic kidney disease in Indonesia: Initial community screening. *Nephrology*. 2009;14(7):669-74. doi: 10.1111/j.1440-1797.2009.01137.x. PubMed Central PMCID: PMC19796026.
73. Qiu Y, Zhao Q, Gu Y, Wang N, Yu Y, Wang R, et al. Association of Metabolic Syndrome and Its Components with Decreased Estimated Glomerular Filtration Rate in Adults. *Annals of Nutrition and Metabolism*. 2019;75(3):168-78. doi: 10.1159/000504356.
74. Rahim MA, Mitra P, Haque HF, Samdani TS, Zaman S, Uddin KNJIJoMS. Prevalence of chronic kidney disease stages 3-5 among patients with type 2 diabetes mellitus in Bangladesh. 2017;11(1):19-24.
75. Rai PK, Rai P, Bedi S. Prevalence and risk factors of chronic kidney disease in overweight and obese population in a tertiary care hospital in North India. *Saudi J Kidney Dis Transpl*. 2019;30(6):1431-8. Epub 2020/01/14. doi: 10.4103/1319-2442.275488. PubMed PMID: 31929291.
76. Rai PK, Rai P, Bhat RG, Bedi S. Chronic Kidney Disease among Middle-Aged and Elderly Population: A cross-sectional screening in a Hospital Camp in Varanasi, India. *Saudi J Kidney Dis Transpl*. 2019;30(4):795-802. Epub 2019/08/30. doi: 10.4103/1319-2442.265454. PubMed PMID: 31464235.
77. Rajput R, Kumar KP, Seshadri K, Agarwal P, Talwalkar P, Kotak B, et al. Prevalence of chronic kidney disease (CKD) in type 2 diabetes mellitus patients: START-India study. 2017;8(2):2-5.

78. Ruwanpathirana T, Senanayake S, Gunawardana N, Munasinghe A, Ginige S, Gamage D, et al. Prevalence and risk factors for impaired kidney function in the district of Anuradhapura, Sri Lanka: a cross-sectional population-representative survey in those at risk of chronic kidney disease of unknown aetiology. *BMC Public Health*. 2019;19(1):763. Epub 2019/06/16. doi: 10.1186/s12889-019-7117-2. PubMed PMID: 31200694; PubMed Central PMCID: PMC6570843.
79. Saber A, Naghibzadeh Tahami A, Najafipour H, Azmandian J. Assessment of prevalence of chronic kidney disease and its predisposing factors in Kerman city. *Nephro-Urology Monthly*. 2017;9(2).
80. Sahin I, Yildirim B, Cetin I, Etikan I, Ozturk B, Ozyurt H, et al. Prevalence of chronic kidney disease in the Black Sea Region, Turkey, and investigation of the related factors with chronic kidney disease. *Renal failure*. 2009;31(10):920-7.
81. Satirapoj B, Supasynhd O, Mayteedol N, Punpanich D, Chairprasert A, Nata N, et al. Obesity and its relation to chronic kidney disease: A population-based, cross-sectional study of a Thai army population and relatives. *Nephrology*. 2013;18(3):229-34.
82. Sepanlou SG, Barahimi H, Najafi I, Kamangar F, Poustchi H, Shakeri R, et al. Prevalence and determinants of chronic kidney disease in northeast of Iran: Results of the Golestan cohort study. *PLoS ONE*. 2017;12(5):e0176540.
83. Shan Y, Zhang Q, Liu Z, Hu X, Liu D. Prevalence and risk factors associated with chronic kidney disease in adults over 40 years: A population study from Central China. *Nephrology*. 2010;15(3):354-61. doi: 10.1111/j.1440-1797.2009.01249.x. PubMed Central PMCID: PMC20470307.
84. Sharma SK, Zou H, Togtokh A, Ene-Iordache B, Carminati S, Remuzzi A, et al. Burden of CKD, proteinuria, and cardiovascular risk among Chinese, Mongolian, and Nepalese participants in the International Society of Nephrology screening programs. 2010;56(5):915-27.
85. Sharma SK, Dhakal S, Thapa L, Ghimire A, Tamrakar R, Chaudhary S, et al. Community-based screening for chronic kidney disease, hypertension and diabetes in Dharan. 2013.
86. Shen Q, Jin W, Ji S, Chen X, Zhao X, Behera TR. The association between socioeconomic status and prevalence of chronic kidney disease: A cross-sectional study among rural residents in eastern China. *Medicine*. 2019;98(11):e14822. Epub 2019/03/19. doi: 10.1097/md.00000000000014822. PubMed PMID: 30882664; PubMed Central PMCID: PMC6426623.
87. Shi Z, Zhang M, Liu J. Chili Intake Is Inversely Associated with Chronic Kidney Disease among Adults: A Population-Based Study. *Nutrients*. 2019;11(12). Epub 2019/12/11. doi: 10.3390/nu1122949. PubMed PMID: 31817083; PubMed Central PMCID: PMC6949978.
88. Shi W, Wang H, Zhou Y, Sun Y, Chen Y. Synergistic interaction of hyperuricemia and hypertension on reduced eGFR: insights from a general Chinese population. *Postgraduate medicine*. 2020;132(3):263-9. doi: 10.1080/00325481.2020.1718387.
89. Singh NP, Ingle GK, Saini VK, Jami A, Beniwal P, Lal M, et al. Prevalence of low glomerular filtration rate, proteinuria and associated risk factors in North India using Cockcroft-Gault and Modification of Diet in Renal Disease equation: An observational, cross-sectional study. *BMC Nephrol*. 2009;10(1). doi: 10.1186/1471-2369-10-4. PubMed Central PMCID: PMC19220921.
90. Singh AK, Farag YMK, Mittal BV, Subramanian KK, Reddy SRK, Acharya VN, et al. Epidemiology and risk factors of chronic kidney disease in India - Results from the SEEK (Screening and Early Evaluation of Kidney Disease) study. *BMC Nephrol*. 2013;14(1). doi: 10.1186/1471-2369-14-114

- 10.1016/j.dsx.2012.05.016. Epub 2012 10.1016/j.dsx.2012.05.016 23153977; Devi, P., Rao, M., Sigamani, A., Prevalence, risk factors and awareness of hypertension in India: A systematic review (2012) *J Hum Hypertens*, doi:10.1038/jhh.2012.33; Du, X., Hu, B., Jiang, L., Wan, X., Fan, L., Wang, F., Implication of CKD-EPI equation to estimate glomerular filtration rate in Chinese patients with chronic kidney disease (2011) *Ren Fail*, 33 (9), pp. 859-865. , 10.3109/0886022X.2011.605533 21851197; Gifford, F.J., Methven, S., Boag, D.E., Spalding, E.M., Macgregor, M.S., Chronic kidney disease prevalence and secular trends in a UK population: The impact of MDRD and CKD-EPI formulae (2011) *QJM*, 104 (12), pp. 1045-1053. , 10.1093/qjmed/hcr122 21821654; Stevens, L.A., Li, S., Kurella Tamura, M., Chen, S.C., Vassalotti, J.A., Norris, K.C., Comparison of the CKD epidemiology collaboration (CKD-EPI) and modification of diet in renal disease (MDRD) study equations: Risk factors for and complications of CKD and mortality in the kidney early evaluation program (KEEP) (2011) *Am J Kidney Dis*, 57 (SUPPL 2), pp. 199-216. , 21338849; McFarlane, S.I., McCullough, P.A., Sowers, J.R., Soe, K., Chen, S.C., Li, S., Comparison of the CKD epidemiology collaboration (CKD-EPI) and modification of diet in renal disease (MDRD) study equations: Prevalence of and risk factors for diabetes mellitus in CKD in the kidney early evaluation program (KEEP) (2011) *Am J Kidney Dis*, 57 (SUPPL 2), pp. 1924-1931. , 21338847.
91. Song J, Wang C, Ma A, Zheng H, Zheng W, Hou X, et al. Self-reported snoring is associated with chronic kidney disease independent of metabolic syndrome in middle-aged and elderly Chinese. *Journal of Diabetes Investigation*. 2019;10(1):124-30. doi: 10.1111/jdi.12855.
  92. Sun X, He J, Ji X-L, Zhao Y-M, Lou H-Y, Song X-X, et al. Association of chronic kidney disease with coronary heart disease and stroke risks in patients with type 2 diabetes mellitus: an observational cross-sectional study in Hangzhou, China. *Chin Med J*. 2017;130(1):57-63.
  93. Tatapudi RR, Rentala S, Gullipalli P, Komarraju AL, Singh AK, Tatapudi VS, et al. High prevalence of CKD of unknown etiology in Uddanam, India. 2019;4(3):380-9.
  94. Trivedi H, Vanikar A, Patel H, Kanodia K, Kute V, Nigam L, et al. High prevalence of chronic kidney disease in a semi-urban population of Western India. *Clinical kidney journal*. 2016;9(3):438-43.
  95. Varma PP, Raman DK, Ramakrishnan T, Singh P, Varma A. Prevalence of early stages of chronic kidney disease in apparently healthy central government employees in India. *Nephrology Dialysis Transplantation*. 2010;25(9):3011-7.
  96. Varma P, Raman D, Ramakrishnan T, Singh P. Prevalence of early stages of chronic kidney disease in healthy Army personnel. *Medical Journal Armed Forces India*. 2011;67(1):9-14.
  97. Wang S, Chen R, Liu Q, Shu Z, Zhan S, Li L. Prevalence, awareness and treatment of chronic kidney disease among middle-aged and elderly: The China Health and Retirement Longitudinal Study. *Nephrology*. 2015;20(7):474-84. doi: 10.1111/nep.12449. PubMed Central PMCID: PMC25773384.
  98. Wang Q, Xie D, Xu X, Qin X, Tang G, Wang B, et al. Blood pressure and renal function decline: A 7-year prospective cohort study in middle-aged rural Chinese men and women. *J Hypertens*. 2015;33(1):136-43. doi: 10.1097/HJH.0000000000000360. PubMed Central PMCID: PMC25255396.
  99. Wang F, He K, Wang J, Zhao M-H, Li Y, Zhang L, et al. Prevalence and Risk Factors for CKD: A Comparison Between the Adult Populations in China and the United States. *Kidney International Reports*. 2018;3(5):1135-43. doi: <https://doi.org/10.1016/j.ekir.2018.05.011>.

100. Wen J, Chen Y, Huang Y, Lu Y, Liu X, Zhou H, et al. Association of the TG/HDL-C and non-HDL-C/HDL-C ratios with chronic kidney disease in an adult Chinese population. *Kidney and Blood Pressure Research*. 2017;42(6):1141-54.
101. Xu SS, Hua J, Huang YQ, Shu L. Association between dietary patterns and chronic kidney disease in a middle-aged Chinese population. *Public Health Nutrition*. 2020;23(6):1058-66. doi: 10.1017/S1368980019002805.
102. Yang S, Xiao F, Pan L, Zhang H, Ma Z, Liu S, et al. Association of serum irisin and body composition with chronic kidney disease in obese Chinese adults: A cross-sectional study. *BMC Nephrol*. 2015;16(1). doi: 10.1186/s12882-015-0009-5. PubMed Central PMCID: PMC25884312.
103. Yang S, Li M, Chen Y, Zhao X, Chen X, Wang H, et al. Comparison of the Correlates Between Body Mass Index, Waist Circumference, Waist-to-Height Ratio, and Chronic Kidney Disease in a Rural Chinese Adult Population. *J Ren Nutr*. 2019;29(4):302-9.e1. Epub 2018/12/26. doi: 10.1053/j.jrn.2018.10.008. PubMed PMID: 30581064.
104. Yang Y, Zhou W, Wang Y, Zhou R. Gender-specific association between uric acid level and chronic kidney disease in the elderly health checkup population in China. *Ren Fail*. 2019;41(1):197-203. Epub 2019/04/12. doi: 10.1080/0886022x.2019.1591994. PubMed PMID: 30973288; PubMed Central PMCID: PMC6461085.
105. Yang Y, Wang N, Jiang Y, Zhao Q, Chen Y, Ying X, et al. The prevalence of diabetes mellitus with chronic kidney disease in adults and associated factors in Songjiang District, Shanghai. *Annals of palliative medicine*. 2021;10(7):7214-24. Epub 2021/07/16. doi: 10.21037/apm-21-803. PubMed PMID: 34263637.
106. Yuzbashian E, Asghari G, Mirmiran P, Zadeh-Vakili A, Azizi F. Sugar-sweetened beverage consumption and risk of incident chronic kidney disease: Tehran lipid and glucose study. *Nephrology*. 2016;21(7):608-16. doi: 10.1111/nep.12646. PubMed Central PMCID: PMC26439668.
107. Zaman SB, Karim MA, Hossain N, Al Kibria GM, Islam SMS. Plasma triglycerides as a risk factor for chronic kidney disease in type 2 diabetes mellitus: Evidence from northeastern Thailand. *Diabetes Research and Clinical Practice*. 2018;138:238-45. doi: <https://doi.org/10.1016/j.diabres.2018.02.011>.
108. Zhang C, Zhong Y, Tian H. Increased cardio-ankle vascular index is independently associated with chronic kidney disease: A cross-sectional study in Chinese patients with type 2 diabetes mellitus. *J Diabetes Complications*. 2019;33(9):623-7. Epub 2019/07/01. doi: 10.1016/j.jdiacomp.2019.05.009. PubMed PMID: 31255433.
109. Zhang M, Wang K, Zheng H, Zhao X, Xie S, Liu C. Monocyte lymphocyte ratio predicts the new-onset of chronic kidney disease: A cohort study. *Clin Chim Acta*. 2020;503:181-9. doi: 10.1016/j.cca.2019.11.021.
110. Zhang Z, Cui T, Cui M, Kong X. High prevalence of chronic kidney disease among patients with diabetic foot: A cross-sectional study at a tertiary hospital in China. *Nephrology (Carlton)*. 2020;25(2):150-5. Epub 2019/04/27. doi: 10.1111/nep.13596. PubMed PMID: 31025471.
