# Supplementary material for: Prevalence of chronic kidney disease stages 3–5 in low- and middle-income countries in Asia: A systematic review and meta-analysis
Source: PubMed Central journal article supplement (PMC8880400; doi:10.1371/journal.pone.0264393), 2022-02-25
Supplement: pone.0264393.s007.pdf [file pone.0264393.s007.pdf]

**S7 Appendix. Funnel plots, Egger's test and trim-and-fill method in the pooled prevalence and associated risk factors of CKD stage 3-5 in LMICs in Asia.**

Abbreviations:

CKD, chronic kidney disease; LMICs, low- and middle- income counties; LDLc, low-density lipoprotein cholesterol; HDLc, high-density lipoprotein cholesterol; HT, hypertension; HIV, human immunodeficiency viruses

**Fig S30. Publication bias of included studies on the pooled prevalence of CKD stage 3-5 in LMICs in Asia.**

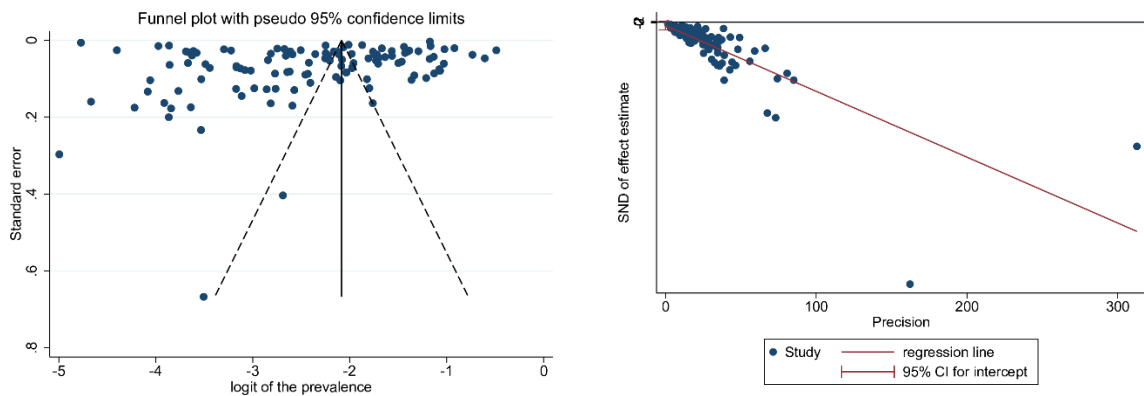

(Egger's test  $P = 0.137$ )

**Fig S31. Publication bias of included studies on the association between elderly and CKD stage 3-5.**

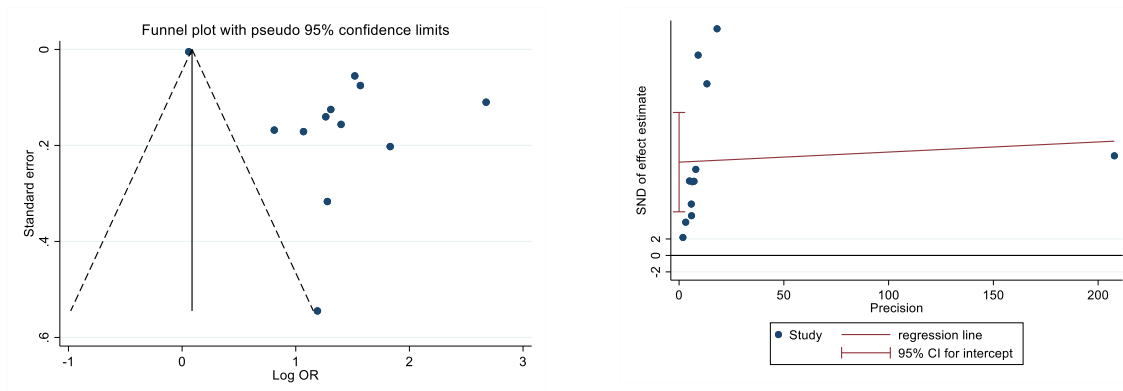

(Egger's test  $P = 0.002$ ; trim-and-fill analysis = no trimming performed, data unchanged)

**Fig S32. Publication bias of included studies on the association between gender (male) and CKD stage 3-5.**

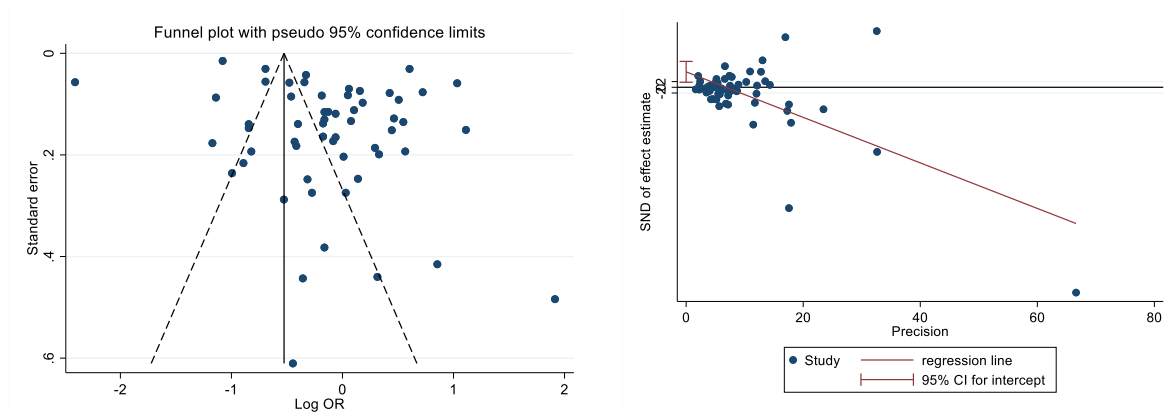

(Egger's test  $P = 0.004$ ; trim-and-fill analysis = no trimming performed, data unchanged)

**Fig S33. Publication bias of included studies on the association between education and CKD stage 3-5.**

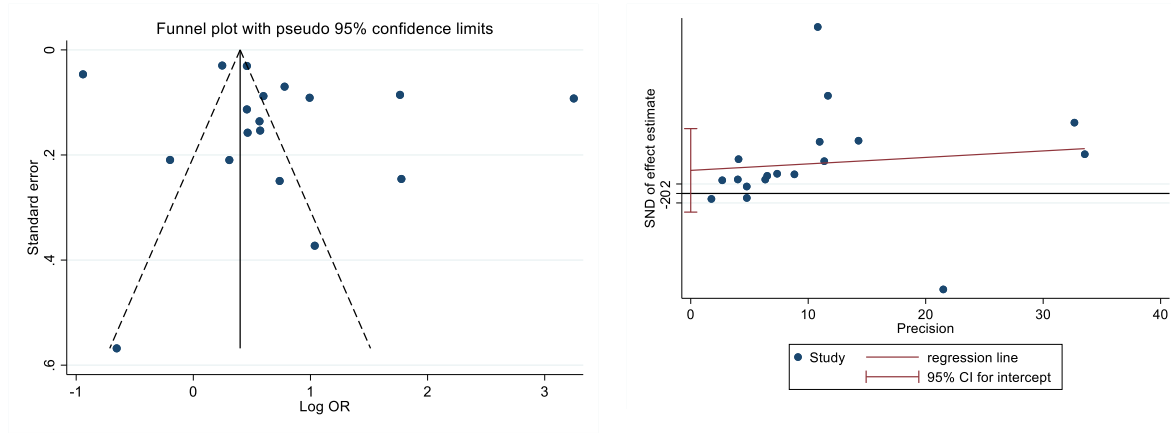

(Egger's test  $P = 0.258$ )

**Fig S34. Publication bias of included studies on the association between marital status and CKD stage 3-5.**

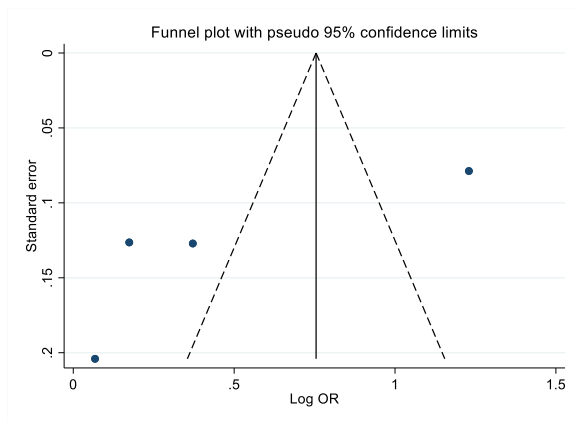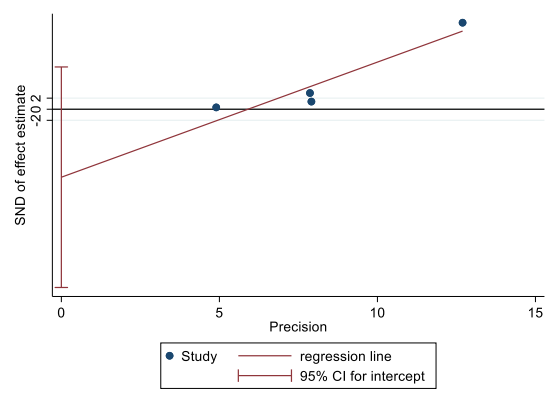

(Egger's test  $P = 0.118$ )

**Fig S35. Publication bias of included studies on the association between obese and CKD stage 3-5.**

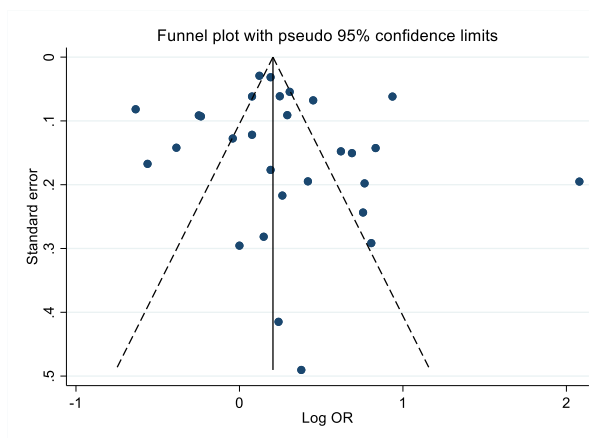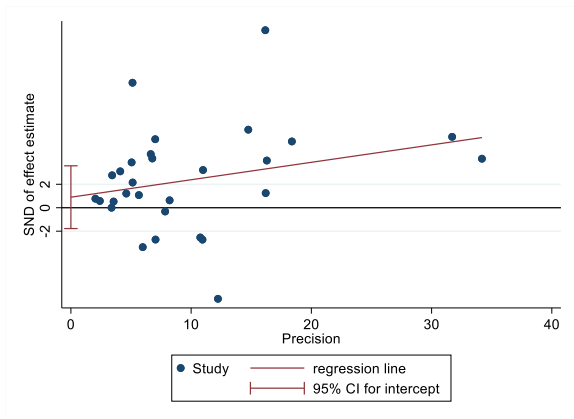

(Egger's test  $P = 0.496$ )

**Fig S36. Publication bias of included studies on the association between lower weight and CKD stage 3-5.**

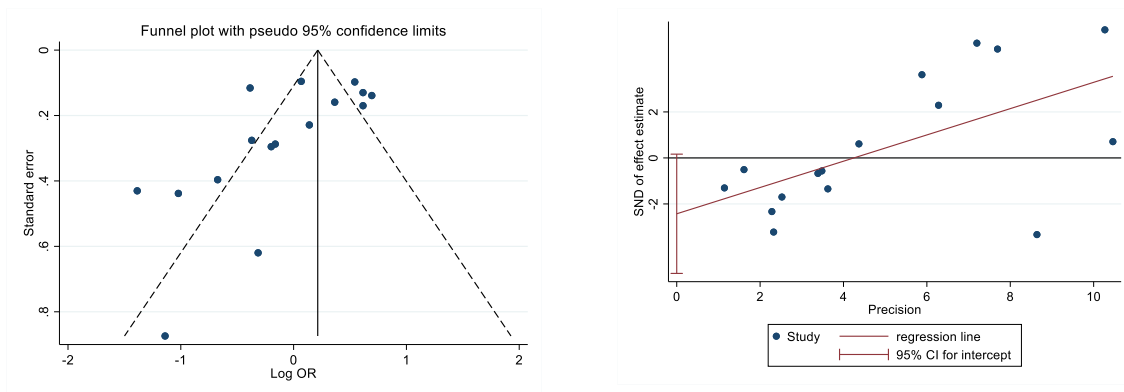

(Egger's test  $P = 0.064$ )

**Fig S37. Publication bias of included studies on the association between hypertension and CKD stage 3-5.**

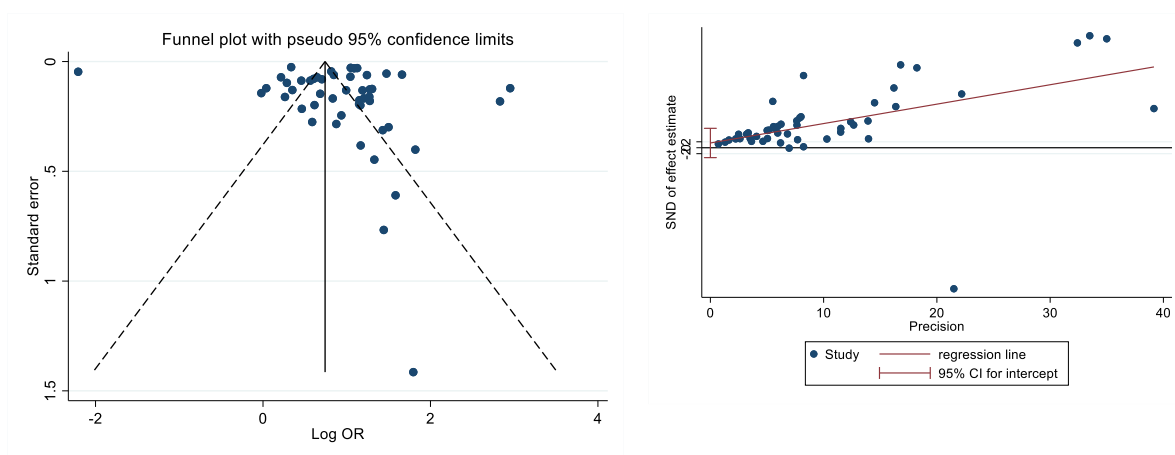

(Egger's test  $P = 0.518$ )

**Fig S38. Publication bias of included studies on the association between diabetes and CKD stage 3-5.**

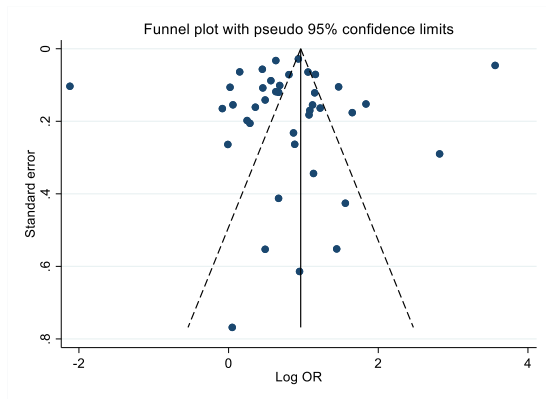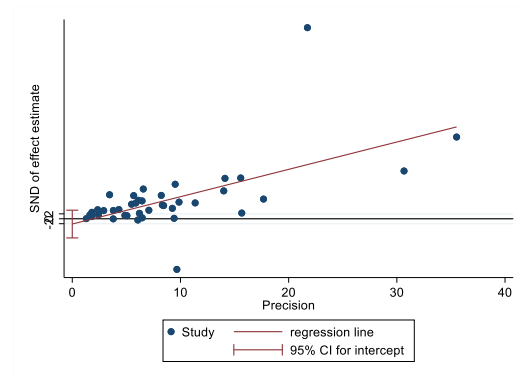

(Egger's test  $P = 0.446$ )

**Fig S39. Publication bias of included studies on the association between dyslipidemia and CKD stage 3-5.**

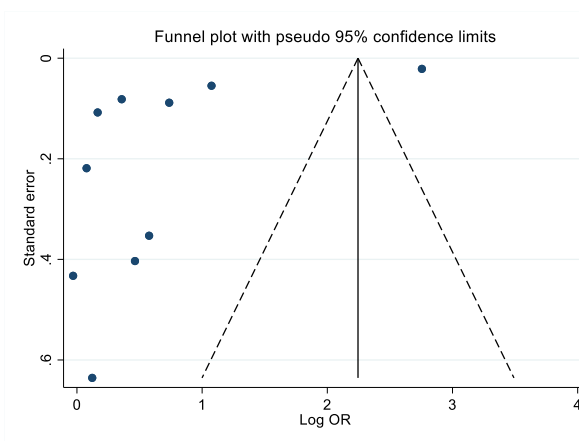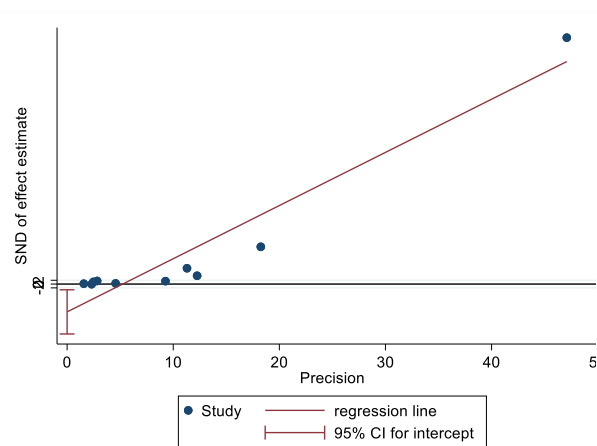

(Egger's test  $P = 0.020$ ; trim-and-fill analysis = no trimming performed, data unchanged)

**Fig S40. Publication bias of included studies on the association between hypertriglyceridemia and CKD stage 3-5.**

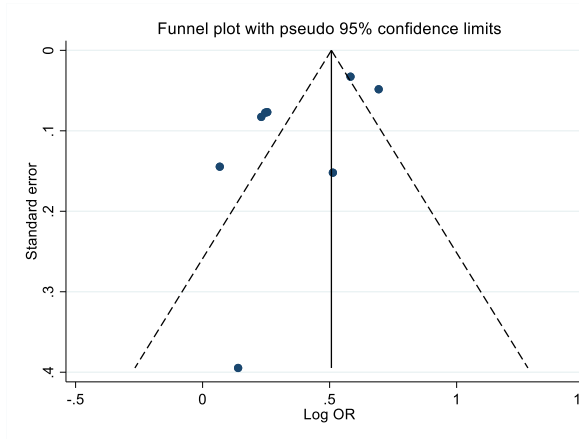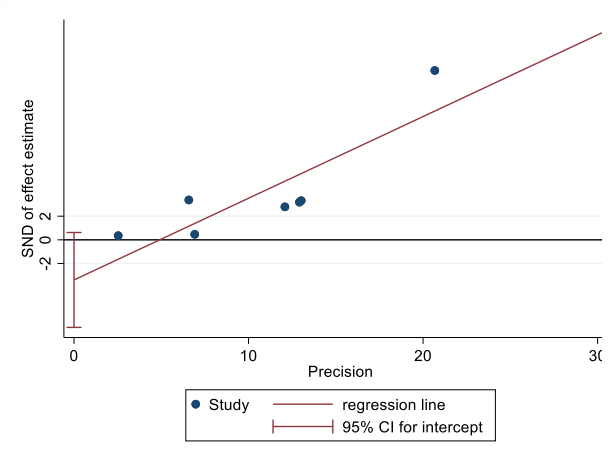

(Egger's test  $P = 0.084$ )

**Fig S41. Publication bias of included studies on the association between Hypercholesterolemia and CKD stage 3-5.**

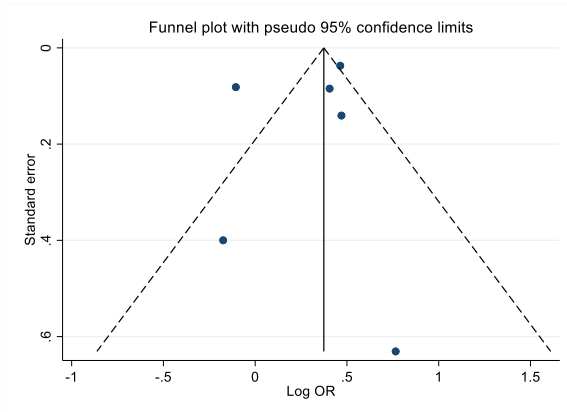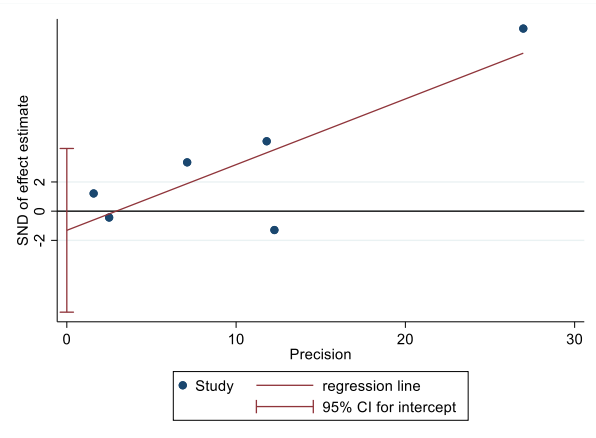

(Egger's test  $P = 0.551$ )

**Fig S42. Publication bias of included studies on the association between high LDL cholesterol and CKD stage 3-5.**

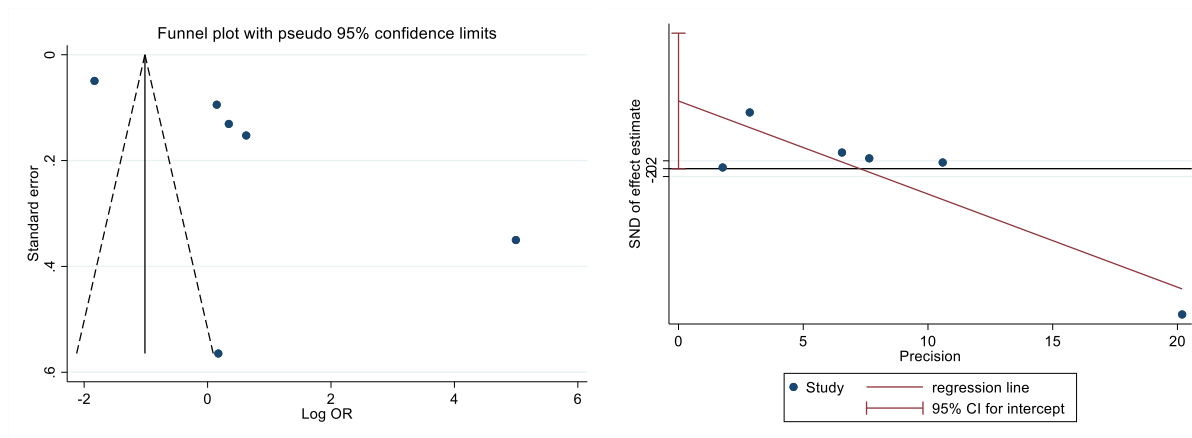

(Egger's test  $P = 0.050$ ; trim-and-fill analysis = no trimming performed, data unchanged)

**Fig S43. Publication bias of included studies on the association between low HDL cholesterol and CKD stage 3-5.**

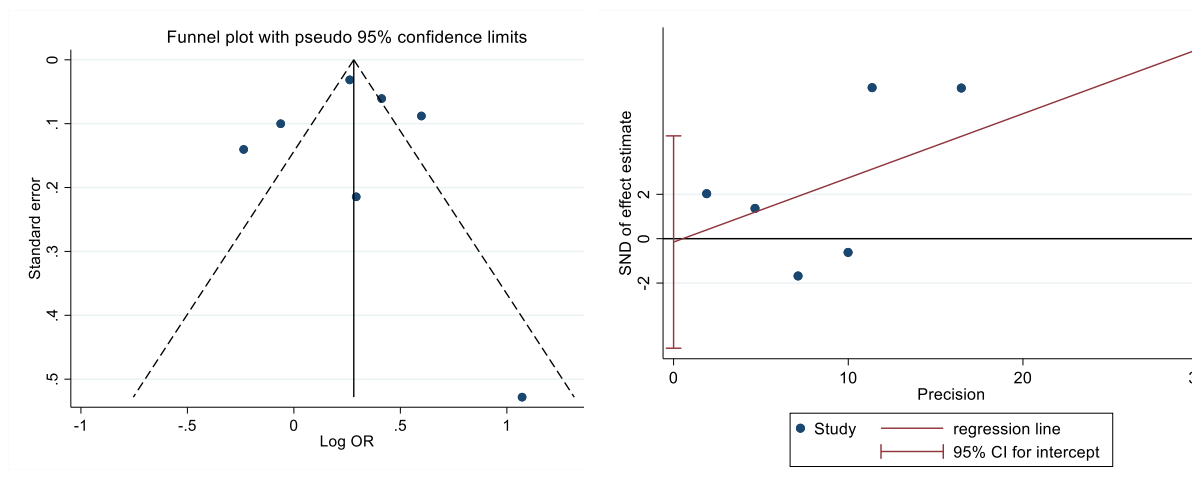

(Egger's test  $P = 0.938$ )

**Fig S44. Publication bias of included studies on the association between hyperuricemia and CKD stage 3-5.**

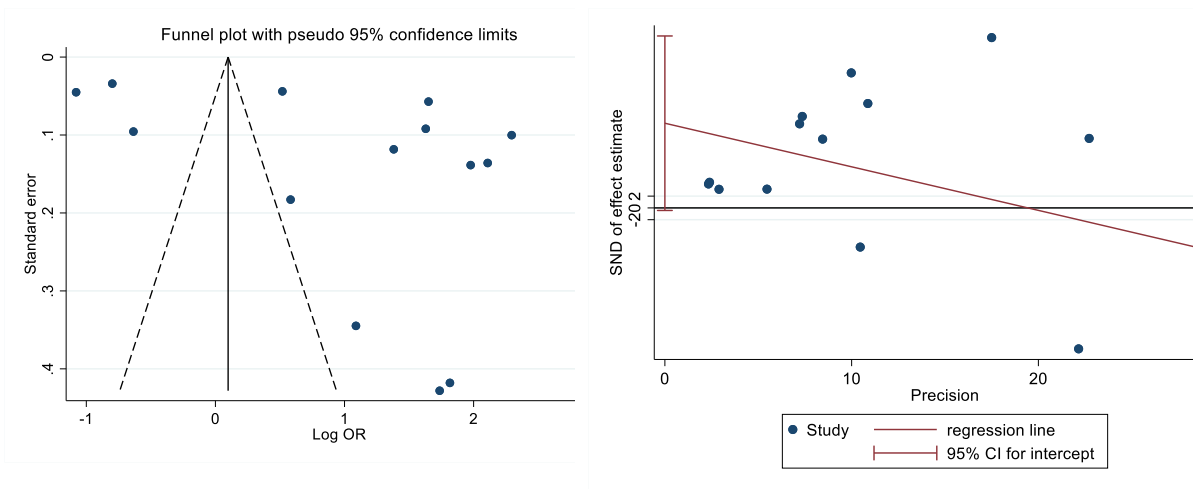

(Egger's test  $P = 0.056$ )

**Fig S45. Publication bias of included studies on the association between anemia and CKD stage 3-5.**

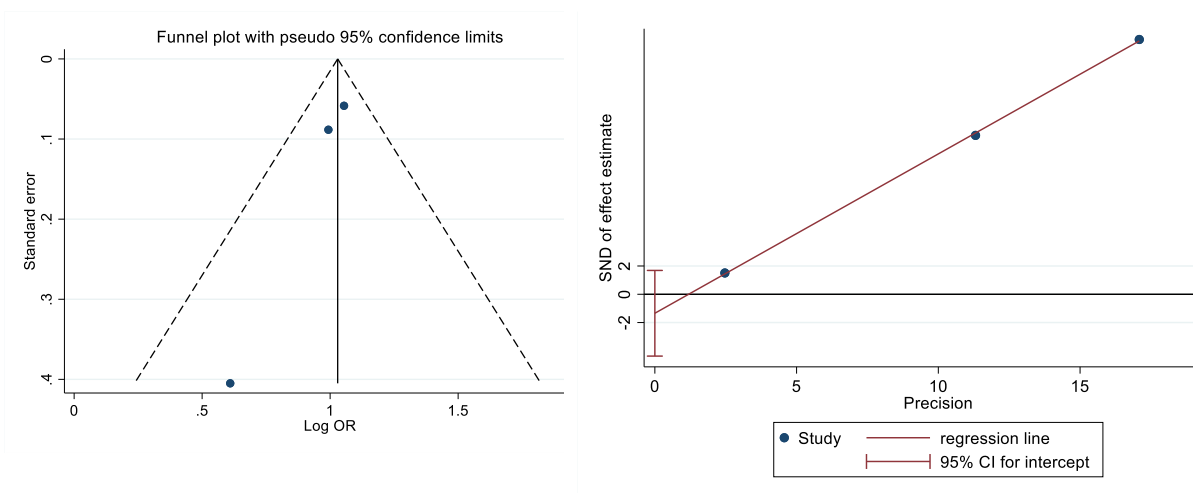

(Egger's test  $P = 0.112$ )



**Fig S46. Publication bias of included studies on the association between smoking status and CKD stage 3-5.**

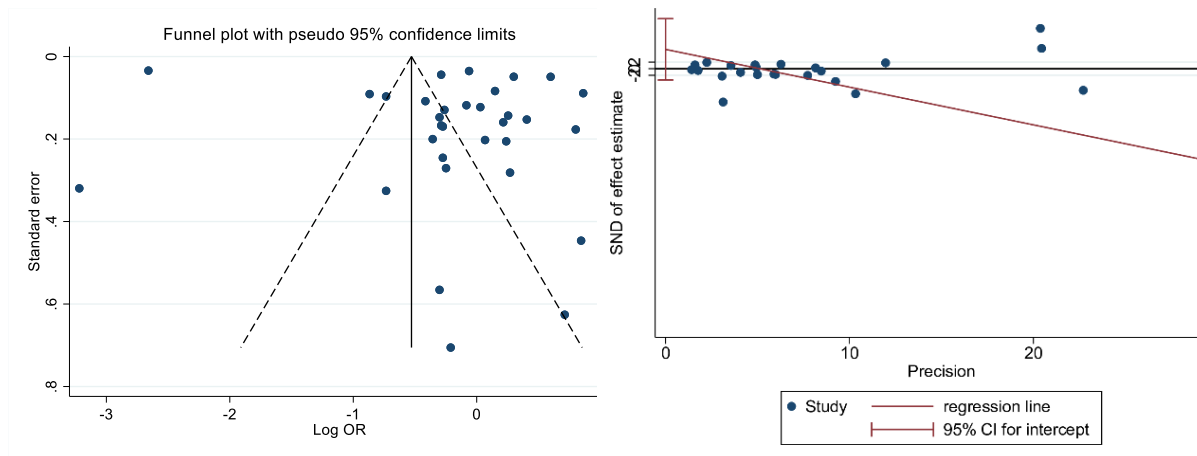

(Egger's test  $P = 0.199$ )

**Fig S47. Publication bias of included studies on the association between alcohol consumption and CKD stage 3-5.**

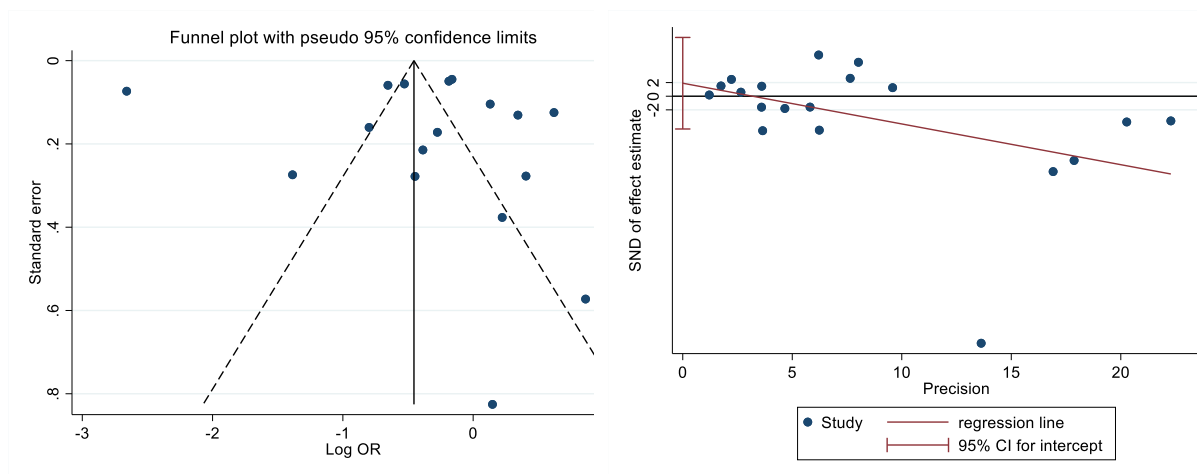

(Egger's test  $P = 0.557$ )

**Fig S48. Publication bias of included studies on the association between history of coronary heart disease and CKD stage 3-5.**

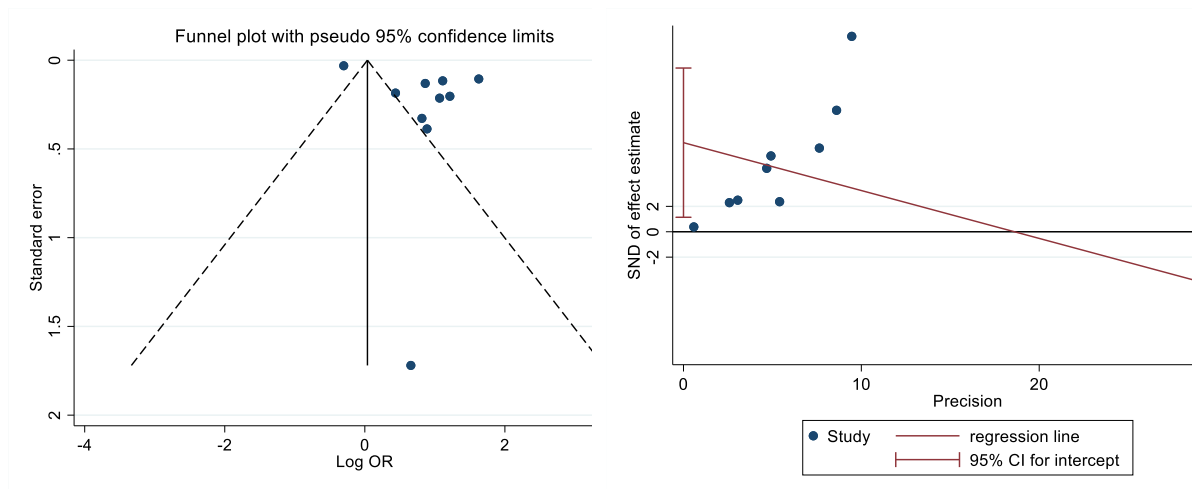

(Egger's test  $P = 0.025$ ; trim-and-fill analysis, the recalculated OR with twelve adjusted studies was 1.99, 95% CI 1.18-3.35,  $P = 0.010$ )

**Fig S49. Publication bias of included studies on the association between history of stroke and CKD stage 3-5.**

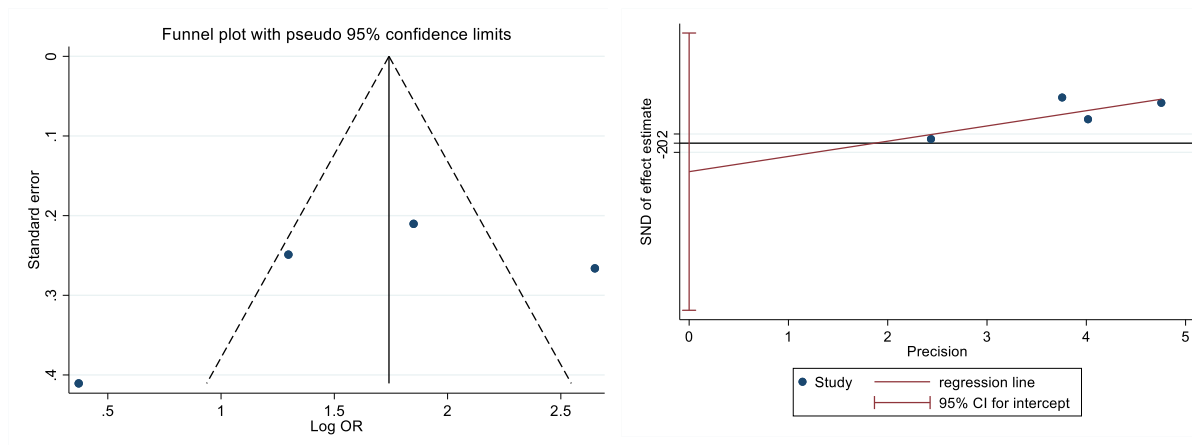

(Egger's test  $P = 0.470$ )

**Fig S50. Publication bias of included studies on the association between history of cardiovascular disease and CKD stage 3-5.**

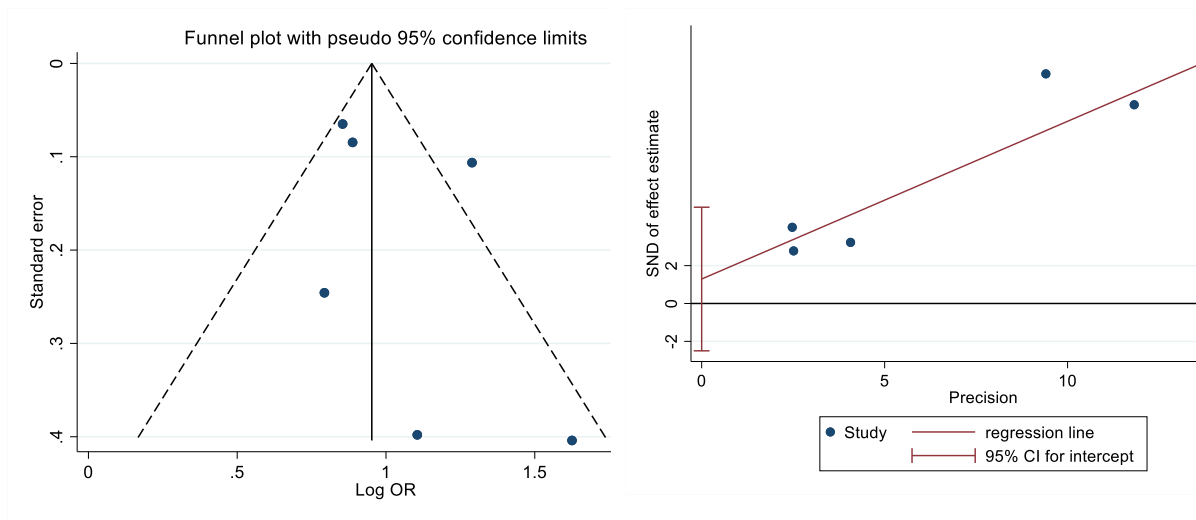

(Egger's test  $P = 0.398$ )

**Fig S51. Publication bias of included studies on the association between family history of hypertension and CKD stage 3-5.**

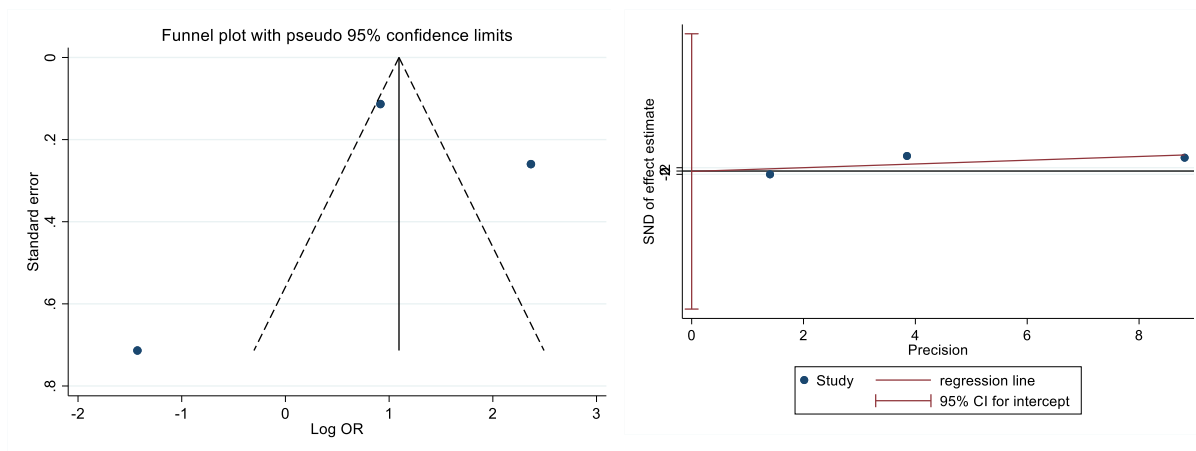

(Egger's test  $P = 0.977$ )

**Fig S52. Publication bias of included studies on the association between family history of chronic kidney disease and CKD stage 3-5.**

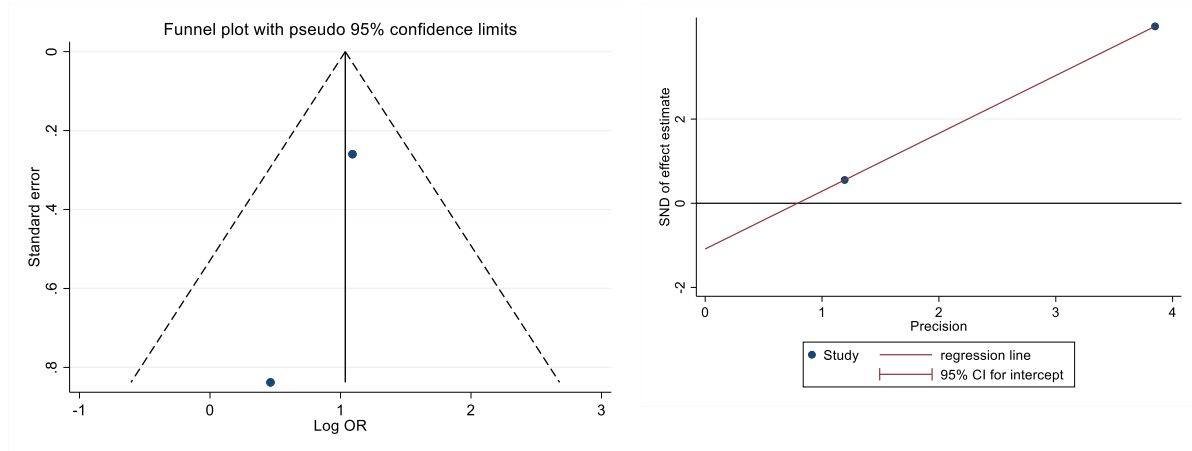

(Egger's test  $P =$  can't compute)

**Fig S53. Publication bias of included studies on the association between physical activity and CKD stage 3-5.**

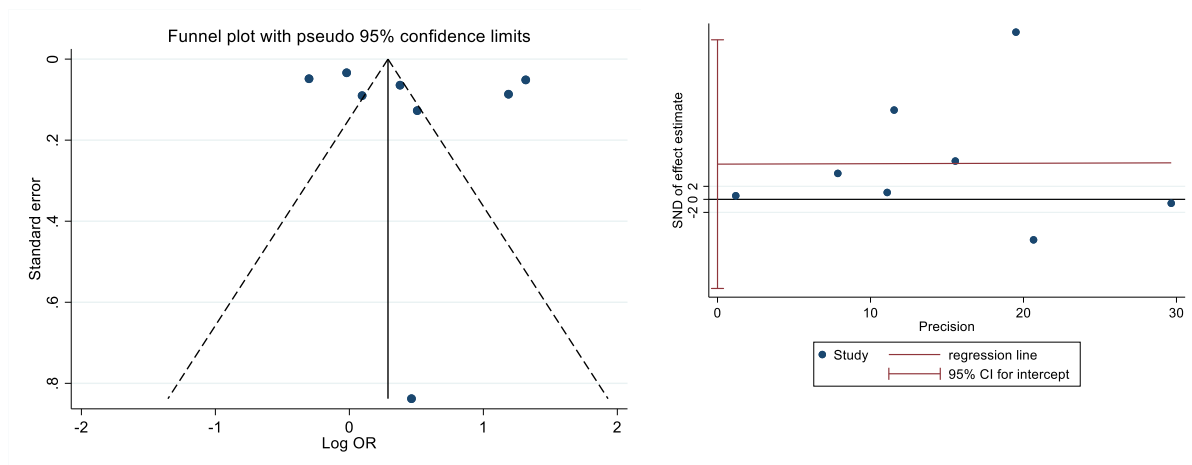

(Egger's test  $P = 0.514$ )

**Fig S54. Publication bias of included studies on the association between nonsteroidal anti-inflammatory drugs: NSAIDs use and CKD stage 3-5.**

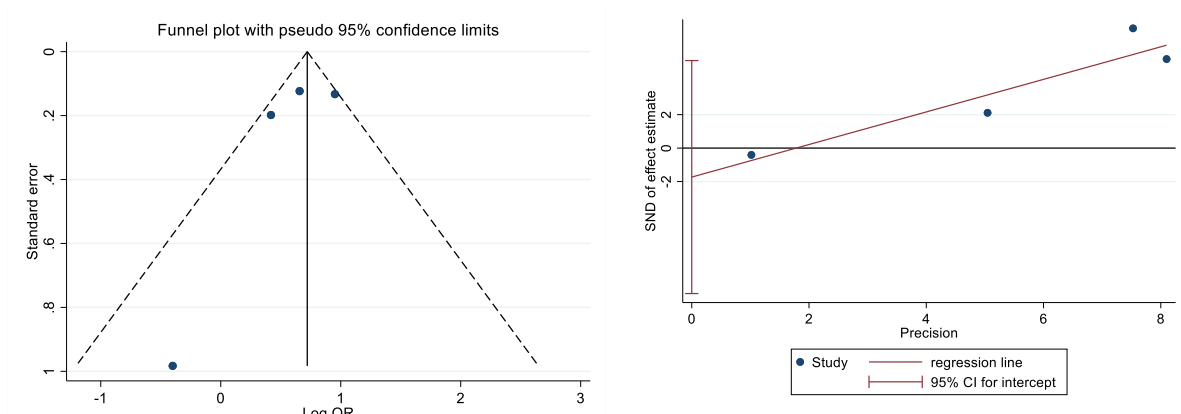

(Egger's test  $P = 0.397$ )

**Fig S55. Publication bias of included studies on the association between CD4 cell count in HIV patients and CKD stage 3-5.**

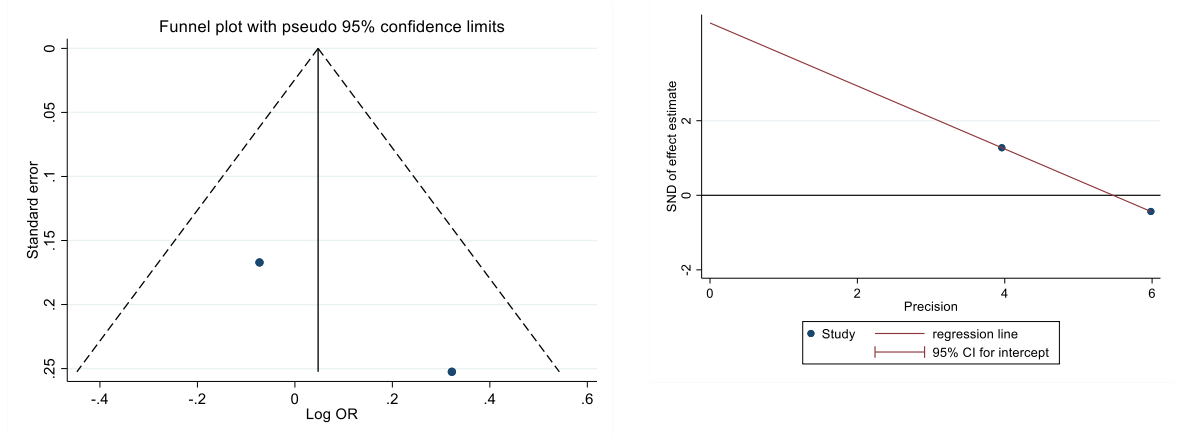

(Egger's test  $P = \text{can't compute}$ )
